# Supplementary material for: Global and national CO 2 uptake by cement carbonation from 1928 to 2024
Source: Copernicus journal article supplement (doi:10.5194/essd-17-2231-2025), 2025-05-27
Supplement: Supplementary file 1 [file essd-17-2231-2025-supplement.zip]

## Sheet: Summary
Table S1: Activity-level data of cement clinker production and consumption
Index	Name	Activity data	Time Span	Area	Source
SI data 1	Cement production by 163 countries and regions, 1928-2024	Cement production	1928-2024	163 countries and regions	1) Cement production from 1930 to 2022 is from USGS. Cement Statistics and Information. http://minerals.usgs.gov/minerals/pubs/commodity/cement/index.html (2024). 2) Cement production in 2023 are from USGS. Cement Statistics and Information. http://minerals.usgs.gov/minerals/pubs/commodity/cement/index.html (2024). And OneStone Consulting. Cement Market Report for 130 countries, 2 Updates per yea…
SI data 2	Clinker-to-cement ratios for 163 countries and regions, 1928-2023	Clinker-to-cement ratios	1928-2023	163 countries and regions	For china: 1) China Cement Association, China Cement Yearbook 2015. https://data.cnki.net/yearBook/single?id=N2016060072. 2) Ministry of Industry and Information Technology https://baijiahao.baidu.com/s?id=1626895719431133816&wfr=spider&for=pc. 3) China Cement Association: China Cement Almanac, China building industry press, Beijing., 2001-2015. 4) Gao, T., Shen, L., Shen, M., Liu, L., Chen, F. a…
SI data 3	Clinker imports for 42 countries and regions, 1990-2023	Clinker imports	1990-2023	42 countries and regions	Clinker trade: UN Comtrade Database. https://comtradeplus.un.org/. (last accessed: 2 June 2024).
SI data 4	Clinker exports for 42 countries and regions, 1990-2023	Clinker exports	1990-2023	42 countries and regions	Clinker trade: UN Comtrade Database. https://comtradeplus.un.org/. (last accessed: 2 June 2024).
SI data 5	Revised clinker production for 163 countries and regions, 1928-2024	Clinker production	1928-2024	42 countries and regions	1) UNFCCC. National Inventory Submission 2023. Available at: https://unfccc.int/ghg-inventories-annex-i-parties/2023. (last accessed: 9 July 2024) 2) Andrew, R. M. Global CO2 emissions from cement production. Earth Syst. Sci. Data 10, 195–217 (2018). https://doi.org/10.5194/essd-10-195-2018.

## Sheet: SI data1
SI data 1. Cement production by 163 countries and regions, 1928-2024
unit: kiloton (kt)
code	ISO	countries and regions	1928	1929	1930	1931	1932	1933	1934	1935	1936	1937	1938	1939	1940	1941	1942	1943	1944	1945	1946	1947	1948	1949	1950	1951	1952	1953	1954	1955	1956	1957	1958	1959	1960	1961	1962	1963	1964	1965	1966	1967	1968	1969	1970	1971	1972	1973	1974
1	AUS	Australia	766	720	708	396	251	326	417	559	656	730	862.539	881.778	879	390.171	337.947	351.887	313.976	704.4	734.4	896.4	1029.6	1047.6	1177.2	1236	1357	1598.09	1913.95	1991.04	2134.99	2322.09	2459.04	2615.1	2791.96	2856.94	2933.01	3119.08	3625.97	3801.98	3674.07	3816.99	3928.02	4310.06	4508.7	4683.75	4934.99	5246.09	6111.37
2	AUT	Austria	523	582	602	500	351	280	315	371	369	426	650	700	750	842	682	773	450	400	387.68	281.271	721.379	1091.01	1280.4	1474.95	1402	1393.93	1621.96	1859.03	1935.95	2129.02	2154.09	2417.09	2830	3083.95	3057	3311.98	3769.06	4044	4501.08	4547.98	4553.1	4558.04	4805.29	5490.07	6343.56	6258.3	6433.35
3	BEL	Belgium	3046	3248	3050	3050	2100	1950	1900	2200	2350	3008.02	3054.14	2551.76	2551.76	630.58	510.67	459.52	600	646.898	1889.78	2609.17	3330.95	2925	3557.23	4395	4111.02	4626.1	4375.04	4689.03	4663.96	4705.06	4056.96	4439	4388	4751.96	4797.33	4708.98	5846.07	5905.08	5796.09	5819.97	5740.15	6269.04	6727.22	6929.48	7091.83	7039.23	7466.42
4	BGR	Bulgaria	108	151	174	104	139	121	130	124	122	135	180	180	180	126.044	126.044	126.044	126.044	245.1	250	300	325	450	550	634.971	674.028	700.975	779.942	812.006	859.078	880.057	933.952	1432.99	1584.95	1749.03	1892.97	2205.09	2632.32	2681.1	2856.09	3358.03	3516.13	3552.12	3667	3875.61	3910.98	4176.73	4297.37
5	CAN	Canada	1759	1945	1872	1619	737	383	553	554	784	975.231	876.193	909.875	1200.14	1328.59	1448.82	1159.29	1141.6	1344.93	1835.3	1894.96	2242.77	2526.86	2646.81	2700.03	2940	3529.95	3562.01	3996.07	4556	5488.07	5582.05	5701.1	5249.98	5629.97	6124.07	6364.04	7176.04	7578.04	8157.07	7160.01	7408.17	7484.06	7206.11	8222.86	9079.07	10091.3	10372.5
6	HRV	Croatia										0	0	0	0	0	0	0	0	0	0	0	0	0	0	0	0						0	0	0	0	0	0	0	0	0	0	0	0	0	0	0	0	0
7	CYP	Cyprus										0	0	0	0	0	0	0	0	0	0	0	0	0	0	0	0	0	0	0	0	0	83.0596	83.0596	88.0057	92.9517	94.9984	96.0217	69.927	98.0683	98.9211	186.927	237.922	243.039	265.751	302.938	422.662	450.779	338.311
8	CZE	Czechia					1081	850	910	980	1050	1360	1360	1360	1360	300	320	350	350	650	920	1404	1650	1738	1875	2080.07	2210.03	2320.04	2562.06	2892.08	3148.08	3672.02	4110	4700.12	5051.12	5343.1	5849.99	5178.01	5493.02	5713.03	6130.04	6208.15	0	0	7400.21	7954.39	8038.74	8378.87	8964.79
9	DNK	Denmark	779	799	779	509	415	554	770	757	792.369	676.125	639.957	696	441	421.137	434.765	639.038	646.837	219.996	501.835	633.56	769.064	834	873	984.947	1211.95	1260.05	1222.02	1259.03	1186.03	1165.05	1068.01	1390.01	1442.03	1583.93	1627.93	1521	1898.09	1995.48	2097.81	2200.14	2278.08	2607.08	2603.09	2732.79	2748.21	2886.98	2491.53
10	FIN	Finland	280	278	203	162	154	163	241	284	332.557	410.371	475.162	563	563	307.087	178.802	238.279	180.221	277.679	329.792	417.737	555.8	655.984	743	829.061	778.066	937.021	1040.04	1056.07	960.046	946.061	925.083	1170	1253.06	1341.06	1356.92	1428.05	1571.99	1770.01	1556.98	1514	1475.97	1759.09	1873.86	1810.37	1983.61	2091.54	2202.2
11	FRA	France	4240	5787	4989	4989	5199	4766	4718	4033	149	234.638	266.366	305.8	278.5	3405.76	2496.62	2926.25	1485.56	1524	3372	3855	5379	6443	7208	8125	8645.02	9311.03	9746.11	10626	11185.1	12476.2	13414	13999	14173.2	15530.1	16700.1	18134.1	21537.2	22365.2	23304.1	24600.1	25393.4	27543.6	29004	28942.4	30282	30706.5	32462.4
12	DEU	Germany	7576	7039	5511	3718	2888	3931	6625	8802	11530	12605	15000	15000	13349	11349	7287	9073	2595.6	2529	2529	2996.2	5581.2	8460	10877	13846.6	14876.4	18111.1	19189.2	22023.1	23257.2	23063.1	23241.2	27369.1	29937.1	32419.2	34028.2	34675.3	39399.4	40220.3	41189.2	38695.7	40994.6	42488.7	46302.3	49475.9	51634.6	50549.8	46060.2
13	GRC	Greece	145	155	180	195	196	200	248	273	276.85	290	308	308	308	63	30	0	0	55	103	182	288	326	432	433.036	596.085	746.001	853.962	1129.06	1238.05	1225.09	1340.04	1444.08	1636.97	1837.03	1854.77	2293.95	2672.06	3212.04	3588.11	3449.96	4079.13	4840.14	4847.01	5538.14	5998.9	6492.31	7030.16
14	HUN	Hungary	426	403	329	296	197	181	225	280	215	392	395	395	395	669.33	728.19	701.29	153.29	38.28	163.59	209.06	145	640	800	948.278	1079.6	1059.99	964.14	1174.94	995.01	989.04	1302.01	1432.99	1570.97	1602.01	1728.05	1797.98	2256.94	2382.97	2600.94	2656.03	2801	2564.1	2770.89	2711.02	2963.17	3403.97	3436.62
15	IRL	Ireland										0	110	261	272	294	202	251.98	222.515	192	300	291	398	453	444	426.043	459.983	7830.12	8761	10587.1	10789.1	11906	521.041	529.057	569.99	773.972	905.981	801.09	973.008	1051.97	1113.03	1298.08	1351.98	1273.01	858.929	1502.9	1496.55	1571.83	1668.88
16	ITA	Italy	3077	3497	3482	3077	3125	3554	4092	4196	3859	4359.11	4607.45	4800	2793.55	2793.55	2243.32	1712.19	1349.95	1143.07	2019	2790.09	3143.81	4036.5	5003.55	5577.96	6652.1	0	0	0	0	0	12823.1	14402.1	16014.1	18031.1	20157.2	22088.2	22840.2	20695.1	22374.1	26272.2	29465.5	31498.5	33069.2	31786.7	33449.3	36304.5	36301.8
17	LUX	Luxembourg										0	0	0	0	0	0	0	0	50	75.1	89.272	102	121	125	132.008	103.697	147.017	150.94	157.08	163.049	163.049	195.966	192.043	209.951	230.93	230.077	202.959	205.005	222.061	211.998	183.004	191.02	207.052	244.89	262.123	309.287	357.358	390.917
18	NLD	Netherlands					254	360	394	360	401	441	456	541	541	461	370	358	214	231	402.654	519.262	588.997	552.032	592.8	701.999	813.029	860.955	854.303	1100.92	1255.96	1320.08	1365.96	1599.96	1797.98	1903.04	2015.09	2081.1	2872.98	2973.09	3163.09	3348.99	3436.14	3296.12	3829.35	4044.31	4022.55	4076.06	4086.94
19	NOR	Norway	318	319	321	220	235	222	249	263	290	320.481	331.6	390	230	312.83	373.648	311.152	321.731	141.8	436.211	472.612	526.187	592.184	583.2	701.999	705.921	755.041	770.05	800.067	916.043	989.04	1031	1130.94	1151.07	1227.99	1412.01	1437.94	1540.95	1603.03	1826.97	2066.09	2297.02	2491.96	2608.53	2721	2647.53	2725.53	2637.56
20	POL	Poland	1098	1008	832	546	354	411	721	843	1048	1289.11	1719.45	1719.45	1300	300.906	300.906	300.906	300.906	300.906	1398.91	1521.82	1823.86	2200	2376	2688.1	2659.95	3294.07	3403.06	3813.07	4034.96	4487.95	5058.11	5317.01	6592.07	7363.99	7544.1	7674.06	8761	9573	10041	11138	11600.2	11830.3	12177.4	13078.9	13983.2	15545.1	16761.4
21	PRT	Portugal	76	88	99	95	121	164	185	214	245	254	268	297	271.173	272	243.6	246.799	244.974	262.98	326.4	427.734	498.069	521.435	572.549	641.964	727.07	769.026	798.361	779.089	1024	951.007	1024	1031	1197.97	1245.04	1402.8	1432.99	1621.96	1679.95	1720.03	1836.01	1861.08	2036.07	2331.9	2457.06	2794.47	3300.57	3294.22
22	ROU	Romania	332	317	396	196	213	220	314	361	376	456.311	448.402	531	400	620.52	560.996	840.485	400	250	315	422	452	560	650	1139.98	1500.02	1896.04	1685.24	1991.04	2185.99	2421.01	2571.95	2850.97	3054.1	3308.06	3489.01	4369.07	4751.96	5406.04	5885.98	6338.11	7026.13	7515.1	8124.91	8521.26	9209.68	9846.39	11192.4
23	SVK	Slovakia										0	0	0	0	0	0	0	0	0	0	0	0	0	0	0	0	0	0	0	0	0						0	0	0	0	0	0	0	0	0	0	0	0
24	SVN	Slovenia										0	0	0	0	0	0	0	0	0	0	0	0	0	0	0	0	0	0	0	0	0						0	0	0	0	0	0	0	0	0	0	0	0
25	ESP	Spain	1542	1820	1839	1630	1425	1407	1362	1355	600	650	592.427	1194.48	1557.88	1639.92	1646.28	1701.52	1843.04	1926.05	2145.14	2186.34	2330.85	2247.61	2521.11	2741.99	2962	3256.04	3812.04	4332.06	4405.06	4895.06	5326.05	5779.04	5802.06	6628.05	6444.03	7748.08	8500.05	9219.1	11807.1	13099	14954.3	15774.3	16698.8	16989.9	19436.1	22363	23659.1
26	SWE	Sweden	468	570	611	518	484	403	583	740	795.181	875.541	992.932	1184.99	700.749	645.023	823.89	922.734	1061.14	1213.51	1461.73	1550.1	1486.45	1698.37	1944	2035.05	2116.06	2351.93	2465.01	2549.95	2495.03	2446.08	2510.04	2820.1	2805.95	3011.98	3054.1	3299.02	3625.97	3775.03	3690.95	3837.11	3911.99	3958.04	4072.43	3824.82	3731.4	4213.02	3308.74
27	CHE	Switzerland	630	690	790	850					509	650	650	650	650	711	439	367	430	415	694	994.79	1000	950	1078	1314.97	1384.04	1581.03	1817.08	2117.08	2380.08	2375.98	2184.96	2682.98	3036.02	3601.07	3726.08	3580.94	4322	4039.05	4326.09	4176	4321.15	4534	4796.22	5218.88	5711.38	5754.91	5255.16
28	GBR	United Kingdom	4400	4766	5111	5986	4320	4470	5280	5900	6700	7300	7900	8900	7200	7472.95	7548.54	7081.87	4751.16	4121.1	6681.55	7071.71	8656.7	9364	9912.6	10388.4	11314	11400.1	12156	12720.1	12972.1	12156	11851.1	12790.2	13497.1	14376.1	14256.1	14060.1	16966.2	17191.1	16750.1	17577.1	17873.3	17422.2	17053.4	17892.4	18043.9	19982.1	17777.2
29	USA	USA	30445	29481	27798	21604	13166	10905	13374	13262	19400	20137.7	18279.2	21267.3	22640.7	28466.3	31610.5	23067.9	15716.8	17786.7	28403.6	32314.7	35626.5	36312.8	39273.5	42548.3	43091.7	45651.9	47048.4	53709.5	56874.9	53512.2	55660.5	60671.7	56987.1	57754.2	60023.3	62833	65729	66319.3	68523.5	65807.8	70274.9	71061.5	67679.4	73669.3	75913.2	79428.7	75179.4
30	MEX	Mexico	216	225	0	0	251.651	251.651	251.651	251.651	285.978	344.693	373.712	409.784	484.992	537.464	588.476	578.253	662.8	740.4	738	707.8	833.444	1227.6	1522.8	1614.97	1640.04	1666.99	1750.05	2015.09	2277.06	2560.01	2539.03	2709.07	3089.07	3036.02	3352.06	3762.07	4418.02	4304.09	4907	6258.12	6126.11	6787.18	7178.9	7360.31	8600.17	9784.72	10592.9
31	BRA	Brazil	88	96	87	167	149	222	324	363	483	571.452	617.896	697.793	743.634	767.506	753.833	747.409	809.908	774.378	826.382	913.525	1111.5	1281.05	1381.98	1456.02	1619.07	2029.93	2499.97	2770.98	3293.05	3376.11	3790.04	3841.04	4473.96	4708.98	5072.09	5183.98	5624	5577.1	6046.13	6404.97	7281.1	7823.12	9000.16	9801.04	11378.3	13395.5	14916.5
32	EGY	Egypt	90	180	300	240	243	288	297	379	335	330	375.763	371.941	360.832	420.107	420.98	322.859	423.902	432.088	587.577	648.353	768.283	800	1000	1130.09	947.084	1097	1335.09	1371.08	1350.96	1466.08	1512.98	1777	1852.04	2136.01	2150	2509.01	2520.95	2422.03	2629.08	2736.02	3147.06	3613.01	3683.33	3920.05	3700.56	3616.21	3263.39
33	TUR	Türkiye	59	65	57	100	108	118	168.5	131.175	177.506	214.794	267.568	283.624	266.637	272.919	210.855	151.472	285.35	288.455	323.219	350.456	344.924	372.584	386.813	396.025	458.96	528.034	707.968	821.045	969.938	1261.07	1517.07	1734.02	2037.94	2028.05	2319.02	2697.99	2940	3328.01	3865.09	4249	4728.09	5796.09	6370.77	7546.24	8422.4	8943.93	10231.9
34	IRN	Iran	0	0	0	0	0	0	0	0	55	55	55	170	55	55	55	35	38	25	42.7	42.714	64.795	58.5	64	64.9809	69.927	64.9809	62.0815	79.9896	156.057	139.001	410.011	579.029	796.997	744.978	744.978	744.978	744.978	784.717	1393.59	1394.11	1940.05	2342.04	2574.07	2849.79	2893.33	3488.32	3900.1
35	SAU	Saudi Arabia	0	0	0	0	0	0	0	0	0	0	0	0	0	0	0	0	0	0	0	0	0	0	0	0	0	0	0	0	0	0	2732.1	0	0	105.061	151.963	195.966	259.071	252.931	250.032	354.069	510.979	558.051	674.808	702.925	927.861	964.141	1020.38
36	IND	India	568	570	724.897	588	592	623	767	892	977	1142	1392	1642	1892	2142	2220	2146	2077	2180	1969	1471	1578	2136	2652	3252	3594	3840	4438.04	4559.14	5007.19	5690.1	6198.19	6921.17	7845.25	8245.2	8587.17	9355.18	9690.15	10578.2	11051	11693.7	11940.5	13260.4	13543.4	14894.2	15756	15005.7	14283.6
37	CHN	China	252	369	451.614	477.683	192	270	229	203	450	800	824	1340	1452.5	1189.1	1572	1538.25	1177.89	425	208.057	608.692	765	1218	430	1296.21	2046.64	3880.09	4600	4500.06	6422.03	6806.96	9300.12	12270.1	13500.2	10000.1	9000.11	10000.1	10500.1	11102	11128.1	8148.88	9255.26	10250.3	10231	12249	14221.8	24996.9	24996.9
38	KOR	South Korea	0	0	0	0	0	0	0	0	0	0	0	0	0	1305.98	1181.43	1400	1003	5.35	10.696	18.191	17.35	24.132	10	6.9927	35.9868	44.0028	62.0815	55.9416	46.0495	91.9284	296.081	357.992	430.989	523.088	790.004	778.066	1241.97	1613.95	1880.01	2439.94	3572.07	4865.04	5821.13	6870.52	6577.56	8172.98	8840.53
39	JPN	Japan	3841	4274	3748	3615	3731	4784	5125	5876.8	6232.21	6703.33	5519	5074	4250	5828.46	4356.02	3767.67	2995.05	1172.27	929	1236	1848	3274.57	4458	6548.06	7117.03	8767.99	10675.1	10563.1	13024.2	15176	14985.2	17268	22538.1	24636.1	28787.2	29948.2	32981.1	32689.2	38265.2	42993.3	47677.7	51387.8	57177.3	59451.1	60624.8	78101.8	73093.3
40	VNM	Vietnam	0	0	0	0	0	0	0	0	0	0	0	0	0	0	0	0	0	0	0	0	0	0	0	0	0	290.964	253.954	300.004	349.976	349.976	302.05	379.993	405.918	452.99	470.046	491.024	724	944.867	885.003	926.106	639.576	741.567	784.555	761.88	488.873	763.694	698.39
41	IDN	Indonesia	0	0	0	0	0	0	0	0	0	0	0	0	0	300	0	0	0	0	0	10	37.751	0	0	100.627	136.955	149.064	147.017	149.064	105.061	149.917	298.98	344.007	386.986	444.974	510.979	330.021	439.005	364.985	338.037	300.174	410.011	539.973	553.27	546.921	553.27	730.135	830.812
42	ZAF	South Africa										0	0	0	0	0	0	0	0	0	0	0	0	0	0	0	0	2123.05	2161.94	2336.07	2469.96	2525.05	2722.04	2646.99	2704.98	2598.04	2659.1	2884.06	3455.07	3881.97	3983.96	3810	4410	4987.16	5749.47	5854.69	6110.46	6862.36	7299.54
43	ARG	Argentina	233	350	384	536	88	77	96	65	66.8	67	67.2	67.4	67.6	67.8	68	80.9	96.445	105.035	115.41	127.815	129.867	128.075	322.071	448.044	485.054	517.971	659.019	675.051	669.082	711.038	842.023	956.976	1062.04	1071.93	649.98	883.979	785.058	739.009	659.019	669.935	866.071	949.984	924.233	964.141	961.42	1006.77	940.559
44	BRB	Barbados										0	0	0	0	0	0	0	0	0	0	0	0	0	0	0	0	0	0	0	0	0	0	0	0	0	0	0	0	0	0	0	0	0	0	0	0	0	0
45	BOL	Bolivia					11.1	11.1	11.1	11.1	11.1	11.1	18.6	24.285	24.285	24	22.579	22.675	27.6	27.174	30.742	38.828	39.13	41.546	38	39.0568	37.0101	33.9402	32.9168	38.0335	32.0641	24.0481	28.9941	28.9941	38.0335	45.0262	49.9722	62.0815	63.9576	60.0349	60.0349	62.0815	70.9503	79.9896	116.096	127.887	150.562	166.888	202.261
46	CHL	Chile	111	145	161	102	112	139	203	285	248	313.11	363.987	340.758	385.091	359.72	364.584	374.747	362.877	411.088	579.906	602.299	539.789	495.208	512.848	698.076	817.975	762.033	774.996	803.99	771.073	770.05	726.047	836.054	828.038	869.994	1146.97	1166.07	1267.04	1188.08	1364.09	1203.09	1238.05	1435.04	2040.75	1367.76	1404.04	1462.08	1423.08
47	COL	Colombia					30.005	48.639	67.273	85.907	104.541	123.175	141.809	167	188	210.912	207.793	258.578	281.626	302.598	332.265	346.227	363.749	474.726	579.977	647.933	699.952	873.064	961.922	1046.01	1219.97	1210.93	1227.99	1356.07	1465.06	1571.99	1715.94	1834.99	1971.94	2082.46	2227.94	2116.06	2367.11	2408.05	2795.37	2847.07	2891.52	3220.76	3431.18
48	CRI	Costa Rica										0	0	0	0	0	0	0	0	0	0	0	0	0	0	0	0	0	0	0	0	0	0	0	0	0	0	0	32.9168	119.046	114.953	111.03	132.008	157.933	186.842	213.145	261.216	272.1	297.496
49	CUB	Cuba								114.543	121.573	128.602	135.632	142.661	149.691	155.55	166.09	169.609	173.75	217.399	267.638	276.369	284.954	312.29	316.251	382.04	420.074	406.941	420.926	425.02	417.004	668.058	714.961	625.932	399.948	301.709	300.004	812.006	806.036	801.09	800.067	896.089	779.942	801.602	741.926	752.81	752.81	1496.55	1496.55
50	DOM	Dominican Republic										0	0	0	0	0	0	0	0	0	0	16.8	43.452	53.561	70.443	104.038	136.955	129.962	159.979	234	246.962	280.049	269.986	189.997	170.042	237.07	257.024	229.053	297.957	211.998	275.956	310.066	326.951	390.056	492.501	595.899	676.622	580.48	604.969
51	ECU	Ecuador					10	10	10	10	10	10	12	14.249	16.481	17.213	19.802	27.86	34.691	37.504	38.497	33.231	40.369	52.25	57.607	78.9663	89.029	91.0756	94.9984	145.994	151.963	155.033	159.979	157.08	201.083	218.991	193.919	258.048	288.065	325.075	437.982	429.795	434.059	456.06	331.055	369.149	349.195	485.245	499.757
52	SLV	El Salvador										0	0	0	0	0	0	0	0	0	0	0	0	0	0	0	0	35.9868	48.9489	56.9649	69.0742	84.9357	86.9823	83.0596	85.959	75.0436	63.9576	77.943	90.0523	81.013	142.071	142.924	154.01	142.071	163.26	185.935	217.68	240.355	295.682
53	GUF	French Guiana										0	0	0	0	0	0	0	0	0	0	0	0	0	0	0	0	0	0	0	0	0	0	0	0	0	0	0	0	0	0	0	0	0	0	0	0	0	0
54	GLP	Guadeloupe										0	0	0	0	0	0	0	0	0	0	0	0	0	0	0	0	0	0	0	0	0	0	0	0	0	0	0	0	0	0	0	0	0	0	0	0	0	0
55	GTM	Guatemala										19	19	19	19	19	19	21	23	29	29	27.6	31.573	35.852	41.61	56.9649	60.0349	56.9649	62.0815	78.9663	79.9896	98.0683	118.023	115.976	112.054	125.357	117	157.08	186.074	235.023	201.935	223.937	179.934	186.927	224.029	226.75	263.937	310.194	310.194
56	GUY	Guyana
57	HTI	Haiti										0	0	0	0	0	0	0	0	0	0	0	0	0	0	0	0	0	0	0	0	0	35.9868	38.0335	47.9256	44.0028	44.0028	49.9722	55.9416	41.9562	38.0335	40.0801	41.9562	49.9722	61.676	71.653	80.723	107.933	142.399
58	HND	Honduras										0	0	0	0	0	0	0	0	0	0	0	0	0	0	0	0	0	0	0	0	0	0	10.9154	33.9402	40.9329	55.9416	60.0349	72.9969	93.975	105.061	111.03	128.939	132.008	152.376	162.353	194.098	234.913	214.959
59	JAM	Jamaica										0	0	0	0	0	0	0	0	0	0	0	0	0	0	0	75.0436	100.968	98.0683	108.984	133.032	112.054	178.058	196.989	211.998	214.898	200.059	198.013	276.979	310.919	349.976	334.967	408.988	413.934	441.709	423.569	417.22	402.708	399.08
60	MTQ	Martinique										0	0	0	0	0	0	0	0	0	0	0	0	0	0	0	0	24.0481	24.0481	28.9941	41.9562	42.9795	0	0	0	0	0	0	0	0	0	0	0	0	0	0	0	0	0
61	NIC	Nicaragua										0	0	0	0		0.62	12.63	10.034	16	9.975	15.959	16.22	16.462	16.512	19.9548	18.9314	0	0	0	0	0	40.0801	34.9635	32.0641	39.0568	46.0495	54.0655	61.0582	66.0042	84.0829	96.0217	101.991	108.984	126.98	116.096	117.91	192.284	235.82
62	PAN	Panama										0	0	0	0	0	0	0	0	0	0	0	41.3	53.6	50.971	75.0436	92.9517	79.9896	76.9197	72.9969	69.927	78.9663	67.0276	97.045	108.984	113.93	107.96	142.071	125.016	165.949	149.917	150.087	164.925	173.965	243.983	281.17	294.775	433.546	394.545
63	PRY	Paraguay										0	0	0	0	0	0	0	0	0	0	0	0	0	0	0	3.92273	3.06996	6.9927	11.9388	13.9854	11.9388	6.9927	12.9621	13.9854	16.032	17.0554	18.0787	23.0247	28.9941	25.9241	13.9854	24.0481	37.0101	87.979	60.769	71.653	74.374	103.398
64	PER	Peru	48	49	25	0	21	27	46	60	75	83.048	101.38	119.986	124.48	167.872	188.882	206.792	248.537	264.892	260.617	255.644	282.373	280.5	331.297	360.039	370.954	448.897	483.008	544.919	552.082	545.942	604.954	581.929	601.031	654.073	660.042	754.017	813.029	1017.01	1069.03	1042.08	1108.94	1137.08	1131.94	1446.66	1626.25	2359.11	1730.56
65	SUR	Suriname										0	0	0	0	0	0	0	0	0	0	0	0	0	0	0	0	0	0	0	0	0	0	0	0	0	0	0	0	0	0	0	0	0	0	0	0	61.676	45.35
66	TTO	Trinidad and Tobago										0	0	0	0	0	0	0	0	0	0	0	0	0	0	0	0	0	24.0481	120.923	139.001	133.032	149.917	179.934	177.035	98.0683	17.0554	162.026	176.011	189.997	211.998	189.997	209.951	243.039	271.193	255.774	286.612	253.053	242.169
67	URY	Uruguay					157	136	106.213	99.778	111.073	147.773	158.359	164.434	137.88	179.068	150.069	131.544	165.99	216.592	272.49	280.831	287.466	293.377	304.512	301.027	300.004	296.934	296.934	266.064	339.061	417.004	433.036	421.95	414.957	389.033	374.024	340.084	411.887	430.989	478.062	420.926	515.072	466.976	497.943	457.128	4546.79	516.99	546.921
68	VEN	Venezuela					44.626	44.626	44.626	44.626	44.626	44.626	39.863	39.13	87.068	115.415	121.833	111.721	119.67	115.784	128.329	145.881	214.513	285	501.006	620.986	839.976	982.048	1212.98	1282.05	1451.07	1746.98	1616	1872	1487.06	1512.98	1510.08	1580.01	1849.99	2111.97	2114.01	2248.07	2438.06	2080.07	2649.35	2799	2981.31	3412.13	3492.86
69	ALB	Albania										14	0	0	0	14	0	0	0	0	0	0	0	0	0	16.032	17.0554	12.9621	15.0087	42.9795	75.0436	69.927	77.943	74.0203	72.9969	120.07	120.07	129.962	127.062	149.917	135.078	129.621	302.05	327.975	362.8	362.8	362.8	517.897	516.99
70	BIH	Bosnia and Herzegovina										0	0	0	0	0	0	0	0	0	0	0	0	0	0	0	0						0	0	0	0	0	0	0	0	0	0	0	0	0	0	0	0	0
71	ISL	Iceland										0	0	0	0	0	0	0	0	0	0	0	0	0	0	0	0	471.922	591.992	671.981	627.978	451.967	32.9168	77.943	72.9969	75.0436	97.045	98.0683	107.96	113.93	114.953	115.976	99.9444	92.9517	85.258	99.77	129.701	134.236	155.097
72	MKD	North Macedonia
73	SRB	Serbia										0	0	0	0	0	0	0	0	0	0	0	0	0	0	0	0	0	0	0	0	0	0	0	0	0	0	0	0	0	0	0	0	0	0	0	0	0	0
74	RUS	Russia	1903	2367	3115	3332	3481	2710	3533	4465	5845	5873	5696	5700	5800	5800	5800	5800	5800	1800	3400	4800	6600	8000	10500	12399.2	15420	15961.1	18992.2	22500.1	24900.1	29000.3	33306.2	38784.2	45520.2	51000.3	57300.4	61018.4	64934.5	72388.6	79992.5	84800.6	87513.4	89741.6	95228.7	100275	104018	109478	114977
75	UKR	Ukraine
76	BLR	Belarus
77	EST	Estonia
78	LVA	Latvia
79	LTU	Lithuania
80	GEO	Georgia
81	AZE	Azerbaijan
82	ARM	Armenia
83	KAZ	Kazakhstan
84	KGZ	Kyrgyzstan
85	TJK	Tajikistan
86	UZB	Uzbekistan
87	TKM	Turkmenistan
88	MDA	Moldova
89	DZA	Algeria	52	58		88	88	77	96	65	66.8	67	67.2	67.4	67.6	67.8	68	80.9	96.445	105.035	115.41	127.815	129.867	128.075	322.071	448.044	485.054	517.971	659.019	675.051	669.082	711.038	842.023	956.976	1062.04	1071.93	649.98	883.979	785.058	739.009	659.019	669.935	866.071	949.984	924.233	964.141	961.42	1006.77	940.559
90	AGO	Angola										0	0	0	0	0	0	0	0	0	0	0	0	0	0	0	0	28.9941	41.9562	69.927	86.9823	86.9823	165.949	155.033	161.003	157.08	163.049	193.919	214.045	245.086	264.017	279.026	311.943	383.063	449.872	529.688	616.76	768.229	760.066
91	BEN	Benin										0	0	0	0	0	0	0	0	0	0	0	0	0	0	0	0	0	0	0	0	0	0	0	0	0	0	0	0	0	0	0	0	0	0	0	0	0	0
92	BWA	Botswana
93	BFA	Burkina Faso										0	0	0	0	0	0	0	0	0	0	0	0	0	0	0	0	0	0	0	0	0	0	0	0	0	0	0	0	0	0	0	0	0	0	0	0	0	0
94	BDI	Burundi
95	CMR	Cameroon										0	0	0	0	0	0	0	0	0	0	0	0	0	0	0	0	0	0	0	0	0	10.9154	10.9154	0	0	0	0	0	0	0	0	0	0	29.931	140.585	169.609	192.284	201.354
96	TCD	Chad
97	COG	Congo (Brazzaville)	41	60	64	45						0																0	0	0	0	0	0	0	0	0	0	0	0	0	0	0	0	0	0	0	0	0	0
98	COD	Congo (Kinshasa)										0	0	0	0	0	0	0	0	0	0	0	0	0	0	0	0	0	0	0	0	0	0	0	0	0	0	245.938	224.96	247.985	264.017	259.924	0	0	0	0	0	0	0
99	CIV	Côte d'Ivoire										0	0	0	0	0	0	0	0	0	0	0	0	0	0	0	0	0	0	0	0	0	0	0	0	0	0	0	0	0	0	0	0	0	0	0	0	0	0
100	DJI	Djibouti
101	ERI	Eritrea										0	0	0	0	9	25	27.5	38	0	0	0	0	0	0	0	0	0	0	0	0	0	0	0	0	0	0	0	0	0	0	0	0	0	0	0	0	0	0
102	ETH	Ethiopia										0	0	0	0	20	20	25	0	0	0	0	8	8	6	5.96938	5.96938	10.0627	27.9708	32.0641	26.9475	32.0641	32.0641	25.0714	27.9708	30.0174	40.9329	33.9402	44.0028	96.0217	99.9444	150.087	173.965	165.949	181.4	211.331	187.749	124.259	115.189
103	GAB	Gabon										0	0	0	0	0	0	0	0	0	0	0	0	0	0	0	0	0	0	0	0	0	0	0	0	0	0	0	0	0	0	0	0	0	0	0	0	0	0
104	GHA	Ghana										0	0	0	0	0	0	0	0	0	0	0	0	0	0	0	0	0	0	0	0	0	0	0	0	0	0	0	0	0	0	0	230.077	407.964	441.709	530.595	414.499	436.267	453.5
105	GIN	Guinea
106	KEN	Kenya										0	0	0	0	0	0	0	0	0	0	0	0	0	0	19.9548	32.9168	35.9868	70.9503	130.985	186.074	206.029	216.944	313.989	353.046	330.021	346.053	344.007	421.95	484.031	484.031	479.085	543.043	641.964	791.811	793.625	897.93	791.811	856.208
107	LBR	Liberia										0	0	0	0	0	0	0	0	0	0	0	0	0	0	0	0	0	0	0	0	0	0	0	0	0	0	0	0	0	0	0	49.9722	69.927	90.7	90.7	90.7	88.886	86.165
108	LBY	Libya										0	0	0	0	0	0	0	0	0	0	0	0	0	0	0	0	0	0	0	0	0	0	0	0	0	0	0	0	0	0	0	0	49.4605	95.235	71.653	81.63	78.909	499.757
109	MDG	Madagascar										0	0	0	0	0	0	0	0	0	0	0	4	7	7	4.94605	5	0	0	0	0	0	0	0	0	0	0	0	0	0	0	0	0	0	0	0	0	0	0
110	MWI	Malawi										0	0	0	0	0	0	0	0	0	0	0	0	0	0	0	0	0	0	0	0	0	0	0	0	0	0	25.0714	31.0408	31.0408	44.0028	44.0028	55.9416	76.0669	68.932	62.583	72.56	88.886	81.63
111	MLI	Mali										0	0	0	0	0	0	0	0	0	0	0	0	0	0			0	0	0	0	0	0	0	0	0	0	0	0	0	0	0	0	0	0	0	0	47.164	45.35
112	MRT	Mauritania										0	0	0	0	0	0	0	0	0	0	0	0	0	0	0	0	0	0	0	0	0	0	0	0	0	0	0	0	0	0	0	0	0	0	0	0	0	0
113	MAR	Morocco	60	65	74	150	220	201	184	180	160	156	165	165	165	165	165	140	109.02	76.835	175.18	218.877	262.232	264	321	376.923	435.082	610.07	659.019	728.946	635.994	485.907	407.964	501.939	580.053	630.025	698.076	758.964	926.959	790.004	857.032	868.971	996.033	925.935	1404.94	1474.78	1541.9	1618.99	1747.79
114	MOZ	Mozambique	14	21	23	24	30				12	14.957	24.297	27.618	27.893	27.26	24.941	30.647	27.932	33.919	26.275	35.858	37.207	45.841	50	77.943	83.0596	86.9823	101.991	136.955	150.94	165.949	179.934	213.021	222.061	211.998	185.051	166.972	181.981	220.014	224.96	244.062	288.065	304.95	393.638	420.848	468.012	611.318	465.291
115	NAM	Namibia										0	0	0	0	0	0	0	0	0	0	0	0	0	0	0	0	0	0	0	0	0	0	0	0	0	0	0	0	0	0	0	0	0	0	0	0	0	0
116	NER	Niger										0	0	0	0	0	0	0	0	0	0	0	0	0	0	0	0	0	0	0	0	0	113.077	122.969	155.033	457.084	479.938				15.0087	22.0014	23.0247	25.0714	29.931	29.931	35.373	72.56	20.861
117	NGA	Nigeria										0	0	0	0	0	0	0	0	0	0	0	0	0	0	0	0	0	0	0	0	0	0	0	0	0	0	525.987	662.942	983.071	1002	784.035	574.083	566.067	586.829	653.947	1122.87	1221.73	1199.96
118	REU	Reunion										0	0	0	0	0	0	0	0	0	0	0	0	0	0	0	0	0	0	0	0	0	0	0	0	0	0	0	0	0	0	0	0	0	0	0	0	0	0
119	RWA	Rwanda										0	0	0	0	0	0	0	0	0	0	0	0	0	0	0	0	0	0	0	0	0	0	0	0	0	0	0	0	0	0	0	0	0	0	0	0	0	0
120	SEN	Senegal										0	0	0	0	0	0	0	0	0	0	0	0	0	0	0	0	0	0	0	0	0	149.064	173.965	167.995	181.981	183.004	189.997	205.005	180.957	193.919	174.988	201.935	207.052	241.262	241.262	335.59	295.682	331.962
121	SLE	Sierra Leone										0	0	0	0	0	0	0	0	0	0	0	0	0	0	0	0	0	0	0	0	0	0	0	0	0	0	0	0	0	0	0	44.0028	35.9868	29.931	0	0	0	0
122	SDN	Sudan										0	0	0	0	0	0	0	0	0	0	0	0	0	0	0	0	0	0	0	0	0	89.029	99.9444	120.923	83.0596	84.9357	115.976	91.0756	79.9896	99.9444	90.0523	144.971	174.988	156.004	168.702	158.725	207.703	300.217
123	TZA	Tanzania										0	0	0	0	0	0	0	0	0	0	0	0	0	0	0	0	0	0	0	0	0	0	0	0	0	0	0	0	0	47.9256	149.064	156.057	170.042	166.888	177.772	236.727	313.822	295.682
124	TGO	Togo										0	0	0	0	0	0	0	0	0	0	0	0	0	0	0	0	0	0	0	0	0	0	0	0	0	0	0	0	0	0	0	0	0	0	0	0	114.282	127.887
125	TUN	Tunisia					3	39	34.3	39.7	48.6	56.4	68.7	68.7	68.7	57.2	56.3	23	58.5	59.6	83.54	115.1	161.7	167.631	169.2	186.927	208.075	225.984	283.972	383.063	360.039	400.972	345.03	442.075	405.065	359.015	362.938	361.062	455.037	454.014	478.062	471.922	508.932	603.078	546.921	584.108	628.551	524.246	539.665
126	UGA	Uganda										0	0	0	0	0	0	0	0	0	0	0	0	0	0	0	0	23.0247	41.9562	49.9722	61.0582	85.959	104.038	82.0363	71.9736	62.9343	55.9416	54.9183	72.9969	130.985	120.923	139.001	155.033	172.941	188.656	202.261	165.981	143.306	153.283
127	ZMB	Zambia										0	0	0	0	0	0	0	0	0	0	0	0	0	0	0	0	0	0	0	0	0	0	0	0	0	0	115.976	150.94	221.037	220.014	244.062	340.937	252.931	178.679	470.733	485.245	411.778	380.94
128	ZWE	Zimbabwe										0	0	0	0	0	0	0	0	69.4	66.4	71.2	69	0	0	169.019	247.985	323.029	397.049	494.094	513.025	726.047	795.974	595.062	600.008	437.982	399.948	250.032	250.032	250.032	250.032	250.032	339.061	382.04	475.268	558.712	598.62	0	0
129	AFG	Afghanistan
130	BHR	Bahrain										0	0	0	0	0	0	0	0	0	0	0	0	0	0	0	0	0	0	0	0	0	0	0	0	0	0	0	0	0	0	0	0	0	0	0	0	0	0
131	IRQ	Iraq										0	0	0	0	0	0	0	0	0	0	0	0	7.007	66.051	75.0436	104.038	177.035	198.013	317.059	490	603.93	669.082	661.066	618.086	937.021	920.989	940.944	1092.05	1284.95	1342.09	1599.96	1398.54	1398.54	1360.5	1360.5	1360.5	1814	1814
132	ISR	Israel										0	0	0	0	0	0	0	0	147.237	265.935	328.394	159.865	241.393	380.128	439.005	445.998	464.929	562.997	699.952	612.97	719.054	713.085	780.965	806.036	845.946	954.077	1021.96	1098.02	1260.05	1167.95	805.013	1106.04	1307.98	1384.08	1404.94	1451.2	1258.01	1795.86
133	JOR	Jordan										0	0	0	0	0	0	0	0	0	0	0	0	0	0	0	0	0	62.9343	84.9357	90.0523	106.937	113.93	110.007	164.925	223.084	235.023	284.995	308.02	304.95	375.047	300.174	479.938	381.017	378.219	419.034	399.987	616.76	595.899
134	XKX	Kosovo
135	KWT	Kuwait										0	0	0	0	0	0	0	0	0	0	0	0	0	0	0	0	0	0	0	0	0	0	0	0	0	0	0	0	0	0	0	0	0	0	0	0	0	0
136	LBN	Lebanon																															507.056	742.931	853.962	874.087	860.955	896.089	881.08	969.938	1095.98	1015.99	905.981	1253.06	1338.73	1498.36	1625.34	1658.9	1743.25
137	OMN	Oman										0	0	0	0	0	0	0	0	0	0	0	0	0	0	0	0	0	0	0	0	0	0	0	0	0	0	0	0	0	0	0	0	0	0	0	0	0	0
138	PSE	Palestine					100	135	143	187	165	158	98.446	112.35	148.487	114.841	216.577	166.804	176.499	147.237	265.935
139	QAT	Qatar										0	0	0	0	0	0	0	0	0	0	0	0	0	0	0	0	0	0	0	0	0	0	0	0	0	0	0	0	0	0	0	0	136.443	253.96	253.96	253.96	99.77	99.77
140	SYR	Syria										0	0	0	0	0	0	0	0	0	0	0	0	0	0	0	0	0	0	0	0	0	386.986	447.021	488.977	539.973	598.984	684.943	634.971	674.028	617.063	688.013	916.043	933.952	964.141	908.814	1055.75	848.045	965.048
141	ARE	United Arab Emiratese										0	0	0	0	0	0	0	0	0	0	0	0	0	0	0	0	0	0	0	0	0	0	0	0	0	0	0	0	0	0	0	0	0	0	0	0	0	0
142	YEM	Yemen										0	0	0	0	0	0	0	0	0	0	0	0	0	0	0	0	0	0	0	0	0	0	0	0	0	0	0	0	0	0	0	0	0	0	0	0	11.791	36.28
143	BGD	Bangladesh										0	0	0	0	0	0	0	0	0	0	0	0	0	0			0	0	0	0	0	0	0	0	0	0	0	0	0	0	0	0	0	0	0	0	29.931	87.072
144	BTN	Bhutan										0	0	0	0	0	0	0	0							0	0	0	0	0	0	0	0	0	0	0	0	0	0	0	0	0	0	0	0	0	0	0	0
145	MMR	Burma										0	0	0	0	0	0	0	0	0	0	0	0	0	0	17.0554	40.9329	40.9329	61.0582	60.0349	39.0568	34.9635	35.9868	35.9868	45.0262	40.0801	40.0801	123.992	130.985	135.078	141.048	129.962	176.011	183.004	166.888	196.819	185.028	189.563	168.702
146	NPL	Nepal										0	0	0	0	0	0	0	0	0	0	0	0	0	0	0	0	0	0	0	0	0	0	0	0	0	0	0	0	0	0	0	0	0	0	0	0	0	0
147	PAK	Pakistan										0	0	0	0	0	0	0	0	0	0	0	327.168	431	421	507.056	544	605.977	683.92	692.959	786.082	1094.95	1090.01	1002	1159.08	1242.99	1394.96	1497.97	1546.07	1707.07	1885.98	2039.99	2437.04	2678.03	2570.44	2620.32	2693.79	2874.28	3447.51
148	LKA	Sri Lanka										0	0	0	0	0	0	0	0	0	0	0	0	0	0	62.9343	61.0582	63.9576	84.0829	76.0669	84.9357	48.9489	79.9896	94.9984	84.9357	82.0363	84.9357	75.0436	75.0436	85.959	83.0596	192.043	221.89	282.948	325.613	385.475	382.754	421.755	473.454
149	HKG	Hong Kong										0	110.036	0	0	110	110	110	110	110	110	34.22	53.2	58.7	68.4	70.9503	68.0509	63.9576	99.9444	117	120.923	104.038	151.963	142.071	149.917	184.027	211.998	216.944	215.068	240.992	246.962	215.068	375.047	377.947	429.918	511.548	413.592	440.802	570.503
150	PRK	Korea, North										0	0	0	0	0	0	0	0	133.7	150	150	0	0	0	0	0	300.004	500.063	360.039	600.008	600.008	1224.06	1926.06	2285.08	2262.05	2375.98	2529.99	2609.98	2400.03	2499.97	2592.41	2694.75	3001.74	4008.94	4798.03	5296.88	5804.8	5986.2
151	MNG	Mongolia										0	0	0	0	0	0	0	0	0	0	0	0	0	0	0	0	0	0	0	0	0	0	0	0	0	0	0	0	0	0	0	75.0436	119.388	96.142	95.235	95.235	146.027	170.516
152	TWN	Taiwan										0	0	0	0	212.28	228.107	309.394	245	425	208.057	608.692	235	280.8	332	389.033	445.998	520.018	536.05	589.945	589.945	603.93	1014.96	1066.98	1182.96	1504.96	1860.06	2246.02	2355	2444.03	3112.09	3486.97	3993	4088	4303.72	5042.01	5688.7	6095.04	6169.41
153	BRN	Brunei										0	0	0	0	0	0	0	0									0	0	0	0	0	0	0	0	0	0	0	0	0	0	0	0	0	0	0	0	0	0
154	KHM	Cambodia										0	0	0	0	0	0	0	0	0	0	0	0	0	0	0	0	0	0	0	0	0	0	0	0	0	0	0	10.0627	49.9722	59.0115	60.0349	59.6938	59.6938	38.094	58.955	98.863	78.002	49.885
155	LAO	Laos										0	0	0	0	0	0	0	0	0	0	0	0	0	0	0	0	0	0	0	0	0	0	0	0	0	0	0	0	0	0	0	0	0	0	0	0	0	0
156	MYS	Malaysia										0	0	0	0	0	0	0	0	0	0	0	0	0	0	0	0	32.0641	85.959	108.984	104.038	113.93	110.007	193.067	286.018	331.045	318.082	362.085	465.952	739.009	850.039	835.03	937.021	973.008	1029.44	1095.66	1059.38	1277.96	1364.13
157	PHL	Philippines	65				114	95				148	167.448	186.896	206.344	184.75	163.156	141.562	119.968	27.231	56.261	133.918	120.384	201.089	292.051	309.043	310.066	290.964	310.066	399.948	436.958	510.979	641.964	727.07	794.95	1019.06	961.07	951.007	1201.04	1529.01	1613.1	2111.97	2564.1	2950.07	2446.18	2813.51	2902.4	4057.92	3501.93
158	SGP	Singapore																					0	0	0			0	0	0	0	0	0	0	0	0	0	193.919	200.059	202.959	388.009	471.069	567.091	623.032	725.6	613.132	1008.58	1027.63	1088.4
159	THA	Thailand					52	44	51	49	62	77	82	92	116.864	117	0	0	0	0	0	58.8	82.8	127.2	165.6	311.943	246.962	288.065	384.087	385.963	398.072	401.995	456.06	509.955	525.987	796.997	962.946	996.033	1059.99	1248.96	1482.96	1737.09	2365.07	2403.1	2626.67	2778.14	3391.27	3705.09	3921.87
160	NZL	New Zealand					149	174	183	191	194	750	220	235	265	302.929	270.524	270.33	226.8	237.6	229.9	219.409	247.205	254.039	255.528	163	0	280.049	323.029	408.988	450.944	449.92	560.951	561.974	617.063	651.003	631.048	721.953	787.958	842.023	878.01	814.052	763.057	802.966	828.998	822.649	899.744	1057.56	1110.17
161	FJI	Fiji										0	0	0	0	0	0	0	0	0	0	0	0	0	0	0	0	0	0	0	0	0	0	0	0	0	0	0	31.0408	40.0801	40.9329	47.0728	50.9955	54.9183	58.955	78.002	88.886	91.607	85.258
162	NCL	New Caledonia										0	0	0	0	0	0	0	0	0	0	0	0	0	0	0	0	0	0	0	0	0	0	0	0	0	0	0	0	0	0	0	0	0	0	0	0	52.606	66.211
163	PNG	Papua New Guineae
		Cement production from 1930 to 2022 is from USGS. Cement Statistics and Information. http://minerals.usgs.gov/minerals/pubs/commodity/cement/index.html (2024).
		Cement production in 2023 are from USGS. Cement Statistics and Information. http://minerals.usgs.gov/minerals/pubs/commodity/cement/index.html (2024). And OneStone Consulting. Cement Market Report for 130 countries, 2 Updates per year. https://ccf2up.com (2024).
		Cement production in 2024 are projected by autoregressive integrated moving average (ARIMA).
[truncated: 50 more columns]

## Sheet: SI data2
SI data 2. Clinker-to-cement ratios for 163 countries and regions, 1928-2023
code	ISO	countries and regions	1928	1929	1930	1931	1932	1933	1934	1935	1936	1937	1938	1939	1940	1941	1942	1943	1944	1945	1946	1947	1948	1949	1950	1951	1952	1953	1954	1955	1956	1957	1958	1959	1960	1961	1962	1963	1964	1965	1966	1967	1968	1969	1970	1971	1972	1973	1974
1	AUS	Australia	0.95	0.95	0.95	0.95	0.95	0.95	0.95	0.95	0.95	0.95	0.95	0.95	0.95	0.95	0.95	0.95	0.95	0.95	0.95	0.95	0.95	0.95	0.95	0.95	0.95	0.95	0.95	0.95	0.95	0.95	0.95	0.95	0.95	0.95	0.95	0.95	0.95	0.95	0.95	0.95	0.95	0.95	0.95	0.928629	0.907257	0.885886	0.864514
2	AUT	Austria	0.95	0.95	0.95	0.95	0.95	0.95	0.95	0.95	0.95	0.95	0.95	0.95	0.95	0.95	0.95	0.95	0.95	0.95	0.95	0.95	0.95	0.95	0.95	0.95	0.95	0.95	0.95	0.95	0.95	0.95	0.95	0.95	0.95	0.95	0.95	0.95	0.95	0.95	0.95	0.95	0.95	0.95	0.95	0.95	0.95	0.95	0.95
3	BEL	Belgium	0.95	0.95	0.95	0.95	0.95	0.95	0.95	0.95	0.95	0.95	0.95	0.95	0.95	0.95	0.95	0.95	0.95	0.95	0.95	0.95	0.95	0.95	0.95	0.95	0.95	0.95	0.95	0.95	0.95	0.95	0.95	0.95	0.95	0.95	0.95	0.95	0.95	0.95	0.95	0.95	0.95	0.95	0.95	0.940683	0.931365	0.922048	0.91273
4	BGR	Bulgaria	0.95	0.95	0.95	0.95	0.95	0.95	0.95	0.95	0.95	0.95	0.95	0.95	0.95	0.95	0.95	0.95	0.95	0.95	0.95	0.95	0.95	0.95	0.95	0.95	0.95	0.95	0.95	0.95	0.95	0.95	0.95	0.95	0.95	0.95	0.95	0.95	0.95	0.95	0.95	0.95	0.95	0.95	0.95	0.944821	0.939642	0.934462	0.929283
5	CAN	Canada	0.95	0.95	0.95	0.95	0.95	0.95	0.95	0.95	0.95	0.95	0.95	0.95	0.95	0.95	0.95	0.95	0.95	0.95	0.95	0.95	0.95	0.95	0.95	0.95	0.95	0.95	0.95	0.95	0.95	0.95	0.95	0.95	0.95	0.95	0.95	0.95	0.95	0.95	0.95	0.95	0.95	0.95	0.95	0.947415	0.944829	0.942244	0.939658
6	HRV	Croatia	0.95	0.95	0.95	0.95	0.95	0.95	0.95	0.95	0.95	0.95	0.95	0.95	0.95	0.95	0.95	0.95	0.95	0.95	0.95	0.95	0.95	0.95	0.95	0.95	0.95	0.95	0.95	0.95	0.95	0.95	0.95	0.95	0.95	0.95	0.95	0.95	0.95	0.95	0.95	0.95	0.95	0.95	0.95	0.947087	0.944174	0.941261	0.938349
7	CYP	Cyprus	0.95	0.95	0.95	0.95	0.95	0.95	0.95	0.95	0.95	0.95	0.95	0.95	0.95	0.95	0.95	0.95	0.95	0.95	0.95	0.95	0.95	0.95	0.95	0.95	0.95	0.95	0.95	0.95	0.95	0.95	0.95	0.95	0.95	0.95	0.95	0.95	0.95	0.95	0.95	0.95	0.95	0.95	0.95	0.95	0.95	0.95	0.95
8	CZE	Czechia	0.95	0.95	0.95	0.95	0.95	0.95	0.95	0.95	0.95	0.95	0.95	0.95	0.95	0.95	0.95	0.95	0.95	0.95	0.95	0.95	0.95	0.95	0.95	0.95	0.95	0.95	0.95	0.95	0.95	0.95	0.95	0.95	0.95	0.95	0.95	0.95	0.95	0.95	0.95	0.95	0.95	0.95	0.95	0.924393	0.898786	0.87318	0.847573
9	DNK	Denmark	0.95	0.95	0.95	0.95	0.95	0.95	0.95	0.95	0.95	0.95	0.95	0.95	0.95	0.95	0.95	0.95	0.95	0.95	0.95	0.95	0.95	0.95	0.95	0.95	0.95	0.95	0.95	0.95	0.95	0.95	0.95	0.95	0.95	0.95	0.95	0.95	0.95	0.95	0.95	0.95	0.95	0.95	0.95	0.937736	0.925473	0.913209	0.900945
10	FIN	Finland	0.95	0.95	0.95	0.95	0.95	0.95	0.95	0.95	0.95	0.95	0.95	0.95	0.95	0.95	0.95	0.95	0.95	0.95	0.95	0.95	0.95	0.95	0.95	0.95	0.95	0.95	0.95	0.95	0.95	0.95	0.95	0.95	0.95	0.95	0.95	0.95	0.95	0.95	0.95	0.95	0.95	0.95	0.95	0.950163	0.950325	0.950488	0.95065
11	FRA	France	0.95	0.95	0.95	0.95	0.95	0.95	0.95	0.95	0.95	0.95	0.95	0.95	0.95	0.95	0.95	0.95	0.95	0.95	0.95	0.95	0.95	0.95	0.95	0.95	0.95	0.95	0.95	0.95	0.95	0.95	0.95	0.95	0.95	0.95	0.95	0.95	0.95	0.95	0.95	0.95	0.95	0.95	0.95	0.945882	0.941763	0.937645	0.933527
12	DEU	Germany	0.95	0.95	0.95	0.95	0.95	0.95	0.95	0.95	0.95	0.95	0.95	0.95	0.95	0.95	0.95	0.95	0.95	0.95	0.95	0.95	0.95	0.95	0.95	0.95	0.95	0.95	0.95	0.95	0.95	0.95	0.95	0.95	0.95	0.95	0.95	0.95	0.95	0.95	0.95	0.95	0.95	0.95	0.95	0.940796	0.931592	0.922387	0.913183
13	GRC	Greece	0.95	0.95	0.95	0.95	0.95	0.95	0.95	0.95	0.95	0.95	0.95	0.95	0.95	0.95	0.95	0.95	0.95	0.95	0.95	0.95	0.95	0.95	0.95	0.95	0.95	0.95	0.95	0.95	0.95	0.95	0.95	0.95	0.95	0.95	0.95	0.95	0.95	0.95	0.95	0.95	0.95	0.95	0.95	0.945024	0.940048	0.935072	0.930096
14	HUN	Hungary	0.95	0.95	0.95	0.95	0.95	0.95	0.95	0.95	0.95	0.95	0.95	0.95	0.95	0.95	0.95	0.95	0.95	0.95	0.95	0.95	0.95	0.95	0.95	0.95	0.95	0.95	0.95	0.95	0.95	0.95	0.95	0.95	0.95	0.95	0.95	0.95	0.95	0.95	0.95	0.95	0.95	0.95	0.95	0.942722	0.935444	0.928166	0.920888
15	IRL	Ireland	0.95	0.95	0.95	0.95	0.95	0.95	0.95	0.95	0.95	0.95	0.95	0.95	0.95	0.95	0.95	0.95	0.95	0.95	0.95	0.95	0.95	0.95	0.95	0.95	0.95	0.95	0.95	0.95	0.95	0.95	0.95	0.95	0.95	0.95	0.95	0.95	0.95	0.95	0.95	0.95	0.95	0.95	0.95	0.951895	0.953789	0.955684	0.957578
16	ITA	Italy	0.95	0.95	0.95	0.95	0.95	0.95	0.95	0.95	0.95	0.95	0.95	0.95	0.95	0.95	0.95	0.95	0.95	0.95	0.95	0.95	0.95	0.95	0.95	0.95	0.95	0.95	0.95	0.95	0.95	0.95	0.95	0.95	0.95	0.95	0.95	0.95	0.95	0.95	0.95	0.95	0.95	0.95	0.95	0.939732	0.929464	0.919196	0.908928
17	LUX	Luxembourg	0.95	0.95	0.95	0.95	0.95	0.95	0.95	0.95	0.95	0.95	0.95	0.95	0.95	0.95	0.95	0.95	0.95	0.95	0.95	0.95	0.95	0.95	0.95	0.95	0.95	0.95	0.95	0.95	0.95	0.95	0.95	0.95	0.95	0.95	0.95	0.95	0.95	0.95	0.95	0.95	0.95	0.95	0.95	0.95	0.95	0.95	0.95
18	NLD	Netherlands	0.95	0.95	0.95	0.95	0.95	0.95	0.95	0.95	0.95	0.95	0.95	0.95	0.95	0.95	0.95	0.95	0.95	0.95	0.95	0.95	0.95	0.95	0.95	0.95	0.95	0.95	0.95	0.95	0.95	0.95	0.95	0.95	0.95	0.95	0.95	0.95	0.95	0.95	0.95	0.95	0.95	0.95	0.95	0.912822	0.875643	0.838465	0.801287
19	NOR	Norway	0.95	0.95	0.95	0.95	0.95	0.95	0.95	0.95	0.95	0.95	0.95	0.95	0.95	0.95	0.95	0.95	0.95	0.95	0.95	0.95	0.95	0.95	0.95	0.95	0.95	0.95	0.95	0.95	0.95	0.95	0.95	0.95	0.95	0.95	0.95	0.95	0.95	0.95	0.95	0.95	0.95	0.95	0.95	0.947619	0.945239	0.942858	0.940478
20	POL	Poland	0.95	0.95	0.95	0.95	0.95	0.95	0.95	0.95	0.95	0.95	0.95	0.95	0.95	0.95	0.95	0.95	0.95	0.95	0.95	0.95	0.95	0.95	0.95	0.95	0.95	0.95	0.95	0.95	0.95	0.95	0.95	0.95	0.95	0.95	0.95	0.95	0.95	0.95	0.95	0.95	0.95	0.95	0.95	0.93289	0.915781	0.898671	0.881562
21	PRT	Portugal	0.95	0.95	0.95	0.95	0.95	0.95	0.95	0.95	0.95	0.95	0.95	0.95	0.95	0.95	0.95	0.95	0.95	0.95	0.95	0.95	0.95	0.95	0.95	0.95	0.95	0.95	0.95	0.95	0.95	0.95	0.95	0.95	0.95	0.95	0.95	0.95	0.95	0.95	0.95	0.95	0.95	0.95	0.95	0.95	0.95	0.95	0.95
22	ROU	Romania	0.95	0.95	0.95	0.95	0.95	0.95	0.95	0.95	0.95	0.95	0.95	0.95	0.95	0.95	0.95	0.95	0.95	0.95	0.95	0.95	0.95	0.95	0.95	0.95	0.95	0.95	0.95	0.95	0.95	0.95	0.95	0.95	0.95	0.95	0.95	0.95	0.95	0.95	0.95	0.95	0.95	0.95	0.95	0.934801	0.919602	0.904404	0.889205
23	SVK	Slovakia	0.95	0.95	0.95	0.95	0.95	0.95	0.95	0.95	0.95	0.95	0.95	0.95	0.95	0.95	0.95	0.95	0.95	0.95	0.95	0.95	0.95	0.95	0.95	0.95	0.95	0.95	0.95	0.95	0.95	0.95	0.95	0.95	0.95	0.95	0.95	0.95	0.95	0.95	0.95	0.95	0.95	0.95	0.95	0.943339	0.936678	0.930017	0.923357
24	SVN	Slovenia	0.95	0.95	0.95	0.95	0.95	0.95	0.95	0.95	0.95	0.95	0.95	0.95	0.95	0.95	0.95	0.95	0.95	0.95	0.95	0.95	0.95	0.95	0.95	0.95	0.95	0.95	0.95	0.95	0.95	0.95	0.95	0.95	0.95	0.95	0.95	0.95	0.95	0.95	0.95	0.95	0.95	0.95	0.95	0.941695	0.933391	0.925086	0.916782
25	ESP	Spain	0.95	0.95	0.95	0.95	0.95	0.95	0.95	0.95	0.95	0.95	0.95	0.95	0.95	0.95	0.95	0.95	0.95	0.95	0.95	0.95	0.95	0.95	0.95	0.95	0.95	0.95	0.95	0.95	0.95	0.95	0.95	0.95	0.95	0.95	0.95	0.95	0.95	0.95	0.95	0.95	0.95	0.95	0.95	0.948862	0.947724	0.946586	0.945448
26	SWE	Sweden	0.95	0.95	0.95	0.95	0.95	0.95	0.95	0.95	0.95	0.95	0.95	0.95	0.95	0.95	0.95	0.95	0.95	0.95	0.95	0.95	0.95	0.95	0.95	0.95	0.95	0.95	0.95	0.95	0.95	0.95	0.95	0.95	0.95	0.95	0.95	0.95	0.95	0.95	0.95	0.95	0.95	0.95	0.95	0.952284	0.954567	0.956851	0.959135
27	CHE	Switzerland	0.95	0.95	0.95	0.95	0.95	0.95	0.95	0.95	0.95	0.95	0.95	0.95	0.95	0.95	0.95	0.95	0.95	0.95	0.95	0.95	0.95	0.95	0.95	0.95	0.95	0.95	0.95	0.95	0.95	0.95	0.95	0.95	0.95	0.95	0.95	0.95	0.95	0.95	0.95	0.95	0.95	0.95	0.95	0.946676	0.943353	0.940029	0.936706
28	GBR	United Kingdom	0.95	0.95	0.95	0.95	0.95	0.95	0.95	0.95	0.95	0.95	0.95	0.95	0.95	0.95	0.95	0.95	0.95	0.95	0.95	0.95	0.95	0.95	0.95	0.95	0.95	0.95	0.95	0.95	0.95	0.95	0.95	0.95	0.95	0.95	0.95	0.95	0.95	0.95	0.95	0.95	0.95	0.95	0.95	0.949639	0.949279	0.948918	0.948557
29	USA	USA
30	MEX	Mexico	0.95	0.95	0.95	0.95	0.95	0.95	0.95	0.95	0.95	0.95	0.95	0.95	0.95	0.95	0.95	0.95	0.95	0.95	0.95	0.95	0.95	0.95	0.95	0.95	0.95	0.95	0.95	0.95	0.95	0.95	0.95	0.95	0.95	0.95	0.95	0.95	0.95	0.95	0.95	0.95	0.95	0.95	0.95	0.942178	0.934355	0.926533	0.91871
31	BRA	Brazil	0.95	0.95	0.95	0.95	0.95	0.95	0.95	0.95	0.95	0.95	0.95	0.95	0.95	0.95	0.95	0.95	0.95	0.95	0.95	0.95	0.95	0.95	0.95	0.95	0.95	0.95	0.95	0.95	0.95	0.95	0.95	0.95	0.95	0.95	0.95	0.95	0.95	0.95	0.95	0.95	0.95	0.95	0.86	0.86	0.86	0.86	0.86
32	EGY	Egypt	0.95	0.95	0.95	0.95	0.95	0.95	0.95	0.95	0.95	0.95	0.95	0.95	0.95	0.95	0.95	0.95	0.95	0.95	0.95	0.95	0.95	0.95	0.95	0.95	0.95	0.95	0.95	0.95	0.95	0.95	0.95	0.95	0.95	0.95	0.95	0.95	0.95	0.95	0.95	0.95	0.95	0.95	0.95	0.947	0.944	0.941	0.938
33	TUR	Türkiye	0.95	0.95	0.95	0.95	0.95	0.95	0.95	0.95	0.95	0.95	0.95	0.95	0.95	0.95	0.95	0.95	0.95	0.95	0.95	0.95	0.95	0.95	0.95	0.95	0.95	0.95	0.95	0.95	0.95	0.95	0.95	0.95	0.95	0.95	0.95	0.95	0.95	0.95	0.95	0.95	0.95	0.95	0.95	0.944471	0.938942	0.933413	0.927884
34	IRN	Iran	0.95	0.95	0.95	0.95	0.95	0.95	0.95	0.95	0.95	0.95	0.95	0.95	0.95	0.95	0.95	0.95	0.95	0.95	0.95	0.95	0.95	0.95	0.95	0.95	0.95	0.95	0.95	0.95	0.95	0.95	0.95	0.95	0.95	0.95	0.95	0.95	0.95	0.95	0.95	0.95	0.95	0.95	0.95	0.948	0.946	0.944	0.942
35	SAU	Saudi Arabia	0.95	0.95	0.95	0.95	0.95	0.95	0.95	0.95	0.95	0.95	0.95	0.95	0.95	0.95	0.95	0.95	0.95	0.95	0.95	0.95	0.95	0.95	0.95	0.95	0.95	0.95	0.95	0.95	0.95	0.95	0.95	0.95	0.95	0.95	0.95	0.95	0.95	0.95	0.95	0.95	0.95	0.95	0.95	0.9491	0.948199	0.947299	0.946399
36	IND	India	0.95	0.95	0.95	0.95	0.95	0.95	0.95	0.95	0.95	0.95	0.95	0.95	0.95	0.95	0.95	0.95	0.95	0.95	0.95	0.95	0.95	0.95	0.95	0.95	0.95	0.95	0.95	0.95	0.95	0.95	0.95	0.95	0.95	0.95	0.95	0.95	0.95	0.95	0.95	0.95	0.95	0.95	0.95	0.945823	0.941646	0.937469	0.933293
37	CHN	China	0.95	0.95	0.95	0.95	0.95	0.95	0.95	0.95	0.95	0.95	0.95	0.95	0.95	0.95	0.95	0.95	0.95	0.95	0.95	0.95	0.95	0.95	0.95	0.95	0.95	0.95	0.95	0.95	0.95	0.95	0.95	0.95	0.95	0.95	0.95	0.95	0.95	0.95	0.95	0.95	0.95	0.95	0.95	0.93412	0.91824	0.90236	0.88648
38	KOR	South Korea	0.95	0.95	0.95	0.95	0.95	0.95	0.95	0.95	0.95	0.95	0.95	0.95	0.95	0.95	0.95	0.95	0.95	0.95	0.95	0.95	0.95	0.95	0.95	0.95	0.95	0.95	0.95	0.95	0.95	0.95	0.95	0.95	0.95	0.95	0.95	0.95	0.95	0.95	0.95	0.95	0.95	0.95	0.95	0.948269	0.946538	0.944807	0.943076
39	JPN	Japan	0.95	0.95	0.95	0.95	0.95	0.95	0.95	0.95	0.95	0.95	0.95	0.95	0.95	0.95	0.95	0.95	0.95	0.95	0.95	0.95	0.95	0.95	0.95	0.95	0.95	0.95	0.95	0.95	0.95	0.95	0.95	0.95	0.95	0.95	0.95	0.95	0.95	0.95	0.95	0.95	0.95	0.95	0.95	0.949	0.947999	0.946999	0.945998
40	VNM	Vietnam	0.95	0.95	0.95	0.95	0.95	0.95	0.95	0.95	0.95	0.95	0.95	0.95	0.95	0.95	0.95	0.95	0.95	0.95	0.95	0.95	0.95	0.95	0.95	0.95	0.95	0.95	0.95	0.95	0.95	0.95	0.95	0.95	0.95	0.95	0.95	0.95	0.95	0.95	0.95	0.95	0.95	0.95	0.95	0.946875	0.94375	0.940625	0.9375
41	IDN	Indonesia	0.95	0.95	0.95	0.95	0.95	0.95	0.95	0.95	0.95	0.95	0.95	0.95	0.95	0.95	0.95	0.95	0.95	0.95	0.95	0.95	0.95	0.95	0.95	0.95	0.95	0.95	0.95	0.95	0.95	0.95	0.95	0.95	0.95	0.95	0.95	0.95	0.95	0.95	0.95	0.95	0.95	0.95	0.95	0.95	0.95	0.95	0.95
42	ZAF	South Africa	0.95	0.95	0.95	0.95	0.95	0.95	0.95	0.95	0.95	0.95	0.95	0.95	0.95	0.95	0.95	0.95	0.95	0.95	0.95	0.95	0.95	0.95	0.95	0.95	0.95	0.95	0.95	0.95	0.95	0.95	0.95	0.95	0.95	0.95	0.95	0.95	0.95	0.95	0.95	0.95	0.95	0.95	0.95	0.947	0.944	0.941	0.938
43	ARG	Argentina	0.95	0.95	0.95	0.95	0.95	0.95	0.95	0.95	0.95	0.95	0.95	0.95	0.95	0.95	0.95	0.95	0.95	0.95	0.95	0.95	0.95	0.95	0.95	0.95	0.95	0.95	0.95	0.95	0.95	0.95	0.95	0.95	0.95	0.95	0.95	0.95	0.95	0.95	0.95	0.95	0.95	0.95	0.95	0.9435	0.937	0.9305	0.924
44	BRB	Barbados	0.95	0.95	0.95	0.95	0.95	0.95	0.95	0.95	0.95	0.95	0.95	0.95	0.95	0.95	0.95	0.95	0.95	0.95	0.95	0.95	0.95	0.95	0.95	0.95	0.95	0.95	0.95	0.95	0.95	0.95	0.95	0.95	0.95	0.95	0.95	0.95	0.95	0.95	0.95	0.95	0.95	0.95	0.95	0.9435	0.937	0.9305	0.924
45	BOL	Bolivia	0.95	0.95	0.95	0.95	0.95	0.95	0.95	0.95	0.95	0.95	0.95	0.95	0.95	0.95	0.95	0.95	0.95	0.95	0.95	0.95	0.95	0.95	0.95	0.95	0.95	0.95	0.95	0.95	0.95	0.95	0.95	0.95	0.95	0.95	0.95	0.95	0.95	0.95	0.95	0.95	0.95	0.95	0.95	0.9435	0.937	0.9305	0.924
46	CHL	Chile	0.95	0.95	0.95	0.95	0.95	0.95	0.95	0.95	0.95	0.95	0.95	0.95	0.95	0.95	0.95	0.95	0.95	0.95	0.95	0.95	0.95	0.95	0.95	0.95	0.95	0.95	0.95	0.95	0.95	0.95	0.95	0.95	0.95	0.95	0.95	0.95	0.95	0.95	0.95	0.95	0.95	0.95	0.95	0.9435	0.937	0.9305	0.924
47	COL	Colombia	0.95	0.95	0.95	0.95	0.95	0.95	0.95	0.95	0.95	0.95	0.95	0.95	0.95	0.95	0.95	0.95	0.95	0.95	0.95	0.95	0.95	0.95	0.95	0.95	0.95	0.95	0.95	0.95	0.95	0.95	0.95	0.95	0.95	0.95	0.95	0.95	0.95	0.95	0.95	0.95	0.95	0.95	0.95	0.9435	0.937	0.9305	0.924
48	CRI	Costa Rica	0.95	0.95	0.95	0.95	0.95	0.95	0.95	0.95	0.95	0.95	0.95	0.95	0.95	0.95	0.95	0.95	0.95	0.95	0.95	0.95	0.95	0.95	0.95	0.95	0.95	0.95	0.95	0.95	0.95	0.95	0.95	0.95	0.95	0.95	0.95	0.95	0.95	0.95	0.95	0.95	0.95	0.95	0.95	0.9435	0.937	0.9305	0.924
49	CUB	Cuba	0.95	0.95	0.95	0.95	0.95	0.95	0.95	0.95	0.95	0.95	0.95	0.95	0.95	0.95	0.95	0.95	0.95	0.95	0.95	0.95	0.95	0.95	0.95	0.95	0.95	0.95	0.95	0.95	0.95	0.95	0.95	0.95	0.95	0.95	0.95	0.95	0.95	0.95	0.95	0.95	0.95	0.95	0.95	0.9435	0.937	0.9305	0.924
50	DOM	Dominican Republic	0.95	0.95	0.95	0.95	0.95	0.95	0.95	0.95	0.95	0.95	0.95	0.95	0.95	0.95	0.95	0.95	0.95	0.95	0.95	0.95	0.95	0.95	0.95	0.95	0.95	0.95	0.95	0.95	0.95	0.95	0.95	0.95	0.95	0.95	0.95	0.95	0.95	0.95	0.95	0.95	0.95	0.95	0.95	0.9435	0.937	0.9305	0.924
51	ECU	Ecuador	0.95	0.95	0.95	0.95	0.95	0.95	0.95	0.95	0.95	0.95	0.95	0.95	0.95	0.95	0.95	0.95	0.95	0.95	0.95	0.95	0.95	0.95	0.95	0.95	0.95	0.95	0.95	0.95	0.95	0.95	0.95	0.95	0.95	0.95	0.95	0.95	0.95	0.95	0.95	0.95	0.95	0.95	0.95	0.9435	0.937	0.9305	0.924
52	SLV	El Salvador	0.95	0.95	0.95	0.95	0.95	0.95	0.95	0.95	0.95	0.95	0.95	0.95	0.95	0.95	0.95	0.95	0.95	0.95	0.95	0.95	0.95	0.95	0.95	0.95	0.95	0.95	0.95	0.95	0.95	0.95	0.95	0.95	0.95	0.95	0.95	0.95	0.95	0.95	0.95	0.95	0.95	0.95	0.95	0.9435	0.937	0.9305	0.924
53	GUF	French Guiana	0.95	0.95	0.95	0.95	0.95	0.95	0.95	0.95	0.95	0.95	0.95	0.95	0.95	0.95	0.95	0.95	0.95	0.95	0.95	0.95	0.95	0.95	0.95	0.95	0.95	0.95	0.95	0.95	0.95	0.95	0.95	0.95	0.95	0.95	0.95	0.95	0.95	0.95	0.95	0.95	0.95	0.95	0.95	0.9435	0.937	0.9305	0.924
54	GLP	Guadeloupe	0.95	0.95	0.95	0.95	0.95	0.95	0.95	0.95	0.95	0.95	0.95	0.95	0.95	0.95	0.95	0.95	0.95	0.95	0.95	0.95	0.95	0.95	0.95	0.95	0.95	0.95	0.95	0.95	0.95	0.95	0.95	0.95	0.95	0.95	0.95	0.95	0.95	0.95	0.95	0.95	0.95	0.95	0.95	0.9435	0.937	0.9305	0.924
55	GTM	Guatemala	0.95	0.95	0.95	0.95	0.95	0.95	0.95	0.95	0.95	0.95	0.95	0.95	0.95	0.95	0.95	0.95	0.95	0.95	0.95	0.95	0.95	0.95	0.95	0.95	0.95	0.95	0.95	0.95	0.95	0.95	0.95	0.95	0.95	0.95	0.95	0.95	0.95	0.95	0.95	0.95	0.95	0.95	0.95	0.9435	0.937	0.9305	0.924
56	GUY	Guyana	0.95	0.95	0.95	0.95	0.95	0.95	0.95	0.95	0.95	0.95	0.95	0.95	0.95	0.95	0.95	0.95	0.95	0.95	0.95	0.95	0.95	0.95	0.95	0.95	0.95	0.95	0.95	0.95	0.95	0.95	0.95	0.95	0.95	0.95	0.95	0.95	0.95	0.95	0.95	0.95	0.95	0.95	0.95	0.9435	0.937	0.9305	0.924
57	HTI	Haiti	0.95	0.95	0.95	0.95	0.95	0.95	0.95	0.95	0.95	0.95	0.95	0.95	0.95	0.95	0.95	0.95	0.95	0.95	0.95	0.95	0.95	0.95	0.95	0.95	0.95	0.95	0.95	0.95	0.95	0.95	0.95	0.95	0.95	0.95	0.95	0.95	0.95	0.95	0.95	0.95	0.95	0.95	0.95	0.9435	0.937	0.9305	0.924
58	HND	Honduras	0.95	0.95	0.95	0.95	0.95	0.95	0.95	0.95	0.95	0.95	0.95	0.95	0.95	0.95	0.95	0.95	0.95	0.95	0.95	0.95	0.95	0.95	0.95	0.95	0.95	0.95	0.95	0.95	0.95	0.95	0.95	0.95	0.95	0.95	0.95	0.95	0.95	0.95	0.95	0.95	0.95	0.95	0.95	0.9435	0.937	0.9305	0.924
59	JAM	Jamaica	0.95	0.95	0.95	0.95	0.95	0.95	0.95	0.95	0.95	0.95	0.95	0.95	0.95	0.95	0.95	0.95	0.95	0.95	0.95	0.95	0.95	0.95	0.95	0.95	0.95	0.95	0.95	0.95	0.95	0.95	0.95	0.95	0.95	0.95	0.95	0.95	0.95	0.95	0.95	0.95	0.95	0.95	0.95	0.9435	0.937	0.9305	0.924
60	MTQ	Martinique	0.95	0.95	0.95	0.95	0.95	0.95	0.95	0.95	0.95	0.95	0.95	0.95	0.95	0.95	0.95	0.95	0.95	0.95	0.95	0.95	0.95	0.95	0.95	0.95	0.95	0.95	0.95	0.95	0.95	0.95	0.95	0.95	0.95	0.95	0.95	0.95	0.95	0.95	0.95	0.95	0.95	0.95	0.95	0.9435	0.937	0.9305	0.924
61	NIC	Nicaragua	0.95	0.95	0.95	0.95	0.95	0.95	0.95	0.95	0.95	0.95	0.95	0.95	0.95	0.95	0.95	0.95	0.95	0.95	0.95	0.95	0.95	0.95	0.95	0.95	0.95	0.95	0.95	0.95	0.95	0.95	0.95	0.95	0.95	0.95	0.95	0.95	0.95	0.95	0.95	0.95	0.95	0.95	0.95	0.9435	0.937	0.9305	0.924
62	PAN	Panama	0.95	0.95	0.95	0.95	0.95	0.95	0.95	0.95	0.95	0.95	0.95	0.95	0.95	0.95	0.95	0.95	0.95	0.95	0.95	0.95	0.95	0.95	0.95	0.95	0.95	0.95	0.95	0.95	0.95	0.95	0.95	0.95	0.95	0.95	0.95	0.95	0.95	0.95	0.95	0.95	0.95	0.95	0.95	0.9435	0.937	0.9305	0.924
63	PRY	Paraguay	0.95	0.95	0.95	0.95	0.95	0.95	0.95	0.95	0.95	0.95	0.95	0.95	0.95	0.95	0.95	0.95	0.95	0.95	0.95	0.95	0.95	0.95	0.95	0.95	0.95	0.95	0.95	0.95	0.95	0.95	0.95	0.95	0.95	0.95	0.95	0.95	0.95	0.95	0.95	0.95	0.95	0.95	0.95	0.9435	0.937	0.9305	0.924
64	PER	Peru	0.95	0.95	0.95	0.95	0.95	0.95	0.95	0.95	0.95	0.95	0.95	0.95	0.95	0.95	0.95	0.95	0.95	0.95	0.95	0.95	0.95	0.95	0.95	0.95	0.95	0.95	0.95	0.95	0.95	0.95	0.95	0.95	0.95	0.95	0.95	0.95	0.95	0.95	0.95	0.95	0.95	0.95	0.95	0.9435	0.937	0.9305	0.924
65	SUR	Suriname	0.95	0.95	0.95	0.95	0.95	0.95	0.95	0.95	0.95	0.95	0.95	0.95	0.95	0.95	0.95	0.95	0.95	0.95	0.95	0.95	0.95	0.95	0.95	0.95	0.95	0.95	0.95	0.95	0.95	0.95	0.95	0.95	0.95	0.95	0.95	0.95	0.95	0.95	0.95	0.95	0.95	0.95	0.95	0.9435	0.937	0.9305	0.924
66	TTO	Trinidad and Tobago	0.95	0.95	0.95	0.95	0.95	0.95	0.95	0.95	0.95	0.95	0.95	0.95	0.95	0.95	0.95	0.95	0.95	0.95	0.95	0.95	0.95	0.95	0.95	0.95	0.95	0.95	0.95	0.95	0.95	0.95	0.95	0.95	0.95	0.95	0.95	0.95	0.95	0.95	0.95	0.95	0.95	0.95	0.95	0.9435	0.937	0.9305	0.924
67	URY	Uruguay	0.95	0.95	0.95	0.95	0.95	0.95	0.95	0.95	0.95	0.95	0.95	0.95	0.95	0.95	0.95	0.95	0.95	0.95	0.95	0.95	0.95	0.95	0.95	0.95	0.95	0.95	0.95	0.95	0.95	0.95	0.95	0.95	0.95	0.95	0.95	0.95	0.95	0.95	0.95	0.95	0.95	0.95	0.95	0.9435	0.937	0.9305	0.924
68	VEN	Venezuela	0.95	0.95	0.95	0.95	0.95	0.95	0.95	0.95	0.95	0.95	0.95	0.95	0.95	0.95	0.95	0.95	0.95	0.95	0.95	0.95	0.95	0.95	0.95	0.95	0.95	0.95	0.95	0.95	0.95	0.95	0.95	0.95	0.95	0.95	0.95	0.95	0.95	0.95	0.95	0.95	0.95	0.95	0.95	0.9435	0.937	0.9305	0.924
69	ALB	Albania	0.95	0.95	0.95	0.95	0.95	0.95	0.95	0.95	0.95	0.95	0.95	0.95	0.95	0.95	0.95	0.95	0.95	0.95	0.95	0.95	0.95	0.95	0.95	0.95	0.95	0.95	0.95	0.95	0.95	0.95	0.95	0.95	0.95	0.95	0.95	0.95	0.95	0.95	0.95	0.95	0.95	0.95	0.95	0.942	0.934	0.926	0.918
70	BIH	Bosnia and Herzegovina	0.95	0.95	0.95	0.95	0.95	0.95	0.95	0.95	0.95	0.95	0.95	0.95	0.95	0.95	0.95	0.95	0.95	0.95	0.95	0.95	0.95	0.95	0.95	0.95	0.95	0.95	0.95	0.95	0.95	0.95	0.95	0.95	0.95	0.95	0.95	0.95	0.95	0.95	0.95	0.95	0.95	0.95	0.95	0.942	0.934	0.926	0.918
71	ISL	Iceland	0.95	0.95	0.95	0.95	0.95	0.95	0.95	0.95	0.95	0.95	0.95	0.95	0.95	0.95	0.95	0.95	0.95	0.95	0.95	0.95	0.95	0.95	0.95	0.95	0.95	0.95	0.95	0.95	0.95	0.95	0.95	0.95	0.95	0.95	0.95	0.95	0.95	0.95	0.95	0.95	0.95	0.95	0.95	0.942	0.934	0.926	0.918
72	MKD	North Macedonia	0.95	0.95	0.95	0.95	0.95	0.95	0.95	0.95	0.95	0.95	0.95	0.95	0.95	0.95	0.95	0.95	0.95	0.95	0.95	0.95	0.95	0.95	0.95	0.95	0.95	0.95	0.95	0.95	0.95	0.95	0.95	0.95	0.95	0.95	0.95	0.95	0.95	0.95	0.95	0.95	0.95	0.95	0.95	0.942	0.934	0.926	0.918
73	SRB	Serbia	0.95	0.95	0.95	0.95	0.95	0.95	0.95	0.95	0.95	0.95	0.95	0.95	0.95	0.95	0.95	0.95	0.95	0.95	0.95	0.95	0.95	0.95	0.95	0.95	0.95	0.95	0.95	0.95	0.95	0.95	0.95	0.95	0.95	0.95	0.95	0.95	0.95	0.95	0.95	0.95	0.95	0.95	0.95	0.942	0.934	0.926	0.918
74	RUS	Russia	0.95	0.95	0.95	0.95	0.95	0.95	0.95	0.95	0.95	0.95	0.95	0.95	0.95	0.95	0.95	0.95	0.95	0.95	0.95	0.95	0.95	0.95	0.95	0.95	0.95	0.95	0.95	0.95	0.95	0.95	0.95	0.95	0.95	0.95	0.95	0.95	0.95	0.95	0.95	0.95	0.95	0.95	0.95	0.942	0.934	0.926	0.918
75	UKR	Ukraine	0.95	0.95	0.95	0.95	0.95	0.95	0.95	0.95	0.95	0.95	0.95	0.95	0.95	0.95	0.95	0.95	0.95	0.95	0.95	0.95	0.95	0.95	0.95	0.95	0.95	0.95	0.95	0.95	0.95	0.95	0.95	0.95	0.95	0.95	0.95	0.95	0.95	0.95	0.95	0.95	0.95	0.95	0.95	0.942	0.934	0.926	0.918
76	BLR	Belarus	0.95	0.95	0.95	0.95	0.95	0.95	0.95	0.95	0.95	0.95	0.95	0.95	0.95	0.95	0.95	0.95	0.95	0.95	0.95	0.95	0.95	0.95	0.95	0.95	0.95	0.95	0.95	0.95	0.95	0.95	0.95	0.95	0.95	0.95	0.95	0.95	0.95	0.95	0.95	0.95	0.95	0.95	0.95	0.942	0.934	0.926	0.918
77	EST	Estonia	0.95	0.95	0.95	0.95	0.95	0.95	0.95	0.95	0.95	0.95	0.95	0.95	0.95	0.95	0.95	0.95	0.95	0.95	0.95	0.95	0.95	0.95	0.95	0.95	0.95	0.95	0.95	0.95	0.95	0.95	0.95	0.95	0.95	0.95	0.95	0.95	0.95	0.95	0.95	0.95	0.95	0.95	0.95	0.942	0.934	0.926	0.918
78	LVA	Latvia	0.95	0.95	0.95	0.95	0.95	0.95	0.95	0.95	0.95	0.95	0.95	0.95	0.95	0.95	0.95	0.95	0.95	0.95	0.95	0.95	0.95	0.95	0.95	0.95	0.95	0.95	0.95	0.95	0.95	0.95	0.95	0.95	0.95	0.95	0.95	0.95	0.95	0.95	0.95	0.95	0.95	0.95	0.95	0.942	0.934	0.926	0.918
79	LTU	Lithuania	0.95	0.95	0.95	0.95	0.95	0.95	0.95	0.95	0.95	0.95	0.95	0.95	0.95	0.95	0.95	0.95	0.95	0.95	0.95	0.95	0.95	0.95	0.95	0.95	0.95	0.95	0.95	0.95	0.95	0.95	0.95	0.95	0.95	0.95	0.95	0.95	0.95	0.95	0.95	0.95	0.95	0.95	0.95	0.942	0.934	0.926	0.918
80	GEO	Georgia	0.95	0.95	0.95	0.95	0.95	0.95	0.95	0.95	0.95	0.95	0.95	0.95	0.95	0.95	0.95	0.95	0.95	0.95	0.95	0.95	0.95	0.95	0.95	0.95	0.95	0.95	0.95	0.95	0.95	0.95	0.95	0.95	0.95	0.95	0.95	0.95	0.95	0.95	0.95	0.95	0.95	0.95	0.95	0.942	0.934	0.926	0.918
81	AZE	Azerbaijan	0.95	0.95	0.95	0.95	0.95	0.95	0.95	0.95	0.95	0.95	0.95	0.95	0.95	0.95	0.95	0.95	0.95	0.95	0.95	0.95	0.95	0.95	0.95	0.95	0.95	0.95	0.95	0.95	0.95	0.95	0.95	0.95	0.95	0.95	0.95	0.95	0.95	0.95	0.95	0.95	0.95	0.95	0.95	0.942	0.934	0.926	0.918
82	ARM	Armenia	0.95	0.95	0.95	0.95	0.95	0.95	0.95	0.95	0.95	0.95	0.95	0.95	0.95	0.95	0.95	0.95	0.95	0.95	0.95	0.95	0.95	0.95	0.95	0.95	0.95	0.95	0.95	0.95	0.95	0.95	0.95	0.95	0.95	0.95	0.95	0.95	0.95	0.95	0.95	0.95	0.95	0.95	0.95	0.942	0.934	0.926	0.918
83	KAZ	Kazakhstan	0.95	0.95	0.95	0.95	0.95	0.95	0.95	0.95	0.95	0.95	0.95	0.95	0.95	0.95	0.95	0.95	0.95	0.95	0.95	0.95	0.95	0.95	0.95	0.95	0.95	0.95	0.95	0.95	0.95	0.95	0.95	0.95	0.95	0.95	0.95	0.95	0.95	0.95	0.95	0.95	0.95	0.95	0.95	0.942	0.934	0.926	0.918
84	KGZ	Kyrgyzstan	0.95	0.95	0.95	0.95	0.95	0.95	0.95	0.95	0.95	0.95	0.95	0.95	0.95	0.95	0.95	0.95	0.95	0.95	0.95	0.95	0.95	0.95	0.95	0.95	0.95	0.95	0.95	0.95	0.95	0.95	0.95	0.95	0.95	0.95	0.95	0.95	0.95	0.95	0.95	0.95	0.95	0.95	0.95	0.942	0.934	0.926	0.918
85	TJK	Tajikistan	0.95	0.95	0.95	0.95	0.95	0.95	0.95	0.95	0.95	0.95	0.95	0.95	0.95	0.95	0.95	0.95	0.95	0.95	0.95	0.95	0.95	0.95	0.95	0.95	0.95	0.95	0.95	0.95	0.95	0.95	0.95	0.95	0.95	0.95	0.95	0.95	0.95	0.95	0.95	0.95	0.95	0.95	0.95	0.942	0.934	0.926	0.918
86	UZB	Uzbekistan	0.95	0.95	0.95	0.95	0.95	0.95	0.95	0.95	0.95	0.95	0.95	0.95	0.95	0.95	0.95	0.95	0.95	0.95	0.95	0.95	0.95	0.95	0.95	0.95	0.95	0.95	0.95	0.95	0.95	0.95	0.95	0.95	0.95	0.95	0.95	0.95	0.95	0.95	0.95	0.95	0.95	0.95	0.95	0.942	0.934	0.926	0.918
87	TKM	Turkmenistan	0.95	0.95	0.95	0.95	0.95	0.95	0.95	0.95	0.95	0.95	0.95	0.95	0.95	0.95	0.95	0.95	0.95	0.95	0.95	0.95	0.95	0.95	0.95	0.95	0.95	0.95	0.95	0.95	0.95	0.95	0.95	0.95	0.95	0.95	0.95	0.95	0.95	0.95	0.95	0.95	0.95	0.95	0.95	0.942	0.934	0.926	0.918
88	MDA	Moldova	0.95	0.95	0.95	0.95	0.95	0.95	0.95	0.95	0.95	0.95	0.95	0.95	0.95	0.95	0.95	0.95	0.95	0.95	0.95	0.95	0.95	0.95	0.95	0.95	0.95	0.95	0.95	0.95	0.95	0.95	0.95	0.95	0.95	0.95	0.95	0.95	0.95	0.95	0.95	0.95	0.95	0.95	0.95	0.942	0.934	0.926	0.918
89	DZA	Algeria	0.95	0.95	0.95	0.95	0.95	0.95	0.95	0.95	0.95	0.95	0.95	0.95	0.95	0.95	0.95	0.95	0.95	0.95	0.95	0.95	0.95	0.95	0.95	0.95	0.95	0.95	0.95	0.95	0.95	0.95	0.95	0.95	0.95	0.95	0.95	0.95	0.95	0.95	0.95	0.95	0.95	0.95	0.95	0.947	0.944	0.941	0.938
90	AGO	Angola	0.95	0.95	0.95	0.95	0.95	0.95	0.95	0.95	0.95	0.95	0.95	0.95	0.95	0.95	0.95	0.95	0.95	0.95	0.95	0.95	0.95	0.95	0.95	0.95	0.95	0.95	0.95	0.95	0.95	0.95	0.95	0.95	0.95	0.95	0.95	0.95	0.95	0.95	0.95	0.95	0.95	0.95	0.95	0.947	0.944	0.941	0.938
91	BEN	Benin	0.95	0.95	0.95	0.95	0.95	0.95	0.95	0.95	0.95	0.95	0.95	0.95	0.95	0.95	0.95	0.95	0.95	0.95	0.95	0.95	0.95	0.95	0.95	0.95	0.95	0.95	0.95	0.95	0.95	0.95	0.95	0.95	0.95	0.95	0.95	0.95	0.95	0.95	0.95	0.95	0.95	0.95	0.95	0.947	0.944	0.941	0.938
92	BWA	Botswana	0.95	0.95	0.95	0.95	0.95	0.95	0.95	0.95	0.95	0.95	0.95	0.95	0.95	0.95	0.95	0.95	0.95	0.95	0.95	0.95	0.95	0.95	0.95	0.95	0.95	0.95	0.95	0.95	0.95	0.95	0.95	0.95	0.95	0.95	0.95	0.95	0.95	0.95	0.95	0.95	0.95	0.95	0.95	0.947	0.944	0.941	0.938
93	BFA	Burkina Faso	0.95	0.95	0.95	0.95	0.95	0.95	0.95	0.95	0.95	0.95	0.95	0.95	0.95	0.95	0.95	0.95	0.95	0.95	0.95	0.95	0.95	0.95	0.95	0.95	0.95	0.95	0.95	0.95	0.95	0.95	0.95	0.95	0.95	0.95	0.95	0.95	0.95	0.95	0.95	0.95	0.95	0.95	0.95	0.947	0.944	0.941	0.938
94	BDI	Burundi	0.95	0.95	0.95	0.95	0.95	0.95	0.95	0.95	0.95	0.95	0.95	0.95	0.95	0.95	0.95	0.95	0.95	0.95	0.95	0.95	0.95	0.95	0.95	0.95	0.95	0.95	0.95	0.95	0.95	0.95	0.95	0.95	0.95	0.95	0.95	0.95	0.95	0.95	0.95	0.95	0.95	0.95	0.95	0.947	0.944	0.941	0.938
95	CMR	Cameroon	0.95	0.95	0.95	0.95	0.95	0.95	0.95	0.95	0.95	0.95	0.95	0.95	0.95	0.95	0.95	0.95	0.95	0.95	0.95	0.95	0.95	0.95	0.95	0.95	0.95	0.95	0.95	0.95	0.95	0.95	0.95	0.95	0.95	0.95	0.95	0.95	0.95	0.95	0.95	0.95	0.95	0.95	0.95	0.947	0.944	0.941	0.938
96	TCD	Chad	0.95	0.95	0.95	0.95	0.95	0.95	0.95	0.95	0.95	0.95	0.95	0.95	0.95	0.95	0.95	0.95	0.95	0.95	0.95	0.95	0.95	0.95	0.95	0.95	0.95	0.95	0.95	0.95	0.95	0.95	0.95	0.95	0.95	0.95	0.95	0.95	0.95	0.95	0.95	0.95	0.95	0.95	0.95	0.947	0.944	0.941	0.938
97	COG	Congo (Brazzaville)	0.95	0.95	0.95	0.95	0.95	0.95	0.95	0.95	0.95	0.95	0.95	0.95	0.95	0.95	0.95	0.95	0.95	0.95	0.95	0.95	0.95	0.95	0.95	0.95	0.95	0.95	0.95	0.95	0.95	0.95	0.95	0.95	0.95	0.95	0.95	0.95	0.95	0.95	0.95	0.95	0.95	0.95	0.95	0.947	0.944	0.941	0.938
98	COD	Congo (Kinshasa)	0.95	0.95	0.95	0.95	0.95	0.95	0.95	0.95	0.95	0.95	0.95	0.95	0.95	0.95	0.95	0.95	0.95	0.95	0.95	0.95	0.95	0.95	0.95	0.95	0.95	0.95	0.95	0.95	0.95	0.95	0.95	0.95	0.95	0.95	0.95	0.95	0.95	0.95	0.95	0.95	0.95	0.95	0.95	0.947	0.944	0.941	0.938
99	CIV	Côte d'Ivoire	0.95	0.95	0.95	0.95	0.95	0.95	0.95	0.95	0.95	0.95	0.95	0.95	0.95	0.95	0.95	0.95	0.95	0.95	0.95	0.95	0.95	0.95	0.95	0.95	0.95	0.95	0.95	0.95	0.95	0.95	0.95	0.95	0.95	0.95	0.95	0.95	0.95	0.95	0.95	0.95	0.95	0.95	0.95	0.947	0.944	0.941	0.938
100	DJI	Djibouti	0.95	0.95	0.95	0.95	0.95	0.95	0.95	0.95	0.95	0.95	0.95	0.95	0.95	0.95	0.95	0.95	0.95	0.95	0.95	0.95	0.95	0.95	0.95	0.95	0.95	0.95	0.95	0.95	0.95	0.95	0.95	0.95	0.95	0.95	0.95	0.95	0.95	0.95	0.95	0.95	0.95	0.95	0.95	0.947	0.944	0.941	0.938
101	ERI	Eritrea	0.95	0.95	0.95	0.95	0.95	0.95	0.95	0.95	0.95	0.95	0.95	0.95	0.95	0.95	0.95	0.95	0.95	0.95	0.95	0.95	0.95	0.95	0.95	0.95	0.95	0.95	0.95	0.95	0.95	0.95	0.95	0.95	0.95	0.95	0.95	0.95	0.95	0.95	0.95	0.95	0.95	0.95	0.95	0.947	0.944	0.941	0.938
102	ETH	Ethiopia	0.95	0.95	0.95	0.95	0.95	0.95	0.95	0.95	0.95	0.95	0.95	0.95	0.95	0.95	0.95	0.95	0.95	0.95	0.95	0.95	0.95	0.95	0.95	0.95	0.95	0.95	0.95	0.95	0.95	0.95	0.95	0.95	0.95	0.95	0.95	0.95	0.95	0.95	0.95	0.95	0.95	0.95	0.95	0.947	0.944	0.941	0.938
103	GAB	Gabon	0.95	0.95	0.95	0.95	0.95	0.95	0.95	0.95	0.95	0.95	0.95	0.95	0.95	0.95	0.95	0.95	0.95	0.95	0.95	0.95	0.95	0.95	0.95	0.95	0.95	0.95	0.95	0.95	0.95	0.95	0.95	0.95	0.95	0.95	0.95	0.95	0.95	0.95	0.95	0.95	0.95	0.95	0.95	0.947	0.944	0.941	0.938
104	GHA	Ghana	0.95	0.95	0.95	0.95	0.95	0.95	0.95	0.95	0.95	0.95	0.95	0.95	0.95	0.95	0.95	0.95	0.95	0.95	0.95	0.95	0.95	0.95	0.95	0.95	0.95	0.95	0.95	0.95	0.95	0.95	0.95	0.95	0.95	0.95	0.95	0.95	0.95	0.95	0.95	0.95	0.95	0.95	0.95	0.947	0.944	0.941	0.938
105	GIN	Guinea	0.95	0.95	0.95	0.95	0.95	0.95	0.95	0.95	0.95	0.95	0.95	0.95	0.95	0.95	0.95	0.95	0.95	0.95	0.95	0.95	0.95	0.95	0.95	0.95	0.95	0.95	0.95	0.95	0.95	0.95	0.95	0.95	0.95	0.95	0.95	0.95	0.95	0.95	0.95	0.95	0.95	0.95	0.95	0.947	0.944	0.941	0.938
106	KEN	Kenya	0.95	0.95	0.95	0.95	0.95	0.95	0.95	0.95	0.95	0.95	0.95	0.95	0.95	0.95	0.95	0.95	0.95	0.95	0.95	0.95	0.95	0.95	0.95	0.95	0.95	0.95	0.95	0.95	0.95	0.95	0.95	0.95	0.95	0.95	0.95	0.95	0.95	0.95	0.95	0.95	0.95	0.95	0.95	0.947	0.944	0.941	0.938
107	LBR	Liberia	0.95	0.95	0.95	0.95	0.95	0.95	0.95	0.95	0.95	0.95	0.95	0.95	0.95	0.95	0.95	0.95	0.95	0.95	0.95	0.95	0.95	0.95	0.95	0.95	0.95	0.95	0.95	0.95	0.95	0.95	0.95	0.95	0.95	0.95	0.95	0.95	0.95	0.95	0.95	0.95	0.95	0.95	0.95	0.947	0.944	0.941	0.938
108	LBY	Libya	0.95	0.95	0.95	0.95	0.95	0.95	0.95	0.95	0.95	0.95	0.95	0.95	0.95	0.95	0.95	0.95	0.95	0.95	0.95	0.95	0.95	0.95	0.95	0.95	0.95	0.95	0.95	0.95	0.95	0.95	0.95	0.95	0.95	0.95	0.95	0.95	0.95	0.95	0.95	0.95	0.95	0.95	0.95	0.947	0.944	0.941	0.938
109	MDG	Madagascar	0.95	0.95	0.95	0.95	0.95	0.95	0.95	0.95	0.95	0.95	0.95	0.95	0.95	0.95	0.95	0.95	0.95	0.95	0.95	0.95	0.95	0.95	0.95	0.95	0.95	0.95	0.95	0.95	0.95	0.95	0.95	0.95	0.95	0.95	0.95	0.95	0.95	0.95	0.95	0.95	0.95	0.95	0.95	0.947	0.944	0.941	0.938
110	MWI	Malawi	0.95	0.95	0.95	0.95	0.95	0.95	0.95	0.95	0.95	0.95	0.95	0.95	0.95	0.95	0.95	0.95	0.95	0.95	0.95	0.95	0.95	0.95	0.95	0.95	0.95	0.95	0.95	0.95	0.95	0.95	0.95	0.95	0.95	0.95	0.95	0.95	0.95	0.95	0.95	0.95	0.95	0.95	0.95	0.947	0.944	0.941	0.938
111	MLI	Mali	0.95	0.95	0.95	0.95	0.95	0.95	0.95	0.95	0.95	0.95	0.95	0.95	0.95	0.95	0.95	0.95	0.95	0.95	0.95	0.95	0.95	0.95	0.95	0.95	0.95	0.95	0.95	0.95	0.95	0.95	0.95	0.95	0.95	0.95	0.95	0.95	0.95	0.95	0.95	0.95	0.95	0.95	0.95	0.947	0.944	0.941	0.938
112	MRT	Mauritania	0.95	0.95	0.95	0.95	0.95	0.95	0.95	0.95	0.95	0.95	0.95	0.95	0.95	0.95	0.95	0.95	0.95	0.95	0.95	0.95	0.95	0.95	0.95	0.95	0.95	0.95	0.95	0.95	0.95	0.95	0.95	0.95	0.95	0.95	0.95	0.95	0.95	0.95	0.95	0.95	0.95	0.95	0.95	0.947	0.944	0.941	0.938
113	MAR	Morocco	0.95	0.95	0.95	0.95	0.95	0.95	0.95	0.95	0.95	0.95	0.95	0.95	0.95	0.95	0.95	0.95	0.95	0.95	0.95	0.95	0.95	0.95	0.95	0.95	0.95	0.95	0.95	0.95	0.95	0.95	0.95	0.95	0.95	0.95	0.95	0.95	0.95	0.95	0.95	0.95	0.95	0.95	0.95	0.947	0.944	0.941	0.938
114	MOZ	Mozambique	0.95	0.95	0.95	0.95	0.95	0.95	0.95	0.95	0.95	0.95	0.95	0.95	0.95	0.95	0.95	0.95	0.95	0.95	0.95	0.95	0.95	0.95	0.95	0.95	0.95	0.95	0.95	0.95	0.95	0.95	0.95	0.95	0.95	0.95	0.95	0.95	0.95	0.95	0.95	0.95	0.95	0.95	0.95	0.947	0.944	0.941	0.938
115	NAM	Namibia	0.95	0.95	0.95	0.95	0.95	0.95	0.95	0.95	0.95	0.95	0.95	0.95	0.95	0.95	0.95	0.95	0.95	0.95	0.95	0.95	0.95	0.95	0.95	0.95	0.95	0.95	0.95	0.95	0.95	0.95	0.95	0.95	0.95	0.95	0.95	0.95	0.95	0.95	0.95	0.95	0.95	0.95	0.95	0.947	0.944	0.941	0.938
116	NER	Niger	0.95	0.95	0.95	0.95	0.95	0.95	0.95	0.95	0.95	0.95	0.95	0.95	0.95	0.95	0.95	0.95	0.95	0.95	0.95	0.95	0.95	0.95	0.95	0.95	0.95	0.95	0.95	0.95	0.95	0.95	0.95	0.95	0.95	0.95	0.95	0.95	0.95	0.95	0.95	0.95	0.95	0.95	0.95	0.947	0.944	0.941	0.938
117	NGA	Nigeria	0.95	0.95	0.95	0.95	0.95	0.95	0.95	0.95	0.95	0.95	0.95	0.95	0.95	0.95	0.95	0.95	0.95	0.95	0.95	0.95	0.95	0.95	0.95	0.95	0.95	0.95	0.95	0.95	0.95	0.95	0.95	0.95	0.95	0.95	0.95	0.95	0.95	0.95	0.95	0.95	0.95	0.95	0.95	0.947	0.944	0.941	0.938
118	REU	Reunion	0.95	0.95	0.95	0.95	0.95	0.95	0.95	0.95	0.95	0.95	0.95	0.95	0.95	0.95	0.95	0.95	0.95	0.95	0.95	0.95	0.95	0.95	0.95	0.95	0.95	0.95	0.95	0.95	0.95	0.95	0.95	0.95	0.95	0.95	0.95	0.95	0.95	0.95	0.95	0.95	0.95	0.95	0.95	0.947	0.944	0.941	0.938
119	RWA	Rwanda	0.95	0.95	0.95	0.95	0.95	0.95	0.95	0.95	0.95	0.95	0.95	0.95	0.95	0.95	0.95	0.95	0.95	0.95	0.95	0.95	0.95	0.95	0.95	0.95	0.95	0.95	0.95	0.95	0.95	0.95	0.95	0.95	0.95	0.95	0.95	0.95	0.95	0.95	0.95	0.95	0.95	0.95	0.95	0.947	0.944	0.941	0.938
120	SEN	Senegal	0.95	0.95	0.95	0.95	0.95	0.95	0.95	0.95	0.95	0.95	0.95	0.95	0.95	0.95	0.95	0.95	0.95	0.95	0.95	0.95	0.95	0.95	0.95	0.95	0.95	0.95	0.95	0.95	0.95	0.95	0.95	0.95	0.95	0.95	0.95	0.95	0.95	0.95	0.95	0.95	0.95	0.95	0.95	0.947	0.944	0.941	0.938
121	SLE	Sierra Leone	0.95	0.95	0.95	0.95	0.95	0.95	0.95	0.95	0.95	0.95	0.95	0.95	0.95	0.95	0.95	0.95	0.95	0.95	0.95	0.95	0.95	0.95	0.95	0.95	0.95	0.95	0.95	0.95	0.95	0.95	0.95	0.95	0.95	0.95	0.95	0.95	0.95	0.95	0.95	0.95	0.95	0.95	0.95	0.947	0.944	0.941	0.938
122	SDN	Sudan	0.95	0.95	0.95	0.95	0.95	0.95	0.95	0.95	0.95	0.95	0.95	0.95	0.95	0.95	0.95	0.95	0.95	0.95	0.95	0.95	0.95	0.95	0.95	0.95	0.95	0.95	0.95	0.95	0.95	0.95	0.95	0.95	0.95	0.95	0.95	0.95	0.95	0.95	0.95	0.95	0.95	0.95	0.95	0.947	0.944	0.941	0.938
123	TZA	Tanzania	0.95	0.95	0.95	0.95	0.95	0.95	0.95	0.95	0.95	0.95	0.95	0.95	0.95	0.95	0.95	0.95	0.95	0.95	0.95	0.95	0.95	0.95	0.95	0.95	0.95	0.95	0.95	0.95	0.95	0.95	0.95	0.95	0.95	0.95	0.95	0.95	0.95	0.95	0.95	0.95	0.95	0.95	0.95	0.947	0.944	0.941	0.938
124	TGO	Togo	0.95	0.95	0.95	0.95	0.95	0.95	0.95	0.95	0.95	0.95	0.95	0.95	0.95	0.95	0.95	0.95	0.95	0.95	0.95	0.95	0.95	0.95	0.95	0.95	0.95	0.95	0.95	0.95	0.95	0.95	0.95	0.95	0.95	0.95	0.95	0.95	0.95	0.95	0.95	0.95	0.95	0.95	0.95	0.947	0.944	0.941	0.938
125	TUN	Tunisia	0.95	0.95	0.95	0.95	0.95	0.95	0.95	0.95	0.95	0.95	0.95	0.95	0.95	0.95	0.95	0.95	0.95	0.95	0.95	0.95	0.95	0.95	0.95	0.95	0.95	0.95	0.95	0.95	0.95	0.95	0.95	0.95	0.95	0.95	0.95	0.95	0.95	0.95	0.95	0.95	0.95	0.95	0.95	0.947	0.944	0.941	0.938
126	UGA	Uganda	0.95	0.95	0.95	0.95	0.95	0.95	0.95	0.95	0.95	0.95	0.95	0.95	0.95	0.95	0.95	0.95	0.95	0.95	0.95	0.95	0.95	0.95	0.95	0.95	0.95	0.95	0.95	0.95	0.95	0.95	0.95	0.95	0.95	0.95	0.95	0.95	0.95	0.95	0.95	0.95	0.95	0.95	0.95	0.947	0.944	0.941	0.938
127	ZMB	Zambia	0.95	0.95	0.95	0.95	0.95	0.95	0.95	0.95	0.95	0.95	0.95	0.95	0.95	0.95	0.95	0.95	0.95	0.95	0.95	0.95	0.95	0.95	0.95	0.95	0.95	0.95	0.95	0.95	0.95	0.95	0.95	0.95	0.95	0.95	0.95	0.95	0.95	0.95	0.95	0.95	0.95	0.95	0.95	0.947	0.944	0.941	0.938
128	ZWE	Zimbabwe	0.95	0.95	0.95	0.95	0.95	0.95	0.95	0.95	0.95	0.95	0.95	0.95	0.95	0.95	0.95	0.95	0.95	0.95	0.95	0.95	0.95	0.95	0.95	0.95	0.95	0.95	0.95	0.95	0.95	0.95	0.95	0.95	0.95	0.95	0.95	0.95	0.95	0.95	0.95	0.95	0.95	0.95	0.95	0.947	0.944	0.941	0.938
129	AFG	Afghanistan	0.95	0.95	0.95	0.95	0.95	0.95	0.95	0.95	0.95	0.95	0.95	0.95	0.95	0.95	0.95	0.95	0.95	0.95	0.95	0.95	0.95	0.95	0.95	0.95	0.95	0.95	0.95	0.95	0.95	0.95	0.95	0.95	0.95	0.95	0.95	0.95	0.95	0.95	0.95	0.95	0.95	0.95	0.95	0.948	0.946	0.944	0.942
130	BHR	Bahrain	0.95	0.95	0.95	0.95	0.95	0.95	0.95	0.95	0.95	0.95	0.95	0.95	0.95	0.95	0.95	0.95	0.95	0.95	0.95	0.95	0.95	0.95	0.95	0.95	0.95	0.95	0.95	0.95	0.95	0.95	0.95	0.95	0.95	0.95	0.95	0.95	0.95	0.95	0.95	0.95	0.95	0.95	0.95	0.948	0.946	0.944	0.942
131	IRQ	Iraq	0.95	0.95	0.95	0.95	0.95	0.95	0.95	0.95	0.95	0.95	0.95	0.95	0.95	0.95	0.95	0.95	0.95	0.95	0.95	0.95	0.95	0.95	0.95	0.95	0.95	0.95	0.95	0.95	0.95	0.95	0.95	0.95	0.95	0.95	0.95	0.95	0.95	0.95	0.95	0.95	0.95	0.95	0.95	0.948	0.946	0.944	0.942
132	ISR	Israel	0.95	0.95	0.95	0.95	0.95	0.95	0.95	0.95	0.95	0.95	0.95	0.95	0.95	0.95	0.95	0.95	0.95	0.95	0.95	0.95	0.95	0.95	0.95	0.95	0.95	0.95	0.95	0.95	0.95	0.95	0.95	0.95	0.95	0.95	0.95	0.95	0.95	0.95	0.95	0.95	0.95	0.95	0.95	0.948	0.946	0.944	0.942
133	JOR	Jordan	0.95	0.95	0.95	0.95	0.95	0.95	0.95	0.95	0.95	0.95	0.95	0.95	0.95	0.95	0.95	0.95	0.95	0.95	0.95	0.95	0.95	0.95	0.95	0.95	0.95	0.95	0.95	0.95	0.95	0.95	0.95	0.95	0.95	0.95	0.95	0.95	0.95	0.95	0.95	0.95	0.95	0.95	0.95	0.948	0.946	0.944	0.942
134	XKX	Kosovo	0.95	0.95	0.95	0.95	0.95	0.95	0.95	0.95	0.95	0.95	0.95	0.95	0.95	0.95	0.95	0.95	0.95	0.95	0.95	0.95	0.95	0.95	0.95	0.95	0.95	0.95	0.95	0.95	0.95	0.95	0.95	0.95	0.95	0.95	0.95	0.95	0.95	0.95	0.95	0.95	0.95	0.95	0.95	0.948	0.946	0.944	0.942
135	KWT	Kuwait	0.95	0.95	0.95	0.95	0.95	0.95	0.95	0.95	0.95	0.95	0.95	0.95	0.95	0.95	0.95	0.95	0.95	0.95	0.95	0.95	0.95	0.95	0.95	0.95	0.95	0.95	0.95	0.95	0.95	0.95	0.95	0.95	0.95	0.95	0.95	0.95	0.95	0.95	0.95	0.95	0.95	0.95	0.95	0.948	0.946	0.944	0.942
136	LBN	Lebanon	0.95	0.95	0.95	0.95	0.95	0.95	0.95	0.95	0.95	0.95	0.95	0.95	0.95	0.95	0.95	0.95	0.95	0.95	0.95	0.95	0.95	0.95	0.95	0.95	0.95	0.95	0.95	0.95	0.95	0.95	0.95	0.95	0.95	0.95	0.95	0.95	0.95	0.95	0.95	0.95	0.95	0.95	0.95	0.948	0.946	0.944	0.942
137	OMN	Oman	0.95	0.95	0.95	0.95	0.95	0.95	0.95	0.95	0.95	0.95	0.95	0.95	0.95	0.95	0.95	0.95	0.95	0.95	0.95	0.95	0.95	0.95	0.95	0.95	0.95	0.95	0.95	0.95	0.95	0.95	0.95	0.95	0.95	0.95	0.95	0.95	0.95	0.95	0.95	0.95	0.95	0.95	0.95	0.948	0.946	0.944	0.942
138	PSE	Palestine	0.95	0.95	0.95	0.95	0.95	0.95	0.95	0.95	0.95	0.95	0.95	0.95	0.95	0.95	0.95	0.95	0.95	0.95	0.95	0.95	0.95	0.95	0.95	0.95	0.95	0.95	0.95	0.95	0.95	0.95	0.95	0.95	0.95	0.95	0.95	0.95	0.95	0.95	0.95	0.95	0.95	0.95	0.95	0.948	0.946	0.944	0.942
139	QAT	Qatar	0.95	0.95	0.95	0.95	0.95	0.95	0.95	0.95	0.95	0.95	0.95	0.95	0.95	0.95	0.95	0.95	0.95	0.95	0.95	0.95	0.95	0.95	0.95	0.95	0.95	0.95	0.95	0.95	0.95	0.95	0.95	0.95	0.95	0.95	0.95	0.95	0.95	0.95	0.95	0.95	0.95	0.95	0.95	0.948	0.946	0.944	0.942
140	SYR	Syria	0.95	0.95	0.95	0.95	0.95	0.95	0.95	0.95	0.95	0.95	0.95	0.95	0.95	0.95	0.95	0.95	0.95	0.95	0.95	0.95	0.95	0.95	0.95	0.95	0.95	0.95	0.95	0.95	0.95	0.95	0.95	0.95	0.95	0.95	0.95	0.95	0.95	0.95	0.95	0.95	0.95	0.95	0.95	0.948	0.946	0.944	0.942
141	ARE	United Arab Emiratese	0.95	0.95	0.95	0.95	0.95	0.95	0.95	0.95	0.95	0.95	0.95	0.95	0.95	0.95	0.95	0.95	0.95	0.95	0.95	0.95	0.95	0.95	0.95	0.95	0.95	0.95	0.95	0.95	0.95	0.95	0.95	0.95	0.95	0.95	0.95	0.95	0.95	0.95	0.95	0.95	0.95	0.95	0.95	0.948	0.946	0.944	0.942
142	YEM	Yemen	0.95	0.95	0.95	0.95	0.95	0.95	0.95	0.95	0.95	0.95	0.95	0.95	0.95	0.95	0.95	0.95	0.95	0.95	0.95	0.95	0.95	0.95	0.95	0.95	0.95	0.95	0.95	0.95	0.95	0.95	0.95	0.95	0.95	0.95	0.95	0.95	0.95	0.95	0.95	0.95	0.95	0.95	0.95	0.948	0.946	0.944	0.942
143	BGD	Bangladesh	0.95	0.95	0.95	0.95	0.95	0.95	0.95	0.95	0.95	0.95	0.95	0.95	0.95	0.95	0.95	0.95	0.95	0.95	0.95	0.95	0.95	0.95	0.95	0.95	0.95	0.95	0.95	0.95	0.95	0.95	0.95	0.95	0.95	0.95	0.95	0.95	0.95	0.95	0.95	0.95	0.95	0.95	0.95	0.945823	0.941646	0.937469	0.933293
144	BTN	Bhutan	0.95	0.95	0.95	0.95	0.95	0.95	0.95	0.95	0.95	0.95	0.95	0.95	0.95	0.95	0.95	0.95	0.95	0.95	0.95	0.95	0.95	0.95	0.95	0.95	0.95	0.95	0.95	0.95	0.95	0.95	0.95	0.95	0.95	0.95	0.95	0.95	0.95	0.95	0.95	0.95	0.95	0.95	0.95	0.945823	0.941646	0.937469	0.933293
145	MMR	Burma	0.95	0.95	0.95	0.95	0.95	0.95	0.95	0.95	0.95	0.95	0.95	0.95	0.95	0.95	0.95	0.95	0.95	0.95	0.95	0.95	0.95	0.95	0.95	0.95	0.95	0.95	0.95	0.95	0.95	0.95	0.95	0.95	0.95	0.95	0.95	0.95	0.95	0.95	0.95	0.95	0.95	0.95	0.95	0.945823	0.941646	0.937469	0.933293
146	NPL	Nepal	0.95	0.95	0.95	0.95	0.95	0.95	0.95	0.95	0.95	0.95	0.95	0.95	0.95	0.95	0.95	0.95	0.95	0.95	0.95	0.95	0.95	0.95	0.95	0.95	0.95	0.95	0.95	0.95	0.95	0.95	0.95	0.95	0.95	0.95	0.95	0.95	0.95	0.95	0.95	0.95	0.95	0.95	0.95	0.945823	0.941646	0.937469	0.933293
147	PAK	Pakistan	0.95	0.95	0.95	0.95	0.95	0.95	0.95	0.95	0.95	0.95	0.95	0.95	0.95	0.95	0.95	0.95	0.95	0.95	0.95	0.95	0.95	0.95	0.95	0.95	0.95	0.95	0.95	0.95	0.95	0.95	0.95	0.95	0.95	0.95	0.95	0.95	0.95	0.95	0.95	0.95	0.95	0.95	0.95	0.945823	0.941646	0.937469	0.933293
148	LKA	Sri Lanka	0.95	0.95	0.95	0.95	0.95	0.95	0.95	0.95	0.95	0.95	0.95	0.95	0.95	0.95	0.95	0.95	0.95	0.95	0.95	0.95	0.95	0.95	0.95	0.95	0.95	0.95	0.95	0.95	0.95	0.95	0.95	0.95	0.95	0.95	0.95	0.95	0.95	0.95	0.95	0.95	0.95	0.95	0.95	0.945823	0.941646	0.937469	0.933293
149	HKG	Hong Kong	0.95	0.95	0.95	0.95	0.95	0.95	0.95	0.95	0.95	0.95	0.95	0.95	0.95	0.95	0.95	0.95	0.95	0.95	0.95	0.95	0.95	0.95	0.95	0.95	0.95	0.95	0.95	0.95	0.95	0.95	0.95	0.95	0.95	0.95	0.95	0.95	0.95	0.95	0.95	0.95	0.95	0.95	0.95	0.945823	0.941646	0.937469	0.933293
150	PRK	Korea, North	0.95	0.95	0.95	0.95	0.95	0.95	0.95	0.95	0.95	0.95	0.95	0.95	0.95	0.95	0.95	0.95	0.95	0.95	0.95	0.95	0.95	0.95	0.95	0.95	0.95	0.95	0.95	0.95	0.95	0.95	0.95	0.95	0.95	0.95	0.95	0.95	0.95	0.95	0.95	0.95	0.95	0.95	0.95	0.945823	0.941646	0.937469	0.933293
151	MNG	Mongolia	0.95	0.95	0.95	0.95	0.95	0.95	0.95	0.95	0.95	0.95	0.95	0.95	0.95	0.95	0.95	0.95	0.95	0.95	0.95	0.95	0.95	0.95	0.95	0.95	0.95	0.95	0.95	0.95	0.95	0.95	0.95	0.95	0.95	0.95	0.95	0.95	0.95	0.95	0.95	0.95	0.95	0.95	0.95	0.945823	0.941646	0.937469	0.933293
152	TWN	Taiwan	0.95	0.95	0.95	0.95	0.95	0.95	0.95	0.95	0.95	0.95	0.95	0.95	0.95	0.95	0.95	0.95	0.95	0.95	0.95	0.95	0.95	0.95	0.95	0.95	0.95	0.95	0.95	0.95	0.95	0.95	0.95	0.95	0.95	0.95	0.95	0.95	0.95	0.95	0.95	0.95	0.95	0.95	0.95	0.945823	0.941646	0.937469	0.933293
153	BRN	Brunei	0.95	0.95	0.95	0.95	0.95	0.95	0.95	0.95	0.95	0.95	0.95	0.95	0.95	0.95	0.95	0.95	0.95	0.95	0.95	0.95	0.95	0.95	0.95	0.95	0.95	0.95	0.95	0.95	0.95	0.95	0.95	0.95	0.95	0.95	0.95	0.95	0.95	0.95	0.95	0.95	0.95	0.95	0.95	0.95	0.95	0.95	0.95
154	KHM	Cambodia	0.95	0.95	0.95	0.95	0.95	0.95	0.95	0.95	0.95	0.95	0.95	0.95	0.95	0.95	0.95	0.95	0.95	0.95	0.95	0.95	0.95	0.95	0.95	0.95	0.95	0.95	0.95	0.95	0.95	0.95	0.95	0.95	0.95	0.95	0.95	0.95	0.95	0.95	0.95	0.95	0.95	0.95	0.95	0.95	0.95	0.95	0.95
155	LAO	Laos	0.95	0.95	0.95	0.95	0.95	0.95	0.95	0.95	0.95	0.95	0.95	0.95	0.95	0.95	0.95	0.95	0.95	0.95	0.95	0.95	0.95	0.95	0.95	0.95	0.95	0.95	0.95	0.95	0.95	0.95	0.95	0.95	0.95	0.95	0.95	0.95	0.95	0.95	0.95	0.95	0.95	0.95	0.95	0.95	0.95	0.95	0.95
156	MYS	Malaysia	0.95	0.95	0.95	0.95	0.95	0.95	0.95	0.95	0.95	0.95	0.95	0.95	0.95	0.95	0.95	0.95	0.95	0.95	0.95	0.95	0.95	0.95	0.95	0.95	0.95	0.95	0.95	0.95	0.95	0.95	0.95	0.95	0.95	0.95	0.95	0.95	0.95	0.95	0.95	0.95	0.95	0.95	0.95	0.95	0.95	0.95	0.95
157	PHL	Philippines	0.95	0.95	0.95	0.95	0.95	0.95	0.95	0.95	0.95	0.95	0.95	0.95	0.95	0.95	0.95	0.95	0.95	0.95	0.95	0.95	0.95	0.95	0.95	0.95	0.95	0.95	0.95	0.95	0.95	0.95	0.95	0.95	0.95	0.95	0.95	0.95	0.95	0.95	0.95	0.95	0.95	0.95	0.95	0.95	0.95	0.95	0.95
158	SGP	Singapore	0.95	0.95	0.95	0.95	0.95	0.95	0.95	0.95	0.95	0.95	0.95	0.95	0.95	0.95	0.95	0.95	0.95	0.95	0.95	0.95	0.95	0.95	0.95	0.95	0.95	0.95	0.95	0.95	0.95	0.95	0.95	0.95	0.95	0.95	0.95	0.95	0.95	0.95	0.95	0.95	0.95	0.95	0.95	0.95	0.95	0.95	0.95
159	THA	Thailand	0.95	0.95	0.95	0.95	0.95	0.95	0.95	0.95	0.95	0.95	0.95	0.95	0.95	0.95	0.95	0.95	0.95	0.95	0.95	0.95	0.95	0.95	0.95	0.95	0.95	0.95	0.95	0.95	0.95	0.95	0.95	0.95	0.95	0.95	0.95	0.95	0.95	0.95	0.95	0.95	0.95	0.95	0.95	0.95	0.95	0.95	0.95
160	NZL	New Zealand	0.95	0.95	0.95	0.95	0.95	0.95	0.95	0.95	0.95	0.95	0.95	0.95	0.95	0.95	0.95	0.95	0.95	0.95	0.95	0.95	0.95	0.95	0.95	0.95	0.95	0.95	0.95	0.95	0.95	0.95	0.95	0.95	0.95	0.95	0.95	0.95	0.95	0.95	0.95	0.95	0.95	0.95	0.95	0.95	0.95	0.95	0.95
161	FJI	Fiji	0.95	0.95	0.95	0.95	0.95	0.95	0.95	0.95	0.95	0.95	0.95	0.95	0.95	0.95	0.95	0.95	0.95	0.95	0.95	0.95	0.95	0.95	0.95	0.95	0.95	0.95	0.95	0.95	0.95	0.95	0.95	0.95	0.95	0.95	0.95	0.95	0.95	0.95	0.95	0.95	0.95	0.95	0.95	0.95	0.95	0.95	0.95
162	NCL	New Caledonia	0.95	0.95	0.95	0.95	0.95	0.95	0.95	0.95	0.95	0.95	0.95	0.95	0.95	0.95	0.95	0.95	0.95	0.95	0.95	0.95	0.95	0.95	0.95	0.95	0.95	0.95	0.95	0.95	0.95	0.95	0.95	0.95	0.95	0.95	0.95	0.95	0.95	0.95	0.95	0.95	0.95	0.95	0.95	0.95	0.95	0.95	0.95
163	PNG	Papua New Guineae	0.95	0.95	0.95	0.95	0.95	0.95	0.95	0.95	0.95	0.95	0.95	0.95	0.95	0.95	0.95	0.95	0.95	0.95	0.95	0.95	0.95	0.95	0.95	0.95	0.95	0.95	0.95	0.95	0.95	0.95	0.95	0.95	0.95	0.95	0.95	0.95	0.95	0.95	0.95	0.95	0.95	0.95	0.95	0.95	0.95	0.95	0.95
*CHN	China Cement Association, China Cement Yearbook 2015. https://data.cnki.net/yearBook/single?id=N2016060072
	Ministry of Industry and Information Technology https://baijiahao.baidu.com/s?id=1626895719431133816&wfr=spider&for=pc
	China Cement Association: China Cement Almanac, China building industry press, Beijing., 2001-2015.
	Gao, T., Shen, L., Shen, M., Liu, L., Chen, F. and Gao, L.: Evolution and projection of CO2 emissions for China’s cement industry from 1980 to 2020, Renew. Sustain. Energy Rev., 74, 522–537, doi:10.1016/j.rser.2017.02.006, 2017.
	Xu, J. H., Fleiter, T., Eichhammer, W. and Fan, Y.: Energy consumption and CO2 emissions in China’s cement industry: A perspective from LMDI decomposition analysis, Energy Policy, 50, 821–832, doi:10.1016/j.enpol.2012.08.038, 2012.
	Xu, J. H., Fleiter, T., Fan, Y. and Eichhammer, W.: CO2 emissions reduction potential in China’s cement industry compared to IEA’s Cement Technology Roadmap up to 2050, Appl. Energy, 130, 592–602, doi:10.1016/j.apenergy.2014.03.004, 2014.
Others	Andrew, R. M. Global CO2 emissions from cement production. Earth Syst. Sci. Data 10, 195–217 (2018). https://doi.org/10.5194/essd-10-195-2018.
	WBCSD. Getting the Numbers Right project: Reporting CO2. World Business Council for Sustainable Development. Available at: http://www.wbcsdcement.org/GNR-2014/index.html (last accessed: 29 March 2017) (2014).
	UNFCCC. National Inventory Submission 2023. Available at: https://unfccc.int/ghg-inventories-annex-i-parties/2023. (last accessed: 9 July 2024)
Blank indicates that source of clinker production data is available (SI data5) and cement clinker fitting is not required.
[truncated: 50 more columns]

## Sheet: SI data3
SI data 3. Clinker imports for 42 countries and regions, 1990-2023
unit: kiloton (kt)
code	ISO	countries and regions	1990	1991	1992	1993	1994	1995	1996	1997	1998	1999	2000	2001	2002	2003	2004	2005	2006	2007	2008	2009	2010	2011	2012	2013	2014	2015	2016	2017	2018	2019	2020	2021	2022	2023
1	AUS	Australia				75.8975	508.559	237.3	239.856	188.859	90.821	114.355	330.892	75.5366	558.004	499.206	881.395	978.606	1144.69	1389.35	1840.16	1280.47	1780.53	1860.15	1809.64	2285.35	3136.84	3381.09	3473.92	3583.16	4174.74	3940.15	3565.08	4099.28	4549.49	4090.07
2	AUT	Austria					76.2695	36.7412	109.699	349.669	433.915	319.518	322.524	314.407	314.864	417.019	443.955	532.745	493.468	521.928	447.369	409.047	407.616	393.132	297.009	262.939	261.617	341.565	369.28	412.913	361.532	227.942	129.227	173.391	183.274
3	BEL	Belgium										88.4992	69.5197	114.222	64.4532	248.172	556.506	440.46	536.191	752.025	622.163	664.027	727.763	707.818	676.077	790.318	921.02	989.656	673.419	1022.73	933.525	1085.37	1258.82	1969.5	1823.55	1493.53
4	BGR	Bulgaria							0.003437	0.005034	0.072359	0.00675	0.0016	0.001627	3.08757	3.81466	23.0477	180.254	586.194	123.806	248.736	45.0021	16.167	17.4781	14.5854	4.92858	20.1569	28.8339	20.6122	10.6999	26.0347	16.0014	27.0482	31.4085	1.04445	0.908428
5	CAN	Canada	95.002	97.644	12.411	3.709	0.855	0.029	0.041	111.035	187.4	222.379	0.362604	0.246938	0.054327	54.554	94.413	65.119	7.01204	43.523	33.561	8.973	85.736	13.945	26.831	43.472	77.399		0	0	1.22951	1.53405	0.00143	0.000345	4e-05	0.444
6	HRV	Croatia				6.37825	37.5257	142.525	107.063	161.933	141.086	30.753	4.92528	0.104534	7.32968	144.509	61.6724	0.025		27.488	0.04974	0.001104	0.967482	0.144319	0.043848	0.009412	2.41484	0.659366	1.06489	0.026263	0.00022	46.9329	69.1264	92.472	64.4237	52.2579
7	CYP	Cyprus											0.003207	5.55	17.144	74.627	28.6219	43.3747	17.8189	17.4974	66.7868	15.4552	29.5118	69.7525	6.49827	0.0011	0.0067		6.562	37.059	9.878	0.039809		0.000121	0.0234	0.000109
8	CZE	Czechia				23.5471	2.7993	6.08415	0.326	0.012737	0.080519	0.042089	0.144264	0.146519	6.79193	76.1523	167.711	116.016	109.899	109.398	134.179	101.031	121.682	45.0305	92.8008	144.024	208.515	122.134	17.1557	0.14458	4.17661	31.2316	37.0286	3.22084	0.3006	2.5e-05
9	DNK	Denmark	0.406515	0.273136	0.027125	0.251927	0.17589	0.078	0.150398	0.031687	0.35275	0.027117	0.002		5.57583	27.1994	22.6927	31.3317	43.5249	39.7798	42.481	32.59	22.0476	26.5059	24.7706	27.4826	28.0738	90.2738	120.17	30.0037	11.4339	0.359294	0.453064		309.095	77.8158
10	FIN	Finland	18.7133	9.49416	4.84363	0.109108	0.092687	0.013	26.8961	30.4036	82.9363	137.562	150.391	95.5907	7.26493	67.2968	28.1285	17.5935	95.73	295.416	236.439	0.53621	14.212	16.79	7.51156	2.91162	1.3681	1.76574	4.9651	0.7843	1.64748	20.6967	0.40652	0.509534	1.60323	1.29388
11	FRA	France					162.652	163.752	246.579	562.776	602.12	789.222	855.948	919.174	852.287	793.933	865.212	946.642	1010.06	1590.59	1335.48	784.583	801.286	853.813	697.079	1122.8	954.283	782.942	806.505	0.0002	0.002462	0.00037	1577.44	2194.51
12	DEU	Germany		945.031	1342.52	1291.05	1967.24	1908.33	1229.03	834.772	790.667	703.414	591.025	495.117	523.996	325.302	370.477	289.63	234.816	92.7568	0.002856	0.001515	0.002642	1.6e-05	18.1314	0.00572	0.0004	0.0045	0.01445	0.110651	0.0035		1.9e-05	90.0473	0.000912	4.05753
13	GRC	Greece	48.6085			2					0.021		0.012	0.02765	0.0375	5.24271	1.23672	1.49392	50.9066	50.5829	23.5584	4.24869	12.35	34.7123	65.317	87.439	122.633	126.153	66.2935	94.5275	77.6172	119.883	0.052	153.178	164.891	188.411
14	HUN	Hungary			3.38433		5.26037	0.023312	0.7176		0.11121	0.2618	3.8198			1.9237	0.5832	9.0924	65.4358	40.0993		117.232	69.4692	67.7696	47.7673	68.5059	132.079	106.138	21.6096	13.5955	4.96156	10.328	41.0567	26.3683	30.7244
15	IRL	Ireland			1.08201	32.3807	32.7321	64.9853	69.3244	32.4863	160.104	199.095	178.554	66.6611	79.4753	95.8907	227.774	242.295	398.446	330.948	36.1532	31.9833	15.4594	23.2438	22.5809	25.0041	17.3192	86.6863	86.924	119.654	136.204	99.4807	170.169	11.5109	21.6816
16	ITA	Italy					28.6403	22.9367	27.0202	148.505	101.415	219.674	546.747	1018.49	0	2325.81	0	2859.18	2820.89	2857.66	2100.49	1495.59	797.703	844.108	729.063	457.317	436.549	455.959	299.17	391.249	483.741				1129.72
17	LUX	Luxembourg										17.9371	26.4458	19.4349	15.3795	18.8899	61.6634	38.6454	28.5818	52.5787	41.9106	34.9086	27.2788	34.2327	34.7364	8.82918	12.3845	3.42711	4.00935	4.94053	0.000225	0.001085	0.042102	0.481442	0.087451
18	NLD	Netherlands			785.232	444.217	717.629	616.204	373.953	194.223	65.19	27.0304	147.31	706.124	652.231	679.33	581.267	388.146	494.944	228.817	380.281	511.56	636.694	424.274	562.387	635.622	352.521	116.844	125.668	222.108	191.843		306.422	0	778.014
19	NOR	Norway				0.066082	0.023882	0.029078	0.00625	0.096413	1.11684	0.02625	0.023825	0.100962	0.000675	0.03508	0.37366	4.32111	8.76516	5.91697	7.73342	6.90414	7.07011	0.169903	0.051674	0.375633	0.101101	0.10074	33.7086	0.001763	0.052168	0.0017	1.7e-05	0.004	0.0255	0.0148
20	POL	Poland					9.22	61.4169	45.558	206.5	465.394	555.151	605.775	251.458	66.7732	70.2066	13.7461	33.8641	45.5599	69.0295	270.282	38.9539	100.352	19.9001	7.87282	11.3335	26.1889	52.1035	21.6493	47.8494	121.153		97.1073	0	206.333	1.75334
21	PRT	Portugal	0.002812	0.048	0.008	0.20924	0.007526	8.7366	42.4535	746.297	1052.54	1069.95	1307.81	917.322	5.42138	9.34146	17.3332	20.3541	77.2976	332	198.515	32.1733	34.2164	5.03705	3.93049	1.04444	0.223636	0.0082	1.1	0.00072	0.102202	0.75	0.407463	0.624	0.000605	0.0316
22	ROU	Romania			0.203	0.01	0.528	0.075	1.467	0.305	0.169	0.146285	0.384885	0.09516	0.148299	0.00838	0.002845	0.049792	0.280409	0	500.86	23.6135	75.8118	144.547	144.116	216.322	207.7	132.487	119.981	29.1983	12.1237	4.39423	0	418.621	1.40227	0.3757
23	SVK	Slovakia					6.99194	1.37574	1.605	1.388	1.378	53.6076	0.825	1e-06		34.5497	32.4695	68.8719	57.4469	80.5547	135.375	54.7439	0.19279	0.164769	5.63195	0.168892	26.3582	10.9254	0.718172	5.07546	3.91943	0.01	13.5	30.7459	0.000388	5
24	SVN	Slovenia					0.025	0.025	0.245601	0.02481	0.218342	5.40484	16.485	21.0658	16.2794	95.0024	62.1226	0.085495	12.4299	145.59	5.78231	0.060092	0.132805	98.3706	173.106	2.54924	0.041568	0.117448	0.002	0.034947	0.00033	0.027244	0.02394	0.0001	0
25	ESP	Spain	102.539	127.959	180.782	0.099089	0.0313	234.112	477.077	485.245	1218.99	2417.11	21.31	1104.37	9.52149		10.9887	0	450.536		0.00066	91.8921	4e-06	0.000895	0.001118	1.3e-05	0.000207	50.0029	5.8e-05	0.1739	0.698587	8e-06	193.981	4.9e-05
26	SWE	Sweden			0.378	5.425	23.11	2.998	0.086	0.031	0.163	60.837	0.661305	0.441	0.093524	1.39854	24.4908	14.6014	13.2376	29.3676	37.0163	10.4434	36.629	58.1898	1.716	7.693	71.763	0.28	0.00012	0.133	0.009	0.001544	0.375	0.18	1.141	0.005022
27	CHE	Switzerland	134.062	115.557	105.543	87.2161	79.7736	57.1455	51.6346	48.8976	53.6017	91.8286	132.45	156.91	146.388	47.0498	64.8822	0	115.001	15.2917	8.59594	27.649	74.9457	46.117	7.7e-05	0.003101	82.7857	0	15.7566	14.8969	29.788	0	12.5807	14.3326	13.9613	0.000552
28	GBR	United Kingdom				158.12	244.101	140.886	179.397	347.058	303.143	564.759	342.429	397.359	295.133	579.269	383.85	519.566	555.976	852.233	384.599	196.596	168.598	208.595	192.262	290.071	981.457	876.178	623.602	0.006473	913.484	0.6573	256.001	29.601	6.90078	0.048665
29	USA	USA		1326.4	1565.57	1507.34	2207.98	2857.68	2547.65	3027.2	4133.89	4570.26	3.69683	1.91609	1.9197	2.00636	1.66836	2.94095	3281.78	990.27	621.016	556.362	613.211	605.718	785.749	806.457	874.928	942.364	1685.49	1216.63	1232.95	1381.29	1777.63	2396.39	1242.42	1081.7
30	MEX	Mexico	0.010937			0.026914	0.003687	0.000582	0.008937	0.004312	0.408893		0.084865	0.222414	1.48809	2.67724	1.34518	2.53276	2.34021	3.72453	2.71437	2.59227	1.74178	5.35938	6.75517	7.89437	0.00012	0.335657	0.000339		1.84154	0.836907	16.3362		0.13638
31	BRA	Brazil		4.09668	3.0085	0.340125	4.18864	44.2441	36.736	53.8739	204.567	93.9523	5.57021	122.237	262.592	386.271	2.5	1.79913	58.227	139.761	169.57	349.541	1173.51	1714.82	2030.35	1536.11		934.089	415.082	325.196	487.15	0.000472	15	1	379.09	820.401
32	EGY	Egypt						170.945	30.9473		0.342937	1194.01	5.95528	17.6256	11.438	6.17955	1.46593	1.72712	0.006982	0.97911	69.1359	487.824	843.961	70.3207	80.2967	836.642	4.7263	1448.84	29.6859	0	14.48	19.5576	23.0743	24.0808	25.3391	31.5654
33	TUR	Türkiye	70.0932	109.824	130.245	64.9551	50.5427	289.765	21.9145	130.834	285.9	241.887	110.358	5.487	0.0129	24.289	371.749	168.899	176.22	28.418	380.515	0.0001	58.1759	10.5109	58.0971	0.01785	0.000195	0.0005	21.4005	0.00212	0.3086	0.341882	0.1188	0.472149	0.000377	5e-06
34	IRN	Iran														42	50.4198	247.92	431.823				0.1593	0.1507			0.000132	0.129
35	SAU	Saudi Arabia			0.149534	1523.86	1382.17	166.293	0.1238		19.9307	40.2997	0.363	36.279	40.927	52.405	125.426	794.174	328.958	27.294	30.651	59.679	74.1	61.506	342.293	4560.13	1280.38	54.8242	130.535	11.3648	25.1003	35.9758	4.26364	0.024852
36	IND	India		0.1			0.2355	0.396	0.048	0.154	0.137	0.025	0.582	59.086	1.6496	2.774	2.398	3.696	79.202	232.427	42.079	1313.27	269.74	11.7107	644.408	119.492	35.1478	224.64	250.213	566.317	920.776	1228.17	1226.44	1568.5	1217.04
37	CHN	China			16.9673	47.595	24.7719	26.28	0.090384	9.34453	123.124	442.076	1389.55	2700.29	1794.57	1883.58	1565.76	342.678	345.862	112.544	51.0492	117.006	961.982	1549.84	144.628	247.919	108.562	0.000225	0.002459	0.0704	0	0	0
38	KOR	South Korea	1568.18	102.927	555.552	84.226	32.586	0.320687	92.6287	1.124	4.61179	483.212	137.666	90.693	3.49209	71.3965	23.4913	1.5068	1.6885	2.68701	4.497	7.20163	5.59977	5.37903	5.34	38.1489	19.1952	3.59676	79.1185	38.9686	2.07672	5.05118	1.47716	0.469298	0.971659
39	JPN	Japan	1.68	0.855	1.282	1.859	0.442	0.62	0.502	0.701	0.98	0.687	0.655	0.7	0.56	1.5	3.653	1.362	1.56	1.762	1.461	1.594	1.563	0.69	0.859695	1.515	1.008	1.04	1.43719	2.444	4.254	3.052	1.21	2.921	1.42657
40	VNM	Vietnam											214.541	698.904	1619.49	2013.77	1898.03	2526.9	3615.46	3812.36	3694.54	3539.56	2258.66	656.135		100.75	122.178	116	454.936		286.644	311.953	311.501	121.771	252.822
41	IDN	Indonesia	33	15	0.003999	11.6464	698.854	824.211	950.776	836.891	248.948	0.000503	0.033452	1e-06	0.147119	0.780483	0.947358	2.7975	3.49506	2.85233	36.7333	119.167	699.012	1204.33	1760.92	880.054	2186.81	2178.8	739.356	47.5683	31.2517	0	0	0.190257	0.000425
42	ZAF	South Africa											17.0062	10.0055	17.7534	42.4463	12.2912	336.182	445.022	619.991	383.805	104.228	18.7523	7.6e-05	0.001497	7.99707	0.001296	10.8593	4.5e-05	0.000148	89.5339	211.987	224.91	302.368	0.000514	321.752
43	ARG	Argentina						0.021		25.9769	44.455	46.5	42.0001	2.25	0.010628					30.3474	0.01155	0.01155	0.0105	436.813	37.1487	227.5	0.024	33.1716	99.2329	59.1154	548.466	0.0084	31.5365
44	BRB	Barbados								29.2012	18.5367	0.579687	30.2975	12.8198	11.3155		7e-06		9.71115					0.007019	0.003	8.40921			0.007645	3.043	1.15114		0.0035	0.0798	0.020672	0.003468
45	BOL	Bolivia			7.07293	39.5874	36.5449	38.041	39.4451	23.3972	35.8046	39.8671	50.4241	55.5424	47.7665	44.5512	48.2165	125.271	10.4471	64.2785	71.3205	146.529	138.404	7e-06	167.813	31.6688	5.4e-05	179.092	5.61728	1.7e-05	0.024	1.52976	0.64291		0.191755
46	CHL	Chile			59.612	219.595	92.0678	103.185	533.246	681.138	369.769	110.521	291.936	330.984	226.799	150.043	247.32	403.276	362.703	438.225	635.268	527.86	579.667	1003.17	1192.82	0	1080.38	0	0	0	2142.61	0	1551.43	0
47	COL	Colombia				98.4046	74.6285	14.6221	0.007115	34.4691				15.0001	2.6e-05	0.10108	0.000236			0.05601	7e-06	5.1e-05	0.196302	1.24805	33.2519	283.287	893.369	811.218	1211.16	5e-05	675.071	965.064	2e-05	729.753	605.568
48	CRI	Costa Rica							1e-05	0.000125	116.03	173.866					10.3507	1.2e-05	2.38785	1.5e-05	2.8e-05	0.00011	7.15008	134.997	6.5e-05	6.7e-05	6.3e-05	0.018992	0.048407	0.04828	106.395		0	8.05029
49	CUB	Cuba										0.00125	0.005946	0.024605	0.008183	0.008575	0.010001		0.003299
50	DOM	Dominican Republic													0	0	0.133	0	0	0	0	84.4235	51.5708	145.147	179.588	256.772	0.00452	38.002	123.617	212.562	7.65072	7.501	92.5163	64	0.0003
51	ECU	Ecuador					24.6783	116.861	17.8326	0.006375	65.276			0.001189	0.003755	0.019602	0.009109	0.014378	117.975	301.475	316.981	449.956	92.5859	604.951	657.943	922.271	891.264	38.7	0.000913	32.2114		0.002459	0.002061	0.006402	0.015636
52	SLV	El Salvador					0.197937				0.025461	9.13983	0.404228	0.11516	0.342969	0.1139	25.067	0.026011	0	0	0.00068	0			7.8e-05				0.023438	4.9e-05	18.2219	101.389	0	0	0
53	GUF	French Guiana					40.1885	58.0217
54	GLP	Guadeloupe					225.173	191.386
55	GTM	Guatemala				110.978	155.374	0.102628	0.073312	1.04657	1.98937	0.000199		12.3941		3.80112	5.08733	100.525	111.464	335.26	183.671	171.41	173.949	173.207	132.783	90.7576	96.787	295.465	381.026	437.875	464.453		0	103.873
56	GUY	Guyana		1.30256	0.076726							1.30027	0.650038					0.0266	0.05	4e-06	0.0008	3.30359	0.021828	0.095	1.90051	1.63914	0.005629	9.93669	0.028636				0.0005	0.002822
57	HTI	Haiti
58	HND	Honduras					0.000264	0.023343	0.234292	0.059397	0.033085	0.060429	2.50222	7.20178	41.6325	46.0736	61.5396	69.0296	74.7061	90.5493		0.009202	3.2e-05	0.001263	8.6987		1.7e-05	1.6e-05	27.8127	7.2e-05	153.643	74.8857	28.0601	0
59	JAM	Jamaica			3.4e-05	3.1e-05			13.303	55.7539	6.58				19.8683	0.001744	42.0258	114.957	97.5656	62.196	98.1109	0.016802			0.003397			0.000244	0.001151	5e-06	48.0012		0.0005	0.000131	0.001
60	MTQ	Martinique					184.846	154.847
61	NIC	Nicaragua				0.0918	26.502	61.7425	38.5094	20.4151	27.564	0.202502	103.405	23.7481	58.133	100.361	194	158.119	127.042	180.773	214.394	271.387	255.545	252.326	256.375	275.716	332.465	420.327	6.1e-05	5.7e-05	391.579	0	415.73	579.899	478.777	584.287
62	PAN	Panama						21.0415	12.3491	122.72	389.484	269.058	217.283	103.329	226.705	672.53	733.539	606.767	642.879	718.759	959.979	789.204	81.2475	65.2947	459.493	326.32	321.247	138.458	21.0626	47.6015	75.3374	32.559	0	65.7476	137.467	70.8694
63	PRY	Paraguay		0.018855			0.115695							0.0645	0.00496	1.53147					0.3012	9	40	3.14678	5.27063	40.3489	0.01127	16.5079	0.61004	17.8983	14.949	42.0625	8.27087	11.4996
64	PER	Peru					34.142	714.764	328.042	625.155			0.009401		1e-06	0.018852	0.019219	0.011936	35.3761	0.0064	71.8355	35.1306	668.717	217.048	35.8422	1341.36			236.217	432.319	241.566	0.055	0	0	981.217
65	SUR	Suriname					54.0514	69.8442	0.3045				39.737	42.7576	45.0361	46.2041	11.4663	24.4841	50.3823	36.1182	49.0968	51.6026	41.111	68.6955	108.118	96.5066	63.5853		76.6703	34.0048		45.0676	38.8491	4.65703	41.5646
66	TTO	Trinidad and Tobago					0.035484	0.439937	22.765		9.07491	2.8785	77.5391		5.5782	46.0615	9.22006	44.3788	224.237	114.989	0.122623	0.079429	0.002204	0	17.4359	1.8e-05	0.0009	3.6e-05	9.2e-05	13.346	13.4164	13.5		23.4	2.6e-05
67	URY	Uruguay					65.6783	104.854	211.537	101											1.176	0.000851		153.982	71.9474	68.022	145.14	7.7	15			1.7e-05	2e-06	31.5016	3.6e-05	37.6963
68	VEN	Venezuela					32.5125	0.013125	0.018832	0.0865	20.4833	0.001139	0.051941	0.006428	0.001404	0.082719	2.2e-05	3.3e-05	2.5e-05	2.6e-05	0.000219	0.00018	0.000146		147.598	44.1091
69	ALB	Albania							67.5335	50.1345	77.5794	34.562	42.1174	55.7566	110.851	286.5	249.376	220.519	185.532			0.019	0.03987		5.26	79.6607
70	BIH	Bosnia and Herzegovina														61.2434	30.8895	2.40724	104.065	208.759	145.933	51.6824	0.072		50.0564		0.001509	0.0069	0.019008	0.012274	0.009459	0.008092	10.2491	9.44062	57.3553
71	ISL	Iceland	0.01602	0.019777						0.00175	8.10768	5.00677	13.1202	0.00179	0.000885	0.001978	0.00034	45.4638	11.9215	17.9782	0.62804	0.03026	0.041573	0.049275	0.070805	0.039727	0.093226	0.062207	0.442862	0.05724	0.078237		0.107037	0.323012	0.667846	7.20585
72	MKD	North Macedonia								0.055	0.023921	0.057707	0.09418	0.0767	0.007315	11.8647	0.228236	0.00112	0.035766	0.001		13.5409	1.19114	8.93194				0.153			6.9212	0.9582		26.0765	75.3702	0.025608
73	SRB	Serbia																	1e-06		24.7947		1.32136	5.30947	51.3604	27.4687	36.5407	17.6307		0.00126	8.39047	0.074025	0.49586	1.20635	10.0185	8e-06
74	RUS	Russia							0.658763	0.389909	38.3015	5.67696	12.7756	0.007267	0.01715	48.1555	65.0185	171.533	114.672	232.206	738.861	329.596	265.357	398.46	518.425	595.352	555.836	112.223	62.3852	13.4256	81.9344	6.774	2.75145	0.584832
75	UKR	Ukraine							10.19	49.9283	4.107	29.9143	7.1343	80.6394	101.531	99.3172	167.888	86.3311		55.0214	119.809	1816.24	1598.8	849.488	1446.19	1117.9	687.078	353.416	75.4305	0.00015	452.888	66.856	23.4	9.41438	0.000325	5.8e-05
76	BLR	Belarus									0.707375	0.878425	0.9257		0.02	1.3453	0.32979	0.006963	14.6046	39.0622	9.824	57.9049	139.024	24.6435	0.0139	0.002751	0.000235				0.014885
77	EST	Estonia						3.66506	0.904937	1	3.98432	0.023437	0.136	7.5e-05	0.00016		0.000244	0.001	8e-06	2.40302	25.308		13.4743	0.024	4.68838	4.52613	5.13233	8.99959	4.0278	0.042	8.1848	1.017	187.353	267.384	247.313	226.341
78	LVA	Latvia					18.7013	3.61013	34.3982	9.44	116.829	26.6376	44.3784	0.000125				0.671055	43.7737	0.67148	0.09748	0.1952	0.157735	6.55075	0.70066	0.067759	0.06541	0.1311	0.0819		0.003		0.02682	7e-05	0.42822
79	LTU	Lithuania					15.8	1.5555	0.278	0.191648	0.003312	0.02232	1.14358	0.4654	14.4591	0.0084	22.4963	0.813686	0.122654	104.219	79.124	0.99602	176.461	227.792	173.488	24.0147	0.022294		0.025712	1.21344	0.005076	37.5834	27.8494	12.3085		30.603
80	GEO	Georgia							3.11228	26.4997	32.54	39.3863	39.5818	7.174	0.981	6.7047	65.5155		39.713	118.075	199.272	147.451	134.451	77.7278	217.785	147.05	49.2093	94.6316	44.4396	314.54	485.726	116.391	561.91	16.903	404.371	7.32824
81	AZE	Azerbaijan							8.058	3.612	5.19995	9.698	93.307	33.4186	122.642	168.177	546.972	680.462	685.978	721.205	890.249	616.729	643.318	786.34	1102.6	1295.82	1032.86	182.146	252.421	0.001	0.834828	0.0016	0.015	0.02074	5e-05
82	ARM	Armenia														0.001			0.04402	0.0612						5e-06			10.0908	8.29703	10.1828	34.2975	79.0514	97.6281	74.1024	81.8317
83	KAZ	Kazakhstan									5.0123			0.6971	0.4293	0.1471	0.826679	191.765	75.503	86.043	17.8804	13.8016		5.88643	16.0895	23.7492	14.3993	19.156	8.15581	3.77097	0.001225	8.1874	2.5391	0.001552
84	KGZ	Kyrgyzstan													0.0482	0.01	0.586		0.010917	1.4372	0.275975	0.1019	0.097452	0.09675				0.5576						0.0045
85	TJK	Tajikistan																											0.00515	0.080613		6.6e-05	0	0.392	0.021981
86	UZB	Uzbekistan																													37.6743		19.7423	2.49856	2.41619
87	TKM	Turkmenistan											7.85684
88	MDA	Moldova					1.6415	5.04	4.101		1.708	0.015125	18.5449	0.003245	0.00122						18.7788	0.33975			9.4725	8.47624	2.46992							0.000225
89	DZA	Algeria			2.831		0.112002	1.3906	0.09		3.9e-05		0.02196			402.283	229.438	7.31795			0.00206	0.019267	337.617	89.4896	315.167	428.961	359.878	601.11	1240.1	792.129
90	AGO	Angola																		156.155		451.991	417.801	742.778	1093.72	531.978	693.329	1230.79	0.001018		0.085557	211.35	1.5541	1.0698	0.00127
91	BEN	Benin									252.518	321.648	606.603	790.949	537.708	651.669	528.142	606.124	566.27	580.157	581.696	561.839	592.042	766.469	644.778	684.631	680.819	601.937	259.171	221.043	349.295	540.577	637.959	24.5434	37.9695	481.453
92	BWA	Botswana											0.621023	2.12169	1.19798	0.2766	1.69424	0.475698	0.26875	0.776002	0.49196	0.016678	0.327528	4.74531	5.86187	3.51022	6.52972	22.3337	11.5711	10.1186		1.54681	4.27518	0.001175	14.3847	15.606
93	BFA	Burkina Faso						25.2358	136.146	148.865	138.847	165.677	106.821	29.6583	31.2512	228.55	166.017	254.154	349.187	382.021	420.967	490.341	484.837	494.529	681.001	524.565	391.814	988.857	1360.13	1678.56	1453.65	1267.83	2076.74	2383.77	2006.27	2629.12
94	BDI	Burundi				9.69942	1.65187	1.83132	1.04701	0.95275	1.98519	2.19306	0.63985	0.5165	0.6315		0.770273	0.06			0.0017		0.0001	27.3236	50.1628	63.4107	60.8424	51.7559	51.2067	9.3144	88.9108	192.054	14.424	13.5394	41.0754
95	CMR	Cameroon						335.444	274.384	414.424	437.8	434.886	533.95	605.7	524.885	405.075	616.83	712.223	756.346	663.78	554.749	747.402	713.813	582.715	772.863	630.69	875.917	1340.96	1888.28	2628.55	1991		2461.13	2864.96
96	TCD	Chad						0.001875
97	COG	Congo (Brazzaville)																		0.001328		0.247925	0.08535	0.072894	0.594	1.23225	0.000972	41.3698	146.374	145.161	35.17	0.713528	0.389214
98	COD	Congo (Kinshasa)																										1.45833	1.83811	0.99005	3.5e-05	0.043	5.79403		2.88243
99	CIV	Côte d'Ivoire						632.126	784.118	1184.08	1238.4	1407.99	1215.62	1181.81	1201.54	719.653	1035.99	926.333	941.667	1038.3	1097.04	1024.88	1156.49	972.099	1395.32	1490.53	1727.32	1911.7	2095.35	8.6e-05	37.2	3071.36	3671.79
100	DJI	Djibouti																				38.7268
101	ERI	Eritrea														17.9639
102	ETH	Ethiopia						0.016699			0.001515	0.002625		0.005233	8.5e-05		0.002016	0.00203	1.01992	1	12.5	210.566	144.386	294.56	33.9047	3.59532	3.9e-05	0.511069	0.282383	1.24131	1.07061	0.085404	0.002073	0	1.41093
103	GAB	Gabon				0.021351			1.00058		0.121003	6.00914	0.015	0.025				34.419	89	12.0007		0.009655	22.0001		69.7308	35.7582	133.643	202.117	393.528	153.339	393.627	483.55	439.288	434.88
104	GHA	Ghana							53.0769	0.773671	885.15	578.809	1101.45	981.029	983.833	435.436		2752.11	3225.86	2558.99	2191.25	1817.4	2167.19	60268.2	3475.25	2770.66	1430.57	39.9516	2859.08	3657.66	3687.98	462.39
105	GIN	Guinea						183.064	209.919	151.16	302.788	230.05	146.186	144.982	281.765		266.027	54.3545	0.150659	11.6571	101.187					474.027	738.522	936.459	952.033
106	KEN	Kenya			0.00048					0.02425	9.7e-05	22	0.135		14.021		25.025	181.879	199.285	610.284	514.342	661.868	985.657			1427.11		1973.09	2003.04		2016.67	1678.87	47.5	1065.64	656.401
107	LBR	Liberia
108	LBY	Libya																		0.322536			3.5
109	MDG	Madagascar		0.699625								0.000148		0.885			0.8	0.0006		3.74	29.9735	6.78704	33.2	29.5538	11.3672	7.6428	0.1764	7.21281	0.94588	10.8249	2.6513	1.117	1.63582		0.00025	0.020057
110	MWI	Malawi	0.000148	0.000684			0.031	4				0.004405	0.29531	0.75747	2.99879		63.6668	96.3034	119.822	0.534796	173.27	176.523	161.839	154.143	154.402	160.079		190.479	131.868	138.964	25.7244	74	122.041	45.34	122.766
111	MLI	Mali							0.102221	0.06612		0.135812	0.106835	0.055	0.025		0.13	0.105	0.2813	8e-05	3.326		3.02	0.345	35.5168				23.3348	112.262	227.679	325.641
112	MRT	Mauritania											159.189	243.32	291.992	251.527	403.069	236.359	426.217	589.932	295.506	486.726	552.959	550.562	626.47	676.902	818.972	824.345	665.999	795.033	890.223	749.828	823.558	1125.91	909.71
113	MAR	Morocco				72.502	1.38		0.000356		4e-06	2.33744	13.2523	11.8106	15.5432	14.9816	23.9818	21.8927	67.2784	271.397	445.8	0	342.03	83.6919	87.6825	0.25		0.024507	0.67386	4.65501	16.0298	141.33	232.006	102.491	0.000215
114	MOZ	Mozambique											47.0654	79.6804	156.59	26.7169	34.7491	333.882	651.556	278.165	463.953	289.329	209.434	225.107	0.166941	162.764	155.512	643.762	0.475931		0.4796		0.2	10	183.9	484.55
115	NAM	Namibia											1.65656	1.2994	0.540737	0.005746	1.45619	0.429525	0.026973	0.022629	0.106265	0.005137	0.083958	0.020086	0.026905	0.036558	0.027355	0.033169	0.052058	0.097929	87.4842	0.907634	0.045191	0.001297	0.002031	0.000707
116	NER	Niger						0.001062	0.001125	0.0015	0.01705	0.075	0.075646	0.0151	16.3919	18.0086	39.1868	40.7412	27.1749	17.1325	34.7873	20.4804	6.57111	58.2723	57.4742	28.3228	21.0607	41.4322	4.98993	39.2551	0.44815	0.105014	1.26123	4.7898	6.09527
117	NGA	Nigeria							45.2636	53.4649	29.8456	17.001	16.8153	117.543	6.881	30.4069			50.4813	373.994	353.586	59.1627	17.5639	19.181	83.5279	39.2414	187.766	86.4418	66.3688			8.9e-05	0	0.055927
118	REU	Reunion					209.967	292.23
119	RWA	Rwanda									0.405	0.685128			0.00075	0.11123	0.9115	0.7735	2.78728	4.52895	4.75255	9.13277	6.5081	7.30894	10.2414	11.2023	9.19664	18.3596	5.6e-05	2.8482	8.14125	0.552296	118.351	92.873	0
120	SEN	Senegal							170.885	105.331	110.318	174.261	337.19	389.628	282.974	613.895	238.008	457.571	514.116	705.567	503.683	490.463	608.324	37.8432	0.281	38.108	0.000625	121.444	241.876	326.065	517.886	535.047	895.657	1441.42
121	SLE	Sierra Leone											53.011		25.3178												20		212.4	229.5	219.058
122	SDN	Sudan						0.001187		0.076	0.4	0.9		0.00015	0.018	0.0003	0.107986	2.24175	1e-06	0.044	0.00021	0	70.7879	31.5682	0.0235	0.0001	7.6e-05				5.01561
123	TZA	Tanzania						0.069155	1.30359	0.125967	0.727706	0.132	11.3336	34.216	139.296	157.314	111.852	83.2834	80.6816	52.352	249.683	246.517	229.719	308.719	431.199	411.33	999.538	568.399	316.177	85.0159	255.395	298.734	552.037	342.474	325.803	458.244
124	TGO	Togo					176.324	356.781	509.881	509.152	598.965	556.51	536.149	607.424	718.028	723.184	684.546	594.704		877.691		249.359	37.5957	43.1196	78.529	1074.94	92.6151	319.953	70.8301	1.94816	12.032	84.701	899.981	19.1902	182.176	455.427
125	TUN	Tunisia				1e-06		2e-06			0.007875	31.71	231.368	666.934	512.619			84.9078	66.389	2.732	39.1981	88.2995	78.9359	57.6442	110.257	82.5884	25.0188			17.5003	29.3056	44.0049			43.46
126	UGA	Uganda					1.74281	0.646273	238.012	119.415	138.339	114.323	53.5587	160.604	90.2351	148.074	172.647	192.419	316.652	476.669	518.277	458.902	492.398	459.693	707.422	792.785	784.752	1033.99	1129.01	24.045	1849.01	1626.1	1432	2863.96
127	ZMB	Zambia						1.09332		0.105601	138.293	3.55926	2.43	4.77383	0.144312	0.29962	11.5029	14.9608	70.8778	3.883	0.009975	0.00412	0.011934	0.057113	0.002337	3.60246	0.0001	0.010541	0.004	0.083711	0	0.025		0
128	ZWE	Zimbabwe											0.204908	3.56415	4.8844	2e-06			6e-05		0.001861	0.000145	44.139	19.4704	17.85	0.0418	0.00115		70.6125	6.03384	7.92649	28.3591	23.5954		97.0611
129	AFG	Afghanistan
130	BHR	Bahrain											71.247	33.002	26.025	56.05	60.089	185.772	18.189	124.483	454.359	431.521	182.736	36.3354	416.565	147.206	341.961	249.755	215.699		1059.54	572.641	646.714	721.809	575.803
131	IRQ	Iraq																									221.696
132	ISR	Israel											463.25	3.63364			0.019885	131.698	22.9671			0.755425	0.819147	34.778	33.4276	515.038	773.621	1089.94	1226.76	978.473	437.53	525.709	811.979	945.045	789.411	583.459
133	JOR	Jordan																		0.00102		126.577	841.783	580.51	40.0408			4		41.6593	914.512	656.491	93.8926	549.161	1311.56
134	XKX	Kosovo
135	KWT	Kuwait											720.654	632.197	416.197	731.955	1362.75		526.617	938.102	1951.55		512.915	507.604		621.66	1142.45	0.019091	1610.09	52.4021	1430.83	2117.65	1873.31	1596.33	2206.81
136	LBN	Lebanon								822.948	306.762	12.727				0.44036								20		46.155	30.305							30	37.7
137	OMN	Oman	38.5187	125.347	28.7649	103.269	161.374	140.792	349.261	304.261	49.6196	44.2491	0.126616	0.020105	0.159173		144.739	224.864	202.382	152.489	850.521	372.073	392.896	132.705	488.085	1181.7	826.364	977.963	858.048	538.774	715.518	0	0	1913.97	733.377
138	PSE	Palestine																		0.218489	0.088799	0.053821	0	0.108515	0.083018		6.28497	48.8367	0.000999		0.966636	0.105227	0.089857	0.133023	3.9832
139	QAT	Qatar											227.588	131.753	388.821	120.843	146.39	1525.83	468.71	969.802	2519.26		1355.44		580.255	75.9222	105.554	1176.32	522.4	269.052	48.3412	101.829	119.934	291.079	332.459
140	SYR	Syria														72.2823	204.673	144.437	17.2388			255.504	192.644
141	ARE	United Arab Emiratese		2e-06		307.132												4038.79		5939.6	4463.82				5.34425	135.564	72.1167	82.5919	148.526	343.088	334.186	627.548	432.762	0.134104	46.2168
142	YEM	Yemen															41.7285	0.099322	15.4322	2.29524	1.55883	30.0395	139.844	141.836	831.269	388.209	514.684	201.669			1.95869	148.648
143	BGD	Bangladesh	123.325	144.54	170.5	149.474		20.274	494.559	846.293	1147.45		2933.78	3828.73	4428.89	3482.87	3983.51	6992.66	7046.88	7153.99	6978.89	6584.28	8461.68	8642.6	9952.32	10024.9		12374.5
144	BTN	Bhutan				0.180488	0.632875				0.147929	0.120625						25.2469	19.9558	0.750841	3.67437	8.45097	12.8763	24.8055	22.9991
145	MMR	Burma			0.021261									0.522445									16.3217	37.6976	216.594	132.227	2.19267	2.2732	62.5932	15.8543	1e-06	35.8298	177.054	57.5301	1.56675	0.97145
146	NPL	Nepal														455.138						488.852	1584.11	1333.07	1031.71	1138.2	1124.1	1041.49	2436.12	2949.54	3109.54	645.032	767.516	258.124	6.04116
147	PAK	Pakistan														0.165	0.038	3.531	15.823	0.096	0.177	0.152	0.251	0.001		0.034	0.149	10.651	16.674	50.702	85.588	83.363	49.8747	84.465	3.999
148	LKA	Sri Lanka	169.463	316.748	359.066	382.961	491.079					731.577	811.492	960.246	692.419	690.004	836.332	1012.23	1187.46	1098.27	1295.93	862.545	1095.83	2347.23	2337.55	2644.15	3077.74	2881.71	3084.2	3879.64		4411.14	0	0	1464.53
149	HKG	Hong Kong				894.46	1025.66	775.976	604.377	248	367.033	383.182	346.475	648.32	1373.14	1220.67	1162.63	1376.64	336.177	452.463	376.658	251.238	422.138	1061.94	770.999	737.534	1180.54	182.277	571.036	458.927	621.602	273.975	262.895	577.799	567.557
150	PRK	Korea, North
151	MNG	Mongolia								0.157625	0.015	0.096937	0.07838	0.59545		2.1783	4.60285	9.48348	20.3954	18.9699						21.0083	26.782	107.744	1.9985	4.85358	0.76268	6.23295	0.01	0.28942	3.395
152	TWN	Taiwan
153	BRN	Brunei			0.719194	117.11	35.5908			146.102	188.449			177.903	147.064	111.168	176.585		273.746	204.138	184.484	168.509	258.769	275.756	308.033	256.699	175.982	181.799	192.6	283.985	0.0032	128.919	102.219	229.275	371.07
154	KHM	Cambodia											118.196	11.0335	0.491274	0.23336	5.56701	2.296	12.3373	4.462	5.4428	11.97	9.74347	17.6707	4.15763	1.05407	52.2506	5.84721	0.166317		49.9047	264.167	6.03795	74.7239	0.0425
155	LAO	Laos																					90.2209	167.918	194.115	155.341	75.5377	88.0585	342.459		369.892	50.791	11.4187	3.75985
156	MYS	Malaysia	121.628	664.293	1367.44	1916.43	1458.79	2103.3	2661.49	2724.03	1118.07	741.191	1239.52	1139.15	1806.94	1.29798	1248.66	1381.57	1496.41	1502.7	8191.33	497.708	7703.61	2721.4	2717.35	2757.44	2716.3	2554.59	1378.75	1056.34	0.12	0.065	653.894	426.914	777.841	1121.11
157	PHL	Philippines							1866.73	1517.8	269.173	304.684	8.02	94.221	244.236	79.0772	5.97432	31.5773	22.6834	64.8451	38.3091	55.4546	206.071	26.7711	762.22	1640.04	1320.14	2322.87	2942.43	4239.53	4975.69	4179.18	3599.89	0	3569.52
158	SGP	Singapore	1563.85	1941.4	2283.71	2796.93	3129.77	3228.46	3248.8	2892.98	1787.9	984.999	589.341	334.481	24.5827	304.056	239.878	204.21	155.093	221.32	144.275	159.012	189.927	58.4299	25.9275	0.87092	4.10144	0.153271	0.20277	0.10049	0.076042	0.62738	0.066572	0.02491	0.146242
159	THA	Thailand	2215.75	3082.45	1850.31	0.1	77.2291	481.492	179.591	6e-05	0.005003	16.9711	5.24109	0.013506	3.02935	0.02966	0.07417	0.00871	0.022568	0.1721	3.92161	0.355696	0.592237	0.835411	0.339319	0.310629	0.154871	0.000735	0.492278	1e-06	7.65285	15.2429	0	0
160	NZL	New Zealand					0.002		0.021					38.058	90.8328	189.488	226.137	146.264	127.733		0.048153				20.8253	60.762	72.465	64.296	105.035	0	95.007	124.474	118.081	162.679	0.326	0.273
161	FJI	Fiji														0.0024	0.0215	0.132943	53.3536	81.4382	27.2299	50.6076	54.3641	27.5546	27.1085	83.8332	288.976	174.815	249.161	226.897	161.356	194.951	120.192	107.292
162	NCL	New Caledonia										92.2481	57.8619	60.4782	57.6295	56.832	97.4497	80.0288	87.415	92.1	105.66	91.08	122.312	98.46	97.54	77.0501	72.94	94.84
163	PNG	Papua New Guineae									238.882		271.283	10016	59.6912	62.016	145.2							682.742	133.366							428.295	101.626
Clinker trade: UN Comtrade Database. https://comtradeplus.un.org/. (last accessed: 2 June 2024).

## Sheet: SI data4
SI data 4. Clinker exports for 42 countries and regions, 1990-2023
unit: kiloton (kt)
code	ISO	countries and regions	1990	1991	1992	1993	1994	1995	1996	1997	1998	1999	2000	2001	2002	2003	2004	2005	2006	2007	2008	2009	2010	2011	2012	2013	2014	2015	2016	2017	2018	2019	2020	2021	2022	2023
1	AUS	Australia	15.5023	63.7723	249.271	207.097	118.3	158.602	116.308	112.367	280.425	249.153	150.532	287.217	78.5544	67.0372	23.6146	35.4247	0.05454	0.011525	0.00249	0.56361	2.64355	1.68914	3.14993	1.74598	4.88441	0.871926	0.592145		30.2	0.00786	0.0012	0.18068	0.998514	0.093929
2	AUT	Austria					0.002		0.217807	0.630846	0.005324	7.67766	23.0138	60.2118	47.401	54.1509	58.3536	32.8774	136.381	189.606	244.037	147.913	46.5595	173.312	121.529	72.2463	67.3976	66.5533	30.6599	38.473	30.1824	20.3614	16.1768	5.62473	1.57305
3	BEL	Belgium										1285.79	731.053	706.22	767.78	738.053	822.909	831.312	1166.28	912.402	885.629	934.034	571.622	734.305	634.571	768.64	723.688	670.928	584.498	643.431	718.115	917.672		943.351	832.428	801.043
4	BGR	Bulgaria							1734.33	1405.7	564.048	279.982	286.078	39.7914	435.202	602.632	392.414	338.505	293.031	358.192	120.588	14.8359	5.24628	8.13092	296.372	237.02	270.307	355.956	473.552	43.0462	341.998	65.3016	49.1042	259.69	9.76555	98.1974
5	CAN	Canada	460.075	544.888	988.348	882.935	961.894	1329.55	1252.86	1019.31	1657.81	1344.43	0.882388	0.660913	0.704734	1028.43	765.524	793.007	608.467	577.64	897.173	490.044	501.447	531.674	673.736	705.085	614.779	683.685	672.244	672.85	0.076	574.802	3.125	664.106	598.033	510.045
6	HRV	Croatia			11.727	2.903	2.2	5.5		22.0175	0.445034	54.9001	243.875	104.238	39.9807	0.28544	44.2972	196.594	244.043	310.378	235.377	169.394	176.403	103.281	284.48	324.542	398.469	351.009	214.718	345.765	163.716	1.57929	90.1582	0.110271	0.213765	0.102794
7	CYP	Cyprus	348.949	116.375	219.505	283.065	604.014	521.66	523.96	641.667	341.902	296.5	121.08	96.7141	245.656	200.461	31.215	37.891	91.635	5e-05		30.286			6.535	739.613	9.38	1016.07	854.213	109.483	0.42214
8	CZE	Czechia				56.678	74.6504	137.772	74.8502		428.66	438.804	413.013	213.96	77.1712	44.4104	91.6264	28.0217	32.5204	29.9232	19.0384	85.4266	88.2351	0.17287	10.8926	1.22206	0.095575	30.3204	0.017252	18.1377	5.9031		2.56162	3.73492
9	DNK	Denmark	17.1197	44.7148	23.5735	40.4304	252.382	280.513	245.11		116.681	111.903	90.394	97.5064	103.261	67.3712	54.177	55.7908	12.1457	10.0019	7.28704	7.78368	11.9229	2.60392	24.6714	0.039243	12.3912	0.840511	0.013892	0.005968	11.6194	0.127647	0	0.041804		0.090452
10	FIN	Finland	0.023104	0.025168	0.007	0.184722	0.127636	0.098625	0.069304	0.059968	0.094608	0.043199		8.7e-05	0.0001	0.03975		0.05616	0.01024		0.0026	0.0474	0.0298	0.058025	0.02768	0.0181	0.079175	0.01845	0.000325	0.00375	0.00725	0.204618	0.0002	52.5558	6.40792	0.00013
11	FRA	France					1076.79	1071.24	799.512	1105.76	866.134	460.304	395.426	491.76	555.646	479.952	460.362	310.228	325.352	325.897	256.521	163.686	282.673	179.184	210.901	218.646	194.116	194.025	186.565	3e-05	1755.29	274.259	198.072		148.786
12	DEU	Germany		0.93301	4.7343	0.096101	44.4052	52.246	3.33704	172.674	181.897	449.123	328.452	785.008	493.092	1001.02	868.384	919.831	682.97	1051.73	4.7011	0.00288	691.266	761.602	476.063	443.082	420.073	4.20282	3e-05	0.0013	524.57		61.2426	0.001	124.792	147.075
13	GRC	Greece	482.448		879.497	1143.41	1105.78	1203.7	1173.49	695.384	565.508	353.994	641.771	549.377	400.7	762.544	257.136	304.75	356.077	848.93	888.616	851.948	722.152	459.716	1913.1	1828.64	3225.7	2257.09	1685.14	1569.03	944.417	5.29912	948.303	120.188	25.0386	0.00051
14	HUN	Hungary					53.7581	3.73537	43.1218	37.7274		2.38267	7.4868	0.044	125.482	41.0059	78.5898	27.3281				1.7004	0.2943	0.021	203.634	8.55132	7.79267	108.39	37.9712	83.7909	29.301	32.5381	10.2669	41.9764	20.4822
15	IRL	Ireland			51.1522		3.97763		5.25498		0.027437		7.03973	6.44729	408.56	1.635		4.8e-05		16.033		4.82299	0.000937		16.6976	0.0001		60.4588	28.5323	18.7128	65.9359	210.167	161.238	30.5832	6.81529
16	ITA	Italy					108.23	192.205	127.297	131.102	146.729	91.8953	95.2197	99.4717	82.8346	55.316	8.96544	19.4267	61.0902	151.334	26.0957	0.031227	52.6992	45.3217	47.1552	129.337	206.598	212.933	154.213	249.148	217.54		177.01	132.985	28.6957
17	LUX	Luxembourg										511.479	478.22	462.937	416.007	299.163	392.951	343.345	364.463	186.625	181.687	61.6482	7.69464	4.21464	0.001003	0.002385	0.000333	0.000109	0.008467	0.001592	0.004075	1.6e-05	8.72596	0.00025	0.013614
18	NLD	Netherlands			0.184597	3.14277	1.96883		59.8509	5.983	14.515		0.00303	1.25933	1.32465	2.32585	1.56213	2.51321	0.06113	10.7251	4e-06	0.351963	0.034085	3.91053	31.3251	2.02212	0.398347	1.42129	0.25693	0.977239	0.563864	0.912834	2.30645	7.23297	23.0993	3.5001
19	NOR	Norway
20	POL	Poland					1088.24	812.073	436.988	126.732	97.6976	56.5459		2.89408	6.46136	87.4698	226.981	259.439	856.035	181.69	172.005	136.624	82.7297	44.3379	99.7108	147.451	239.491	144.075	166.602	93.6732	7.14663	33.9543	93.3334	33.165	45.5779	22.764
21	PRT	Portugal	85.6541	30.1613	0.023382	0.55	195.534		6.86512	0.05	0.003999		0.001		41.6263	275.692	598.901	1338.35	1175.83	1255.91	1498.4	1546.91	1872.74	923.862	992.692	1402.01	1860.42	0.02145	1.78777	1972.09	1479.06	960.267	0.129248	292.578	0.047214	4.90355
22	ROU	Romania		42.224	146.224	510.815	15	0.05	0.06	0.031	92.785	242.275	625.988	512.593	572.684	360.639	669.204	465.66	608.616	243.116	111.719	0.182	0.26505	24.8097	84.8736	7.09244	2.65219	0.0048				4.54285		15.6715	1.76531	0.0008
23	SVK	Slovakia					7.37281	5.72988	0.004409	0.056898		0.045601	0.04508	3.84778	9.5006	27.6953	4.7669	42.4009	57.916	36.6879	59.7594	128.88	69.37	2.5e-05	0.013691	8e-05	23.5687	5.01306	4.34808	10.6676	12.9748	0.01203	11.82	14.7759	0.00015	10.9274
24	SVN	Slovenia					21.0842	6.62964	3e-05			2.29625	0.0251		2.16279	7.5893	18.7014	58.7651	21.8337	0.002308	0.001208	2.3e-05	43.301	143.145	179.506	256.109	351.686	316.823	251.647	325.78	310.879	299.361	285.584	277.413	193.796
25	ESP	Spain	663.26	375.706	391.599	955.395	1417.93	1660.39	2274.25	1585.52	548.691	61.9306	1.15281	0.0015	45.6571	5.17468	0.462464	5.86247	7.6	0.836884	2e-06	1275.44	48.4842	0.109154		197.044	4128.33	0.102	0.002427	409.163	6.39192	55.4954	0	762.874	8.255
26	SWE	Sweden			0.002	0.033	153.911	7.932	14.881	1.01		0.0245	0.002105	0.036	0.034352	0.086208	0.066	0.698	0.015	0.032	0.217	577.582	505.584	267.884	0.0481	0.01	0.019437	304.184	438.288	47.7113	88.002		0.001	144.06	231.205	0.053235
27	CHE	Switzerland	2.07388	7.45955	22.2089	18.1981	20.8633	14.4501	81.1908	109.989	117.419	100.372	14.4381	123.026	130.206	106.617	0.025	121.014	103.367	114.075	6.5716	70.2071	6.98333	0.103976	0.035455	7.5e-05	1.5e-05	16.3092	0.003147	0.000338	0.000142	0.006794	0.035341	0.00058	0.102857	0.020472
28	GBR	United Kingdom				42.5401	15.8616	24.6853	87.6083	346.812	548.641	958.883	255.684	171.474	160.719	62.346	73.0387	144.201	105.653	30.6623	15.5286	2.84576	3.70482	15.5284	31.1759	24.0557	21.0592	7.3754	52.4912	0.1078			0.0098	0	0.304	3.53829
29	USA	USA		24.389	9.139	13.057	19.052	30.18	29.07	30.901	34.972	15.425	0.014671	0.011196	0.050679	0.026815	0.012038	0.021258	41.847	13.794	45.883	27.307	21.434	14.926	16.421	34.886	66.6698	18.001	9.486	3.931	21.607	7.041	5.279	13.383	36.832	11.201
30	MEX	Mexico	38.9879	0.02515	0.108066	0.652374	0.559615	861.161	2076.09	1846.15	905.296	865.113	395.624	329.54	214.627	29.0317	204.248	675.938	450.375	373.98	637.987	311.563	130.377	446.773	786.94	800.964
31	BRA	Brazil			2	55.3273	79.1412	76.531	86.337	70.6221	90.0211	106	55	28	128.935	2	262.338	283.739	106	0.0096	115	4.08	107.7	89.1225	9.05695	31.4392	0.0015	129.9	0.00325	0.001	0.04095	1.5e-05
32	EGY	Egypt						0.95						8.4837	459.068	3109.58	6702.54	4432.45	2125.16	1439.35	385.09	86.2696	23.6038	421.793	87.8536	29.6672	15.8863	20.723	74.9263	577.817	1460.44	582.278	960.579	4716.21	6773.79
33	TUR	Türkiye	912.908	1265.2	1711.39	1061.69	1968.1	1416.16	803.96	1021.46	715.485	1077	10.65	4.7	32	69.415	142.363	0.525	0.001	56.595	30.3961	4.247	2770.91	2399.23	2976.85	3	112.405	309.835	20	592.438	31.757	146.56	333.61	36.9903	1e-06	165.33
34	IRN	Iran								44.2855	180.362	387.136	711.256	1403.69	310.598	56.3163	86.2699	61.7061	39.678				727.571	1360.61		2837.12	3311.65	3173.58	5095.13	6047.2	6253.23	11022.4	9659.82	10648.7
35	SAU	Saudi Arabia		1378.63	747.497	0.498378	10.7467	177.14	701.733		809.44	1114.4	1236.89	691.128	962.847	251.373	74.649	43.855	20.883	50.654	20.727		733.174	579.409	39.776					41.6593	2614.43	5111.6	3283.4	5137.17
36	IND	India	0.852	42.609	267.38	1050.79	965.944	266.256	394.451	533.851	396.62	1343.19	1698.38	1231.26	1643.11	3839.71	3276.48	2702.78	911.067	406.816	729.986	725.165	1059.37	1330.49	999.643	2001.06	3874.94	2412	3381.97	3159.82	3621.67	998.076	993.669	898.884	122.801
37	CHN	China			522.146	53.313	242.991	927.156	2310.41	2357.13	436.536	400.179	234.387	102.393	77.9243	379.579	1027.47	10784.9	16722.6	17814.4	12807.3	7124.8	6335.54	1811.74	2756.66	3597.81	3733.95	10.2755	66.6693	1.12578	1503.48	440.697	0		94.2396	218.527
38	KOR	South Korea	372.911	388.723	672.742	3042.74	3198.19	2497.76	1543.82	609.375	1577.61	1376.87	901.219	1620.2	674.139	380.778	1361.31	1899.25	2210.07	2218.51	3446.69	2132.68	4677.74	5481.35	5674.57	5551.82	5587.67	4496.09	3214.4	2251.38	4287.2	5440.12	4239.97	3533.46	1650.11
39	JPN	Japan	2554.89	3009.23	4986.18	6084.26	5806.72	5817.88	4774.44	3655.43	1788.83	1772.34	2608.84	3556.33	4160.13	4905.1	4941.52	4051.93	3271.41	3667.26	4635.57	4609.96	4897.48	4862.55	4321.84	3548.97	3846.93	4416.27	5520.51	5217.79	4432.96	4471.73	6008.4	5369.69	4402.6
40	VNM	Vietnam											1.184		0.178652				55.7074	62.4179	30.3847	24.7838	1655.43	6565.86		10662.4	12380.9	9927.43	9467.29	15138.3	21772.9	21445.9	22628.1	27193.9	15566.3
41	IDN	Indonesia	711.38	520.003	1032.22	518.68	52.6	7.504	3	57.771	1030.98	3103.07	2821.14	2505.75	2581.97	2290.41	2618.57	2231.5	5509.07	5067.96	3142.04	3487.49	2014.83	1430.19	94.3691	735.387	253.562	575.291	1397.21	2153.31	4761.21	0	7834.19	10218.7	7587.9
42	ZAF	South Africa											323.488	63.269	17.8478	0.479675	0.65572	58.8409	0.130596	0.26122	0.528945	4.07936	25.775	50.116	1.02619	5.64278	0.441223	2.40963	6.73362	105.382	1.03291	199.572	1.2071	0.003968	0	1.19349
43	ARG	Argentina				94.6256	46.9998	89.1976	90.5219	31.5963	28.184	30.3271	0.00039	0.00546	54.4066	61.8667	117.99	82.8362	35.9142	0.00188	28.9438	104.652	70.1019	7.39628	34.7792	9.99769				0.00368
44	BRB	Barbados									0.023644					1e-05	7e-06	5.35596		8.5e-05	1.5e-05				2e-06			2e-06	9.8e-05	2.7e-05		0.006336
45	BOL	Bolivia					0.22555	0.034378																						158.194	72.2652	42.0626		5.80255	8.9e-05
46	CHL	Chile						2.2e-05						0.00252		0.0025	0.001		8.12425	28.1684	3		5.76	11.84	20.5312	2.92	0.007833		0.0031		0		0.011181	1.02188		0.000123
47	COL	Colombia		805.314	744.951	694.939	296.352	315.642	536.04	362.185	366.43	364.976	515.387	552.19	670.057	548.314	385.633	62.22	77.4747	163.848	130.19	77.2997	9.2e-05	0.000501	0.00493	0.002654	0.0039	4.5e-05	0.000351	0.001152	0.006024				0.000396
48	CRI	Costa Rica					0.004687			10.5878	0.594398	0.042691	30.4187	16.0207	25.8227	129.357	130.283	202.573	72.7992	76.728	124.111	245.104	243.176	250.436	210.384	206.411	200.296	301.488	315.506	346.325	301.298	293.287	284.6	345.672	210.081
49	CUB	Cuba										125.903	56.66	618.871	634.273	536.047	465.135	632.642	638.38												8.776
50	DOM	Dominican Republic														0.013636		0.0025	8.59286	103.226	95.6903	100.227	32.0673	34.6289	115.584	91.7324	0.005313	34.3519	16.0602	39.6816	5e-05	0.042513	48.1694	7.5
51	ECU	Ecuador					0.001062										5.46941		0.000423		0.0007	0.000358	0.1118					0.38449		4e-05	111.523	0	383.387	643.26	513.005
52	SLV	El Salvador											2.70383	22.6281	46.0542	36.966	120.068	51.9666	122.139	173.141	169.445		7.05901	2.52326	55.9193	73.0258	90.9139	128.269	96.4425	115.324	35.9517	27.9397	36.6096	43.4556	111.624
53	GUF	French Guiana
54	GLP	Guadeloupe
55	GTM	Guatemala				0.036457			0.003875		0.001625	8.372	0.021025	0.003505		0.11275	0.049228	0.026	0.0039		0.080895		0.000185		0.008861	0.02349	0.0005		0.01305	54.171	4.5e-05	1.855	42.7891	58.364	67.1639	57.239
56	GUY	Guyana																					4.2e-05
57	HTI	Haiti
58	HND	Honduras									6.53319				1.1663	11.3391	9.29359	31.0383	14.3276	6.24878		0.001275	24.9		195.35		132.254	104.473		1.2e-05	28.2751		8.76654	0
59	JAM	Jamaica																				61.2916					113.309	152.479	39.4396	33.4673		0	0.0001
60	MTQ	Martinique
61	NIC	Nicaragua					0.085				0.993382						1		0.85094		5e-06			5e-06			5.3e-05	2.3e-05		1e-05	1.77005	0.000548	1.07511	6e-06	6e-06	2e-06
62	PAN	Panama												47.8					0.00684	0.00033		0.00026												101.441	60.255
63	PRY	Paraguay															2.5	4.896
64	PER	Peru			0.750292		17.9558		0.840223			45.805	20.539	128.553	185.692	244.812	127.158	308.06	224.795	362.581	336.293	8.16022	0.002733	0.000266	6e-06	0.00206	0.02338	0.000182		0.000139	928.344	0.0004	272.36	706.891	452.519
65	SUR	Suriname																				0.0045		0.002975						0.000134
66	TTO	Trinidad and Tobago		15.8	22.451	20.2592	3.60763		19.7665	10.5824			4.58454	6.5		0.000285	0.001167	0.0009	0.01837	0.002204	0.00036	0.00055	0.00025	0.00319	0.00057	0.258024	0.0844		0.270412	0.425406	0.706752	0.468098	0
67	URY	Uruguay								0.3	18.0123	45.3682	43.3882	2.7369														9.05205		0.000263			15	1	6.7975	11.577
68	VEN	Venezuela					980.494	727.507	1390.56	1257.98	1095.39	893.228	731.646	677.25	846.824	1012.15	1254.37	784.142	121.58		205.42	151.78	200.8	126.46	82.7	124.9
69	ALB	Albania								0.000296	0.024		0.034			0.07416	0.0002	0.006		120.134	44.7754	12.7157	87.5895	23.341		18.066			4.67774
70	BIH	Bosnia and Herzegovina															2.5e-05		13.734	0.000174		2e-05		0.003	1.4e-05		2.5e-05			5.07546	24.9932	26.2987	1.55327	24.7483	54.2532	41.3446
71	ISL	Iceland									1.4e-05	0.000101	3e-05				0.004419			0.607	0.000113	0.001345	0.046898	0.007499	0.002229
72	MKD	North Macedonia								0.211	0.270437			251.748	179.321	16.3563	16.7624	129.57	151.663	90.8687	173.089	5.6377		0.000216	154.117	20.1178		31.7343	45.0516	1.34688	66.9249	53.4577	31.9538	79.6413	42.5855	68.8901
73	SRB	Serbia																	363.068	357.633	385.154	66.3094				0.000298	0.0002	4.6e-05		16.4648	55.4572	3e-05	33.2628	0.00027	0.000126	4.98697
74	RUS	Russia							468.409	102.857	45.3368	595.726	670.795	609.891	397.242	370.991	595.16	744.755	420.46	211.723	32.0468	1461.86	1917.43	906.293	1296.01	1194.52	693.033	359.052	305.385	765.995	770.058	12.2561	3.8927	0.037231
75	UKR	Ukraine							46.768	402.166	743.732	542.05	369.663	73.3711	57.998	38.2177	3.11	77.4648	81.0888	5e-06	14.689	7.4993	63.5088	27.6563	21.6462	1.38481	0.002677		9.1e-05		9.8358	42.7478	0.000123	0.026433		69.492
76	BLR	Belarus									0.639125	0.90153	55.4727	5.7228	0.047	1.6484	22.5163			0.025			0.0447					0.21		2.77423
77	EST	Estonia						231.887	246.47	277.978	364.048	281.049	345.554	277.012	163.887	157.353	113.105	97.4423	30.6981	15.7772	203.785	0.000475	222.19	426.994	347.754	346.684	363.908	40.4705	0.000514	93.3242	0.001928	151.721
78	LVA	Latvia					1.03175	12.3794	3.37472	0.005			0.00063		1e-05	7.5e-05		0.18417	0.32602	35.307		2.38169	68.8019	201.05	163.102	26.9294	2.01883	0.813669	0.025135	0.00057	0.0012		19.8187	12.308		22.1205
79	LTU	Lithuania					432.3	0.099023	0.084679	0.210601	19.1702	1.96652	0.0003		0.00224				0.00084	0.55992	0.129552	39.8775	0.01378	0.097495	0.018881	0.004106	0.005605	3.36481			0.0004	2.63572	0.001125	5.30978	1.49038
80	GEO	Georgia								3.44		1.28281	1.88294	8.9645	2.74511	2.8465	68.6695		82.543	244.318	64.1554	81.7842			7.2e-05		15.8659			6.06653	10.1828	11.1937		5.5e-05	4e-05	12.0526
81	AZE	Azerbaijan																	0.065				0.000115					91.0841	0.386	211.335	268.235	433.844	383.256	623.026	715.198	814.804
82	ARM	Armenia								26.6135		38.871	22.47	0.975	0.975	6.284	64.869	81.3984	89.4738	112.593	29.218			0.483	15.406	86.9135	3.0618	0.0221	5e-06		2e-05			5e-05
83	KAZ	Kazakhstan									0.0085			21.431	51.282		0.956			0.014	122.31	19.831	2.5e-05	6e-05	0.0347	16.9333	90.1411	1.37751	7e-06		2e-06	6.5989	3e-05	3.0797	2.41615
84	KGZ	Kyrgyzstan																	0.064	3.6285						0.39359				0.13831	0.94679	5.21142	7.12747
85	TJK	Tajikistan																											0.065				5.26617
86	UZB	Uzbekistan																														0.128
87	TKM	Turkmenistan
88	MDA	Moldova					0.012					4e-05				43.625	6.081				0.735				0.00032		2.4312						4e-05			1e-06
89	DZA	Algeria			60.8636								4.5e-05		3.1e-05	5e-05	0.000149	0.000245	134.008	117.812	177.649	27.9268		0.0065	0.00015	0.00056			0.0001
90	AGO	Angola																												74.1		41.0087	200.052	28.205	14.6804
91	BEN	Benin																								15	123	155.35	71.004	166.467	150	220	171	15	3.4e-05	0.000163
92	BWA	Botswana											0.09195	0.00205	0.010605			0.001	0.01245	0.00956	0.030216	0.0047	0.00489	0.04427	0.0003	4.8e-05	4.5e-05	0.0012	0.000337	0.03948	0.00077				0.002363	0.002115
93	BFA	Burkina Faso													0.0294																	4.9e-05	0.0002
94	BDI	Burundi																										0.0005	0.0043	0.0004
95	CMR	Cameroon							10.3415	0.020597			0.006667			0.0065	0.0003		0.099	0.0157	0.0255	0.000125	2.8e-05		0.35	5e-05	0.35245	0.609917	0.9	0.00059		0.870092	0.88733
96	TCD	Chad
97	COG	Congo (Brazzaville)																							0.2955					0.6	58.067	114	26.341	0.009592
98	COD	Congo (Kinshasa)																																	0.06
99	CIV	Côte d'Ivoire						14.5		12	0.001031	0.001219	0.073646			0.25	0.030484			9e-05	0.0065	9.6e-05		9e-05		0.0026	0.7215		8.68302	3.00006	0.135955	3.198	5.24957	64.7034	0.000239
100	DJI	Djibouti																				37.9493
101	ERI	Eritrea
102	ETH	Ethiopia						0.29		0.03		0.054199														0.48	5.165	7.8864	3.77506	18.3335	83.705	32.0512	19.9791
103	GAB	Gabon							0.356312					0.500128		0.000108						6.3e-05	0.00279	0.000104	1.7e-05	0.004041						0.00016
104	GHA	Ghana							0.003			0.1425	931.215	0.54815		0.031066		0.056145			0.000367					0.117235	0.01725	0.000211	40.02
105	GIN	Guinea
106	KEN	Kenya			19.5892					1.99865	3.29065	0.466901	47.4155	70.7231	41.1014	77.8456	36.2738	4.75694	18.7529	59.8487	74.2252	28.1056	2.81274			80.6854		100.494	62.1277	73.6022	97.1115	91.1696	276.148	1565.92	945.128
107	LBR	Liberia
108	LBY	Libya
109	MDG	Madagascar						0.003																											6e-05
110	MWI	Malawi										4e-06	5e-05	0.021334	0.020686						0.02707					5.2e-05					5e-05	0.0001			0.000101
111	MLI	Mali																													0.0168
112	MRT	Mauritania																															0.6
113	MAR	Morocco				9.6e-05	225.63	418.07	197.089	205.221	195.459	267.05	367.658	204.547	217.83	128.935	22.7333	130.062	60.3815	9.90502	0.002699	0	15.9669	47.4571	198.501	898.933		1638.81	1518.05	1964.99	1507.3	1134.72	1271.79	1382.06	1562.63
114	MOZ	Mozambique											2.48903					0.409602		35.5698							1e-06					0.009		5.658	11.0401
115	NAM	Namibia											0.004822	1.7e-05	0.026073	0.040205	0.076029	0.889654	0.25677	0.182438	0.061211	0.029606	0.05236	0.001884	0.005666	0.112189	0.093636	0.00102	0.043465	2.9e-05	0	0	10.5351	5.59649	23.8074	18.3116
116	NER	Niger													0.55636	0.31182	3.5728	2.12708	1.40304	0.60096				1.14377		0.03			0.002		0.02
117	NGA	Nigeria												0.75		1.19263				24.7988	125.167	15.0686	7.57515	0.19	1		24.6396	61.1086	5.97207	9.24387			0	144.256	79.493	250.62
118	REU	Reunion
119	RWA	Rwanda																	0.022	0.05	0.004			0.015		0.69025	0.729025	0.1726		3.585	0.1497	0.005	2.2865	9.497	6.29966
120	SEN	Senegal								0.03		0.01	17.858	0.075			0.00565	0.068	0.002613	0.0014	0.2	5.85			0.15	62.2837	324.482	0.1	0.0575	0.000204		30.164	235.5	249.538	20
121	SLE	Sierra Leone
122	SDN	Sudan																			1		0.000175
123	TZA	Tanzania								54.844	16.4395	46.2414	29.6535	12.9019	4.40637	27.6032	8.98009	9.83156	0.052	1.63925	0.112066	3.23384	1.68415	1.84825	0.24255	1.24367	7.96552	40.9088	131.854	85.1399		18.0467	0	63.2672	5.64	31.4665
124	TGO	Togo					49.8531	55.0281	33.7839	79.173	268.046	333.179	181.858	176.804	153.103	1566.45	712.858	1060.21		1128.77	3.8214	1054.72	1000.75	902.354	1005.72	1030	633.498	577.719	740.264	1326.4	1307.3	1324.83	1207.97	972.808	867.282	708.792
125	TUN	Tunisia		597.239	777.344	483.528	424.752	527.756	605.753	964.697	564.511	277.075	17.9067	27.3277	1.416	68.742	127.291	69.4725	18.185	35.372	6.00344			12.447	6.5	8.56808	1.3e-05	5.00002	45	349.856	1371.94	736.344	320.963	589.168	812.2
126	UGA	Uganda					0.1175	0.0525		0.035199	0.164636	0.0055			0.07	0.418635	0.439058	0.105	0.4425	3.19385	0.89575	1.2654	3.3862	0.200559	1.40563	0.347776	0.11033	1.302	1.06936	0.000145	0.935759	0.3518	0.21995	0.81615
127	ZMB	Zambia						7.1376		41.9473	31.9505	56.5477	0.32841	3	0	7.15505	0.015		0.948522	0.167556	0.0199	43.1148	147.824	52.4397	0.031374	2.64248		3.1e-05	74.9262	39.8397	62.371	20.3678	100.179	0.034	150.653	250.463
128	ZWE	Zimbabwe						43.9762						0.252726	1.794	157.518	182.616	160.607	213.331	164.898	62.118	0.22092	45.3656	50.3812	0.174	22.645	19.2676	29.8232	2.52002	8.36602	27.0161	0.000165	0.000127		4e-06
129	AFG	Afghanistan
130	BHR	Bahrain																				0.005								0.002772		0.0002
131	IRQ	Iraq
132	ISR	Israel														11.4884	411.239	505.195	725.552	366.445	469.884	38.705	6.46512							4.33854
133	JOR	Jordan									142.106	183.568	96.051		4.98644									0.252	250.078	410.773	251.551	60.6714		0.004432	0.9453	0.10606			9.73119
134	XKX	Kosovo
135	KWT	Kuwait																								5.1e-05	0.8	0.08		0.0434	0.069825	0.99	0.084
136	LBN	Lebanon									21.0617	296.326	706.126	622.091	642.454	613.703	223.835	215.227	172.431	170.987	217.657	24.6	94.0844	142.198	103.722	155.497	106.411	35.75	20.4037	12.8508	20.3501	34	179.857
137	OMN	Oman							2.03131	2.5174	7.96333		0.21611					0.58675			0.129919		267.623	0.13215	2.40481	0.6655	0.182361	0.307645		0.00065		0	0	135.45	50.3892
138	PSE	Palestine																													1.04326				18.7961
139	QAT	Qatar													0.615	0.06
140	SYR	Syria																	0.000958				5.00315
141	ARE	United Arab Emiratese		0.012														11.4946		305.088	73.9799				1907.1		4169.25	3052.32	2546.93	0	4131.18	0	0	0
142	YEM	Yemen																	0.002588					0.075			0.006954
143	BGD	Bangladesh														0.4825						0.000475		0.000125		0.000116
144	BTN	Bhutan				2.136	0.849562					0.015						2.00275	0.081	0.02514		7.06588	5.94895	11.5824	28.8084
145	MMR	Burma																													0.003492	0.6
146	NPL	Nepal																								6e-05									3.671
147	PAK	Pakistan															20	12	91.14	730.801	1667.46	518.729	316.957	213.199	57.57	3.312	7.498	0.825	1.08	11.04	1684.07	2531.32	3986.37	3709.5	1341.58
148	LKA	Sri Lanka				6e-06										0.00025	0.000234	5e-05							0.0001	0.004688	0.008349	0.0005	0.066648	0.059369		0.00184		0.004325	0.00185
149	HKG	Hong Kong				539.476	706.27	515.298	350.598	105.846	221.394	402.676	277.506	270.559	142.318	243.76	202.594	418.54	318.97	161.2	126.982	148.023	246.046	359.599	444.625	393.976	375.629	307.304	259.25	198.47	223.755	164.29	173.09	235.431	148.58
150	PRK	Korea, North
151	MNG	Mongolia								0.01
152	TWN	Taiwan
153	BRN	Brunei																	3.4e-05	0.005528			0.000363	0.017409	0.448157	0.000111	6.9e-05	0.000163	6.1e-05	5.4e-05	0.001		0.054	4.9e-05		0.0002
154	KHM	Cambodia
155	LAO	Laos																						0.041053		0.082535					0.147229	3.71703	39.5244	64.3616
156	MYS	Malaysia	1143.57	508.173	5.17	7.5	152.766	0.004	0.064429	0.02	636.797	472.619	236.013	200.488	828.628	0.95723	1008.24	872.11	953.803	1395.52	1076.96	103.464	1087.7	987.842	708.376	779.503	589.143	203.625	213.64	875.028	0.03	1650.09	558.529	697.711	157.184	63.4837
157	PHL	Philippines								3.8e-05	0.00803	0.000128		0.0007	156.602	725.056	312.991	838.626	653.059	809.481	308.652	111.34	335.579	381.52	0.003795	0.06	0.12707	0.085756		0.5574	0.64035	0.294633	5.03192	4.89599	3.09231	4.05244
158	SGP	Singapore	0.541207	0.049097	0.449761	1.08637	0.688625	0.093	0.009	0.048773		0.12	2.026	8.7242	0.00995	3.08121	5.38976	11.4891	0.307709	0.889207	0.889361	1.39395	0.503553	0.992144	1.8309	5.00991	1.90899	0.159729	2.31014	1.15462	0.27548		0.993185	0.36613	0.44686
159	THA	Thailand	5.22312	1.24419	12.1358	1452.32	1562.98	2337.38	2354.43	4763.42	7207.18	8933.19	8367.89	9988.09	9268.66	7245.02	7120.89	9455.25	7861.2	13994.1	11178.1	10060.4	8494.01	6515.12	6082	2446.39	3621.54	3945.67	6099.96		9830.4	9158.92	0	7310.53	4789.93
160	NZL	New Zealand	132.143	170.849	135.061	77.687	27.37	22.193	0.006		0.8685					0.000313				0.01453					0.015	0.001217		0.129	0.055628	0.101772	1.16707	0.005	0.014		0.516
161	FJI	Fiji													0.7244	0.4701	0.08675	0.53524	0.8255	1.29584	1.25682	0.73692	0.51911	0.069	0.992072	0.1832	0.030125	0.296588	0.131882	0.691417	52.4437	0.1116	0.041286	0.071604	0.03575
162	NCL	New Caledonia											0.000199													0.000104
163	PNG	Papua New Guineae											2.20112											11	0.012
Clinker trade: UN Comtrade Database. https://comtradeplus.un.org/. (last accessed: 2 June 2024).

## Sheet: SI data5
SI data 5. Clinker production for 163 countries and regions, 1928-2024
unit: kiloton (kt)
code	ISO	countries and regions	1928	1929	1930	1931	1932	1933	1934	1935	1936	1937	1938	1939	1940	1941	1942	1943	1944	1945	1946	1947	1948	1949	1950	1951	1952	1953	1954	1955	1956	1957	1958	1959	1960	1961	1962	1963	1964	1965	1966	1967	1968	1969	1970	1971	1972	1973	1974
1	AUS	Australia	727.7	684	672.6	376.2	238.45	309.7	396.15	531.05	623.2	693.5	819.412	837.689	835.05	370.662	321.05	334.293	298.277	669.18	697.68	851.58	978.12	995.22	1118.34	1174.2	1289.15	1518.18	1818.25	1891.49	2028.24	2205.98	2336.09	2484.34	2652.36	2714.1	2786.36	2963.13	3444.67	3611.88	3490.36	3626.14	3731.62	4094.56	4283.26	4349.46	4477.3	4647.43	5283.36
2	AUT	Austria	496.85	552.9	571.9	475	333.45	266	299.25	352.45	350.55	404.7	617.5	665	712.5	799.9	647.9	734.35	427.5	380	368.296	267.207	685.31	1036.46	1216.38	1401.2	1331.9	1324.24	1540.87	1766.08	1839.16	2022.57	2046.39	2296.23	2688.5	2929.75	2904.15	3146.38	3580.61	3841.8	4276.03	4320.58	4325.44	4330.14	4565.02	5215.57	6026.38	5945.39	6111.68
3	BEL	Belgium	2893.7	3085.6	2897.5	2897.5	1995	1852.5	1805	2090	2232.5	2857.62	2901.44	2424.17	2424.17	599.051	485.137	436.544	570	614.553	1795.29	2478.72	3164.4	2778.75	3379.37	4175.25	3905.47	4394.79	4156.29	4454.58	4430.76	4469.81	3854.11	4217.05	4168.6	4514.37	4557.47	4473.54	5553.76	5609.82	5506.29	5528.97	5453.14	5955.59	6390.86	6523.4	6615.24	6505.62	6836.2
4	BGR	Bulgaria	102.6	143.45	165.3	98.8	132.05	114.95	123.5	117.8	115.9	128.25	171	171	171	119.742	119.742	119.742	119.742	232.845	237.5	285	308.75	427.5	522.5	603.223	640.326	665.927	740.945	771.405	816.125	836.054	887.254	1361.34	1505.71	1661.58	1798.33	2094.83	2500.71	2547.05	2713.29	3190.13	3340.33	3374.51	3483.65	3637.37	3625.7	3824.15	3885.3
5	CAN	Canada	1671.05	1847.75	1778.4	1538.05	700.15	363.85	525.35	526.3	744.8	926.469	832.383	864.381	1140.14	1262.16	1376.38	1101.32	1084.52	1277.69	1743.54	1800.21	2130.63	2400.52	2514.47	2565.03	2793	3353.45	3383.91	3796.27	4328.2	5213.67	5302.95	5416.04	4987.48	5348.48	5817.86	6045.84	6817.24	7199.14	7749.21	6802.01	7037.76	7109.86	6845.81	7805.25	8610.83	9562.9	9821.18
6	HRV	Croatia	0	0	0	0	0	0	0	0	0	0	0	0	0	0	0	0	0	0	0	0	0	0	0	0	0	0	0	0	0	0	0	0	0	0	0	0	0	0	0	0	0	0	0	0	0	0	0
7	CYP	Cyprus	0	0	0	0	0	0	0	0	0	0	0	0	0	0	0	0	0	0	0	0	0	0	0	0	0	0	0	0	0	0	78.9066	78.9066	83.6054	88.3041	90.2484	91.2206	66.4306	93.1649	93.975	177.58	226.026	230.887	252.463	287.791	401.529	428.24	321.395
8	CZE	Czechia	0	0	0	0	1026.95	807.5	864.5	931	997.5	1292	1292	1292	1292	285	304	332.5	332.5	617.5	874	1333.8	1567.5	1651.1	1781.25	1976.07	2099.53	2204.04	2433.95	2747.47	2990.67	3488.42	3904.5	4465.11	4798.56	5075.95	5557.49	4919.11	5218.37	5427.38	5823.54	5897.74	6275.23	6652.72	7030.2	7352.98	7225.11	7316.26	7598.31
9	DNK	Denmark	740.05	759.05	740.05	483.55	394.25	526.3	731.5	719.15	752.751	642.319	607.959	661.2	418.95	400.08	413.027	607.086	614.495	208.996	476.743	601.882	730.611	792.3	829.35	935.7	1151.36	1197.05	1160.92	1196.08	1126.73	1106.8	1014.61	1320.51	1369.93	1504.73	1546.54	1444.95	1803.19	1895.7	1992.92	2090.13	2164.18	2476.73	2472.94	2562.64	2543.39	2636.42	2244.73
10	FIN	Finland	266	264.1	192.85	153.9	146.3	154.85	228.95	269.8	315.929	389.852	451.404	534.85	534.85	291.733	169.862	226.365	171.21	263.795	313.302	396.85	528.01	623.185	705.85	787.608	739.162	890.17	988.034	1003.26	912.044	898.758	878.829	1111.5	1190.4	1274.01	1289.08	1356.64	1493.39	1681.5	1479.13	1438.3	1402.17	1671.14	1780.17	1720.15	1885.07	1987.99	2093.52
11	FRA	France	4028	5497.65	4739.55	4739.55	4939.05	4527.7	4482.1	3831.35	141.55	222.906	253.048	290.51	264.575	3235.47	2371.79	2779.94	1411.28	1447.8	3203.4	3662.25	5110.05	6120.85	6847.6	7718.75	8212.77	8845.48	9258.81	10094.7	10625.8	11852.4	12743.3	13299.1	13464.5	14753.6	15865.1	17227.4	20460.3	21246.9	22138.9	23370.1	24123.7	26166.4	27553.8	27376.1	28518.5	28791.8	30304.6
12	DEU	Germany	7197.2	6687.05	5235.45	3532.1	2743.6	3734.45	6293.75	8361.9	10953.5	11974.8	14250	14250	12681.5	10781.5	6922.65	8619.35	2465.82	2402.55	2402.55	2846.39	5302.14	8037	10333.1	13154.2	14132.5	17205.5	18229.7	20921.9	22094.3	21910	22079.1	26000.6	28440.2	30798.2	32326.8	32941.5	37429.4	38209.3	39129.7	36760.9	38944.9	40364.2	43987.2	46546.8	48102.4	46626.5	42061.4
13	GRC	Greece	137.75	147.25	171	185.25	186.2	190	235.6	259.35	263.007	275.5	292.6	292.6	292.6	59.85	28.5	0	0	52.25	97.85	172.9	273.6	309.7	410.4	411.384	566.281	708.701	811.264	1072.61	1176.15	1163.83	1273.04	1371.87	1555.12	1745.18	1762.03	2179.25	2538.46	3051.43	3408.7	3277.46	3875.17	4598.13	4604.66	5233.68	5639.25	6070.77	6538.72
14	HUN	Hungary	404.7	382.85	312.55	281.2	187.15	171.95	213.75	266	204.25	372.4	375.25	375.25	375.25	635.864	691.78	666.226	145.625	36.366	155.411	198.607	137.75	608	760	900.864	1025.62	1006.99	915.933	1116.2	945.259	939.588	1236.91	1361.34	1492.42	1521.91	1641.65	1708.08	2144.09	2263.83	2470.9	2523.23	2660.95	2435.9	2632.34	2555.74	2771.88	3159.45	3164.75
15	IRL	Ireland	0	0	0	0	0	0	0	0	0	0	104.5	247.95	258.4	279.3	191.9	239.381	211.389	182.4	285	276.45	378.1	430.35	421.8	404.741	436.984	447.035	566.007	635.629	677.765	495.93	494.989	502.604	541.491	735.274	860.682	761.036	924.358	999.376	1057.38	1233.18	1284.38	1209.36	815.983	1430.83	1427.85	1502.89	1599.1
16	ITA	Italy	2923.15	3322.15	3307.9	2923.15	2968.75	3376.3	3887.4	3986.2	3666.05	4141.16	4377.08	4560	2653.87	2653.87	2131.15	1626.58	1282.46	1085.92	1918.05	2650.59	2986.62	3834.68	4753.37	5299.06	6319.5	0	0	0	0	0	12181.9	13682	15213.4	17129.5	19149.4	20983.8	21698.2	19660.4	21255.4	24958.6	27992.2	29923.6	31415.8	29985.9	31331.6	33764.5	33520.4
17	LUX	Luxembourg	0	0	0	0	0	0	0	0	0	0	0	0	0	0	0	0	0	47.5	71.345	84.8084	96.9	114.95	118.75	125.408	98.5118	139.666	143.393	149.226	154.897	154.897	186.168	182.441	199.454	219.383	218.573	192.811	194.755	210.958	201.398	173.854	181.469	196.699	232.645	249.017	293.823	339.49	371.371
18	NLD	Netherlands	0	0	0	0	241.3	342	374.3	342	380.95	418.95	433.2	513.95	513.95	437.95	351.5	340.1	203.3	219.45	382.521	493.299	559.547	524.43	563.16	666.899	772.378	817.907	811.588	1045.88	1193.16	1254.08	1297.67	1519.97	1708.08	1807.89	1914.34	1977.04	2729.33	2824.44	3004.93	3181.54	3264.34	3131.31	3637.89	3691.75	3522.34	3417.68	3274.87
19	NOR	Norway	302.1	303.05	304.95	209	223.25	210.9	236.55	249.85	275.5	304.457	315.02	370.5	218.5	297.188	354.966	295.594	305.644	134.71	414.4	448.981	499.878	562.575	554.04	666.899	670.625	717.289	731.547	760.064	870.241	939.588	979.447	1074.39	1093.51	1166.59	1341.41	1366.04	1463.9	1522.88	1735.62	1962.78	2182.17	2367.36	2478.11	2578.47	2502.55	2569.79	2480.56
20	POL	Poland	1043.1	957.6	790.4	518.7	336.3	390.45	684.95	800.85	995.6	1224.65	1633.48	1633.48	1235	285.861	285.861	285.861	285.861	285.861	1328.97	1445.73	1732.66	2090	2257.2	2553.69	2526.96	3129.37	3232.9	3622.41	3833.21	4263.55	4805.2	5051.16	6262.46	6995.79	7166.89	7290.36	8322.95	9094.35	9538.95	10581.1	11020.2	11238.8	11568.5	12201.2	12805.6	13969.9	14776.2
21	PRT	Portugal	72.2	83.6	94.05	90.25	114.95	155.8	175.75	203.3	232.75	241.3	254.6	282.15	257.614	258.4	231.42	234.459	232.725	249.831	310.08	406.347	473.166	495.363	543.922	609.866	690.716	730.575	758.443	740.134	972.804	903.457	972.804	979.447	1138.07	1182.79	1332.66	1361.34	1540.87	1595.96	1634.03	1744.21	1768.03	1934.27	2215.3	2334.21	2654.74	3135.54	3129.51
22	ROU	Romania	315.4	301.15	376.2	186.2	202.35	209	298.3	342.95	357.2	433.495	425.982	504.45	380	589.494	532.946	798.461	380	237.5	299.25	400.9	429.4	532	617.5	1082.98	1425.02	1801.24	1600.98	1891.49	2076.69	2299.96	2443.35	2708.43	2901.4	3142.65	3314.56	4150.62	4514.37	5135.74	5591.68	6021.21	6674.82	7139.35	7718.66	7965.69	8469.24	8905.11	9952.32
23	SVK	Slovakia	0	0	0	0	0	0	0	0	0	0	0	0	0	0	0	0	0	0	0	0	0	0	0	0	0	0	0	0	0	0	0	0	0	0	0	0	0	0	0	0	0	0	0	0	0	0	0
24	SVN	Slovenia	0	0	0	0	0	0	0	0	0	0	0	0	0	0	0	0	0	0	0	0	0	0	0	0	0	0	0	0	0	0	0	0	0	0	0	0	0	0	0	0	0	0	0	0	0	0	0
25	ESP	Spain	1464.9	1729	1747.05	1548.5	1353.75	1336.65	1293.9	1287.25	570	617.5	562.806	1134.76	1479.98	1557.93	1563.97	1616.44	1750.89	1829.75	2037.88	2077.02	2214.31	2135.23	2395.05	2604.89	2813.9	3093.24	3621.44	4115.46	4184.81	4650.31	5059.75	5490.09	5511.96	6296.65	6121.83	7360.68	8075.05	8758.15	11216.7	12444.1	14206.6	14985.6	15863.8	16121.1	18420.1	21168.5	22368.4
26	SWE	Sweden	444.6	541.5	580.45	492.1	459.8	382.85	553.85	703	755.422	831.764	943.285	1125.74	665.712	612.772	782.696	876.597	1008.08	1152.84	1388.64	1472.6	1412.13	1613.45	1846.8	1933.29	2010.26	2234.34	2341.76	2422.45	2370.28	2323.78	2384.54	2679.1	2665.65	2861.38	2901.4	3134.07	3444.67	3586.28	3506.4	3645.26	3716.39	3760.14	3868.81	3642.31	3561.87	4031.23	3173.52
27	CHE	Switzerland	598.5	655.5	750.5	807.5	0	0	0	0	483.55	617.5	617.5	617.5	617.5	675.45	417.05	348.65	408.5	394.25	659.3	945.051	950	902.5	1024.1	1249.22	1314.84	1501.98	1726.22	2011.23	2261.07	2257.18	2075.71	2548.83	2884.22	3421.02	3539.78	3401.9	4105.9	3837.1	4109.79	3967.2	4105.09	4307.3	4556.41	4940.59	5387.85	5409.79	4922.54
28	GBR	United Kingdom	4180	4527.7	4855.45	5686.7	4104	4246.5	5016	5605	6365	6935	7505	8455	6840	7099.3	7171.11	6727.78	4513.6	3915.05	6347.47	6718.12	8223.86	8895.8	9416.97	9869	10748.3	10830.1	11548.2	12084.1	12323.5	11548.2	11258.5	12150.6	12822.2	13657.3	13543.3	13357.1	16117.9	16331.6	15912.6	16698.2	16979.7	16551.1	16200.7	16991.3	17128.6	18961.4	16862.7
29	USA	USA	29631	28821	27457	20775	12792	10738	13261	12847	19123	19927	17757.2	20742.4	22195.8	27907	30915.3	23142.4	15436.3	17516.1	28162.4	31995.7	35396.8	36109	38678.5	42361	42774.1	45206	46377.8	51092.8	54564.8	51903.4	53349.5	58108.3	55348.7	55157.8	57425.1	60416.9	63473.9	63991	66447	64566	67883	68608	67122.6	68248.2	70196.5	70952.9	70740.1
30	MEX	Mexico	205.2	213.75	0	0	239.068	239.068	239.068	239.068	271.679	327.458	355.026	389.295	460.742	510.591	559.052	549.34	629.66	703.38	701.1	672.41	791.772	1166.22	1446.66	1534.22	1558.04	1583.64	1662.55	1914.34	2163.21	2432.01	2412.08	2573.62	2934.61	2884.22	3184.46	3573.97	4197.12	4088.89	4661.65	5945.22	5819.81	6447.82	6819.96	6934.71	8035.62	9065.86	9731.76
31	BRA	Brazil	83.6	91.2	82.65	158.65	141.55	210.9	307.8	344.85	458.85	542.879	587.001	662.903	706.452	729.131	716.141	710.039	769.413	735.659	785.063	867.849	1055.93	1216.99	1312.88	1383.22	1538.11	1928.43	2374.98	2632.44	3128.4	3207.3	3600.54	3648.99	4250.26	4473.54	4818.49	4924.78	5342.8	5298.25	5743.82	6084.72	6917.05	7431.97	7740.14	8428.9	9785.35	11520.1	12828.2
32	EGY	Egypt	85.5	171	285	228	230.85	273.6	282.15	360.05	318.25	313.5	356.975	353.344	342.79	399.102	399.931	306.716	402.707	410.484	558.198	615.935	729.869	760	950	1073.58	899.73	1042.15	1268.34	1302.53	1283.41	1392.77	1437.33	1688.15	1759.44	2029.21	2042.5	2383.56	2394.91	2300.93	2497.63	2599.22	2989.7	3432.36	3499.16	3712.29	3493.33	3402.85	3061.06
33	TUR	Türkiye	56.05	61.75	54.15	95	102.6	112.1	160.075	124.616	168.631	204.054	254.19	269.443	253.305	259.273	200.312	143.898	271.082	274.032	307.058	332.933	327.678	353.955	367.472	376.224	436.012	501.632	672.57	779.993	921.441	1198.02	1441.22	1647.32	1936.05	1926.65	2203.07	2563.09	2793	3161.61	3671.83	4036.55	4491.68	5506.29	6052.23	7127.2	7908.15	8348.38	9493.98
34	IRN	Iran	0	0	0	0	0	0	0	0	52.25	52.25	52.25	161.5	52.25	52.25	52.25	33.25	36.1	23.75	40.565	40.5783	61.5553	55.575	60.8	61.7319	66.4306	61.7319	58.9774	75.9902	148.254	132.051	389.51	550.078	757.147	707.729	707.729	707.729	707.729	745.481	1323.91	1324.4	1843.04	2224.94	2445.36	2701.6	2737.09	3292.98	3673.89
35	SAU	Saudi Arabia	0	0	0	0	0	0	0	0	0	0	0	0	0	0	0	0	0	0	0	0	0	0	0	0	0	0	0	0	0	0	2595.49	0	0	99.808	144.365	186.168	246.117	240.284	237.53	336.366	485.43	530.149	641.068	667.146	879.797	913.33	965.682
36	IND	India	539.6	541.5	688.652	558.6	562.4	591.85	728.65	847.4	928.15	1084.9	1322.4	1559.9	1797.4	2034.9	2109	2038.7	1973.15	2071	1870.55	1397.45	1499.1	2029.2	2519.4	3089.4	3414.3	3648	4216.14	4331.18	4756.83	5405.59	5888.28	6575.11	7452.99	7832.94	8157.81	8887.42	9205.65	10049.3	10498.5	11109	11343.5	12597.4	12866.2	14087.2	14836.6	14067.4	13330.8
37	CHN	China	239.4	350.55	429.033	453.799	182.4	256.5	217.55	192.85	427.5	760	782.8	1273	1379.88	1129.64	1493.4	1461.33	1119	403.75	197.654	578.257	726.75	1157.1	408.5	1231.4	1944.31	3686.09	4370	4275.05	6100.92	6466.62	8835.11	11656.6	12825.2	9500.07	8550.11	9500.07	9975.13	10546.9	10571.7	7741.44	8792.5	9737.76	9719.41	11442.1	13059	22556.2	22159.3
38	KOR	South Korea	0	0	0	0	0	0	0	0	0	0	0	0	0	1240.68	1122.36	1330	952.852	5.0825	10.1612	17.2814	16.4825	22.9254	9.5	6.64306	34.1875	41.8027	58.9774	53.1445	43.747	87.332	281.277	340.092	409.439	496.933	750.504	739.162	1179.87	1533.25	1786.01	2317.94	3393.47	4621.79	5530.07	6515.11	6225.91	7721.88	8337.29
39	JPN	Japan	3648.95	4060.3	3560.6	3434.25	3544.45	4544.8	4868.75	5582.96	5920.6	6368.16	5243.05	4820.3	4037.5	5537.04	4138.22	3579.28	2845.3	1113.66	882.55	1174.2	1755.6	3110.84	4235.1	6220.66	6761.18	8329.59	10141.4	10034.9	12372.9	14417.2	14235.9	16404.6	21411.2	23404.3	27347.9	28450.8	31332.1	31054.7	36352	40843.7	45293.9	48818.4	54318.4	56419.1	57472.2	73962.3	69146.2
40	VNM	Vietnam	0	0	0	0	0	0	0	0	0	0	0	0	0	0	0	0	0	0	0	0	0	0	0	0	0	276.416	241.257	285.004	332.477	332.477	286.948	360.994	385.622	430.341	446.543	466.473	687.8	897.624	840.752	879.801	607.597	704.489	745.327	721.405	461.374	718.35	654.741
41	IDN	Indonesia	0	0	0	0	0	0	0	0	0	0	0	0	0	285	0	0	0	0	0	9.5	35.8635	0	0	95.5953	130.107	141.611	139.666	141.611	99.808	142.421	284.031	326.806	367.637	422.726	485.43	313.52	417.055	346.735	321.135	285.166	389.51	512.974	525.606	519.575	525.606	693.628	789.271
42	ZAF	South Africa	0	0	0	0	0	0	0	0	0	0	0	0	0	0	0	0	0	0	0	0	0	0	0	0	0	2016.9	2053.84	2219.27	2346.46	2398.79	2585.93	2514.64	2569.73	2468.14	2526.15	2739.86	3282.32	3687.87	3784.76	3619.5	4189.5	4737.8	5462	5544.39	5768.27	6457.48	6846.96
43	ARG	Argentina	221.35	332.5	364.8	509.2	83.6	73.15	91.2	61.75	63.46	63.65	63.84	64.03	64.22	64.41	64.6	76.855	91.6227	99.7832	109.639	121.424	123.374	121.671	305.967	425.642	460.802	492.073	626.068	641.299	635.628	675.486	799.922	909.127	1008.94	1018.33	617.481	839.78	745.805	702.058	626.068	636.438	822.768	902.484	878.021	909.667	900.851	936.799	869.077
44	BRB	Barbados	0	0	0	0	0	0	0	0	0	0	0	0	0	0	0	0	0	0	0	0	0	0	0	0	0	0	0	0	0	0	0	0	0	0	0	0	0	0	0	0	0	0	0	0	0	0	0
45	BOL	Bolivia	0	0	0	0	10.545	10.545	10.545	10.545	10.545	10.545	17.67	23.0708	23.0708	22.8	21.4501	21.5412	26.22	25.8153	29.2049	36.8866	37.1735	39.4687	36.1	37.1039	35.1596	32.2432	31.271	36.1318	30.4609	22.8457	27.5444	27.5444	36.1318	42.7748	47.4736	58.9774	60.7597	57.0331	57.0331	58.9774	67.4028	75.9902	110.291	120.661	141.077	155.289	186.889
46	CHL	Chile	105.45	137.75	152.95	96.9	106.4	132.05	192.85	270.75	235.6	297.454	345.788	323.72	365.836	341.734	346.355	356.01	344.733	390.534	550.911	572.184	512.8	470.448	487.206	663.172	777.076	723.932	736.246	763.79	732.519	731.547	689.744	794.251	786.636	826.494	1089.62	1107.77	1203.69	1128.67	1295.88	1142.93	1176.15	1363.29	1938.71	1290.48	1315.58	1360.47	1314.93
47	COL	Colombia	0	0	0	0	28.5047	46.2071	63.9093	81.6116	99.3139	117.016	134.719	158.65	178.6	200.366	197.403	245.649	267.545	287.468	315.652	328.916	345.562	450.99	550.978	615.536	664.954	829.411	913.826	993.705	1158.97	1150.38	1166.59	1288.27	1391.8	1493.39	1630.14	1743.24	1873.34	1978.34	2116.54	2010.26	2248.76	2287.64	2655.61	2686.21	2709.35	2996.91	3170.41
48	CRI	Costa Rica	0	0	0	0	0	0	0	0	0	0	0	0	0	0	0	0	0	0	0	0	0	0	0	0	0	0	0	0	0	0	0	0	0	0	0	0	31.271	113.094	109.205	105.479	125.408	150.036	177.5	201.102	244.759	253.189	274.886
49	CUB	Cuba	0	0	0	0	0	0	0	108.816	115.494	122.172	128.85	135.528	142.206	147.773	157.785	161.129	165.062	206.529	254.256	262.551	270.706	296.675	300.438	362.938	399.07	386.594	399.88	403.769	396.153	634.656	679.213	594.635	379.951	286.624	285.004	771.405	765.734	761.036	760.064	851.284	740.945	761.522	704.83	710.276	705.383	1392.54	1382.81
50	DOM	Dominican Republic	0	0	0	0	0	0	0	0	0	0	0	0	0	0	0	0	0	0	0	15.96	41.2794	50.883	66.9209	98.8358	130.107	123.464	151.98	222.3	234.614	266.047	256.487	180.497	161.54	225.216	244.173	217.601	283.059	201.398	262.158	294.563	310.604	370.553	467.876	562.231	633.995	540.137	558.991
51	ECU	Ecuador	0	0	0	0	9.5	9.5	9.5	9.5	9.5	9.5	11.4	13.5366	15.657	16.3524	18.8119	26.467	32.9565	35.6288	36.5722	31.5694	38.3505	49.6375	54.7266	75.018	84.5775	86.5218	90.2484	138.694	144.365	147.282	151.98	149.226	191.029	208.041	184.223	245.145	273.662	308.821	416.083	408.305	412.356	433.257	314.502	348.292	327.196	451.52	461.775
52	SLV	El Salvador	0	0	0	0	0	0	0	0	0	0	0	0	0	0	0	0	0	0	0	0	0	0	0	0	0	34.1875	46.5014	54.1167	65.6205	80.6889	82.6332	78.9066	81.6611	71.2914	60.7597	74.0458	85.5497	76.9623	134.968	135.778	146.309	134.968	155.097	175.43	203.966	223.65	273.21
53	GUF	French Guiana	0	0	0	0	0	0	0	0	0	0	0	0	0	0	0	0	0	0	0	0	0	0	0	0	0	0	0	0	0	0	0	0	0	0	0	0	0	0	0	0	0	0	0	0	0	0	0
54	GLP	Guadeloupe	0	0	0	0	0	0	0	0	0	0	0	0	0	0	0	0	0	0	0	0	0	0	0	0	0	0	0	0	0	0	0	0	0	0	0	0	0	0	0	0	0	0	0	0	0	0	0
55	GTM	Guatemala	0	0	0	0	0	0	0	0	0	18.05	18.05	18.05	18.05	18.05	18.05	19.95	21.85	27.55	27.55	26.22	29.9944	34.0594	39.5295	54.1167	57.0331	54.1167	58.9774	75.018	75.9902	93.1649	112.122	110.178	106.451	119.089	111.15	149.226	176.77	223.272	191.839	212.74	170.937	177.58	212.828	213.939	247.309	288.636	286.619
56	GUY	Guyana	0	0	0	0	0	0	0	0	0	0	0	0	0	0	0	0	0	0	0	0	0	0	0	0	0	0	0	0	0	0	0	0	0	0	0	0	0	0	0	0	0	0	0	0	0	0	0
57	HTI	Haiti	0	0	0	0	0	0	0	0	0	0	0	0	0	0	0	0	0	0	0	0	0	0	0	0	0	0	0	0	0	0	34.1875	36.1318	45.5293	41.8027	41.8027	47.4736	53.1445	39.8584	36.1318	38.0761	39.8584	47.4736	58.5922	67.6046	75.6375	100.432	131.577
58	HND	Honduras	0	0	0	0	0	0	0	0	0	0	0	0	0	0	0	0	0	0	0	0	0	0	0	0	0	0	0	0	0	0	0	10.3697	32.2432	38.8862	53.1445	57.0331	69.3471	89.2763	99.808	105.479	122.492	125.408	144.757	153.18	181.87	218.587	198.622
59	JAM	Jamaica	0	0	0	0	0	0	0	0	0	0	0	0	0	0	0	0	0	0	0	0	0	0	0	0	71.2914	95.9193	93.1649	103.535	126.38	106.451	169.155	187.14	201.398	204.153	190.056	188.112	263.13	295.373	332.477	318.219	388.538	393.237	419.624	399.637	390.935	374.72	368.75
60	MTQ	Martinique	0	0	0	0	0	0	0	0	0	0	0	0	0	0	0	0	0	0	0	0	0	0	0	0	0	22.8457	22.8457	27.5444	39.8584	40.8305	0	0	0	0	0	0	0	0	0	0	0	0	0	0	0	0	0
61	NIC	Nicaragua	0	0	0	0	0	0	0	0	0	0	0	0	0	0	0.589	11.9985	9.5323	15.2	9.47625	15.161	15.409	15.6389	15.6864	18.957	17.9849	0	0	0	0	0	38.0761	33.2153	30.4609	37.1039	43.747	51.3622	58.0053	62.704	79.8788	91.2206	96.8915	103.535	120.631	109.537	110.482	178.92	217.898
62	PAN	Panama	0	0	0	0	0	0	0	0	0	0	0	0	0	0	0	0	0	0	0	0	39.235	50.92	48.4224	71.2914	88.3041	75.9902	73.0737	69.3471	66.4306	75.018	63.6762	92.1927	103.535	108.233	102.562	134.968	118.765	157.651	142.421	142.583	156.679	165.266	231.784	265.284	276.204	403.415	364.56
63	PRY	Paraguay	0	0	0	0	0	0	0	0	0	0	0	0	0	0	0	0	0	0	0	0	0	0	0	0	3.7266	2.91647	6.64306	11.3418	13.2861	11.3418	6.64306	12.314	13.2861	15.2304	16.2026	17.1747	21.8735	27.5444	24.6279	13.2861	22.8457	35.1596	83.58	57.3356	67.1389	69.205	95.5398
64	PER	Peru	45.6	46.55	23.75	0	19.95	25.65	43.7	57	71.25	78.8956	96.311	113.987	118.256	159.478	179.438	196.452	236.11	251.647	247.586	242.862	268.254	266.475	314.732	342.037	352.406	426.452	458.857	517.673	524.478	518.645	574.706	552.832	570.979	621.369	627.04	716.317	772.378	966.161	1015.58	989.978	1053.49	1080.23	1075.34	1364.93	1523.8	2195.15	1599.03
65	SUR	Suriname	0	0	0	0	0	0	0	0	0	0	0	0	0	0	0	0	0	0	0	0	0	0	0	0	0	0	0	0	0	0	0	0	0	0	0	0	0	0	0	0	0	0	0	0	0	57.3895	41.9034
66	TTO	Trinidad and Tobago	0	0	0	0	0	0	0	0	0	0	0	0	0	0	0	0	0	0	0	0	0	0	0	0	0	0	22.8457	114.876	132.051	126.38	142.421	170.937	168.183	93.1649	16.2026	153.925	167.211	180.497	201.398	180.497	199.454	230.887	257.633	241.323	268.555	235.466	223.764
67	URY	Uruguay	0	0	0	0	149.15	129.2	100.902	94.7891	105.519	140.384	150.441	156.212	130.986	170.115	142.566	124.967	157.691	205.762	258.865	266.789	273.093	278.708	289.286	285.976	285.004	282.087	282.087	252.76	322.108	396.153	411.384	400.852	394.209	369.581	355.323	323.08	391.293	409.439	454.159	399.88	489.318	443.627	473.046	431.3	4260.34	481.059	505.355
68	VEN	Venezuela	0	0	0	0	42.3947	42.3947	42.3947	42.3947	42.3947	42.3947	37.8698	37.1735	82.7146	109.644	115.741	106.135	113.686	109.995	121.913	138.587	203.787	270.75	475.956	589.936	797.978	932.945	1152.33	1217.95	1378.52	1659.63	1535.2	1778.4	1412.7	1437.33	1434.58	1501.01	1757.5	2006.37	2008.31	2135.66	2316.16	1976.07	2516.88	2640.86	2793.49	3174.99	3227.4
69	ALB	Albania	0	0	0	0	0	0	0	0	0	13.3	0	0	0	13.3	0	0	0	0	0	0	0	0	0	15.2304	16.2026	12.314	14.2583	40.8305	71.2914	66.4306	74.0458	70.3192	69.3471	114.066	114.066	123.464	120.709	142.421	128.325	123.14	286.948	311.576	344.66	341.758	338.855	479.573	474.597
70	BIH	Bosnia and Herzegovina	0	0	0	0	0	0	0	0	0	0	0	0	0	0	0	0	0	0	0	0	0	0	0	0	0	0	0	0	0	0	0	0	0	0	0	0	0	0	0	0	0	0	0	0	0	0	0
71	ISL	Iceland	0	0	0	0	0	0	0	0	0	0	0	0	0	0	0	0	0	0	0	0	0	0	0	0	0	448.326	562.392	638.382	596.579	429.369	31.271	74.0458	69.3471	71.2914	92.1927	93.1649	102.562	108.233	109.205	110.178	94.9472	88.3041	80.9951	93.9833	121.141	124.303	142.379
72	MKD	North Macedonia	0	0	0	0	0	0	0	0	0	0	0	0	0	0	0	0	0	0	0	0	0	0	0	0	0	0	0	0	0	0	0	0	0	0	0	0	0	0	0	0	0	0	0	0	0	0	0
73	SRB	Serbia	0	0	0	0	0	0	0	0	0	0	0	0	0	0	0	0	0	0	0	0	0	0	0	0	0	0	0	0	0	0	0	0	0	0	0	0	0	0	0	0	0	0	0	0	0	0	0
74	RUS	Russia	1807.85	2248.65	2959.25	3165.4	3306.95	2574.5	3356.35	4241.75	5552.75	5579.35	5411.2	5415	5510	5510	5510	5510	5510	1710	3230	4560	6270	7600	9975	11779.3	14649	15163	18042.6	21375.1	23655.1	27550.2	31640.9	36845	43244.2	48450.3	54435.4	57967.5	61687.8	68769.1	75992.9	80560.6	83137.8	85254.5	90467.2	94459.2	97153.2	101376	105549
75	UKR	Ukraine	0	0	0	0	0	0	0	0	0	0	0	0	0	0	0	0	0	0	0	0	0	0	0	0	0	0	0	0	0	0	0	0	0	0	0	0	0	0	0	0	0	0	0	0	0	0	0
76	BLR	Belarus	0	0	0	0	0	0	0	0	0	0	0	0	0	0	0	0	0	0	0	0	0	0	0	0	0	0	0	0	0	0	0	0	0	0	0	0	0	0	0	0	0	0	0	0	0	0	0
77	EST	Estonia	0	0	0	0	0	0	0	0	0	0	0	0	0	0	0	0	0	0	0	0	0	0	0	0	0	0	0	0	0	0	0	0	0	0	0	0	0	0	0	0	0	0	0	0	0	0	0
78	LVA	Latvia	0	0	0	0	0	0	0	0	0	0	0	0	0	0	0	0	0	0	0	0	0	0	0	0	0	0	0	0	0	0	0	0	0	0	0	0	0	0	0	0	0	0	0	0	0	0	0
79	LTU	Lithuania	0	0	0	0	0	0	0	0	0	0	0	0	0	0	0	0	0	0	0	0	0	0	0	0	0	0	0	0	0	0	0	0	0	0	0	0	0	0	0	0	0	0	0	0	0	0	0
80	GEO	Georgia	0	0	0	0	0	0	0	0	0	0	0	0	0	0	0	0	0	0	0	0	0	0	0	0	0	0	0	0	0	0	0	0	0	0	0	0	0	0	0	0	0	0	0	0	0	0	0
81	AZE	Azerbaijan	0	0	0	0	0	0	0	0	0	0	0	0	0	0	0	0	0	0	0	0	0	0	0	0	0	0	0	0	0	0	0	0	0	0	0	0	0	0	0	0	0	0	0	0	0	0	0
82	ARM	Armenia	0	0	0	0	0	0	0	0	0	0	0	0	0	0	0	0	0	0	0	0	0	0	0	0	0	0	0	0	0	0	0	0	0	0	0	0	0	0	0	0	0	0	0	0	0	0	0
83	KAZ	Kazakhstan	0	0	0	0	0	0	0	0	0	0	0	0	0	0	0	0	0	0	0	0	0	0	0	0	0	0	0	0	0	0	0	0	0	0	0	0	0	0	0	0	0	0	0	0	0	0	0
84	KGZ	Kyrgyzstan	0	0	0	0	0	0	0	0	0	0	0	0	0	0	0	0	0	0	0	0	0	0	0	0	0	0	0	0	0	0	0	0	0	0	0	0	0	0	0	0	0	0	0	0	0	0	0
85	TJK	Tajikistan	0	0	0	0	0	0	0	0	0	0	0	0	0	0	0	0	0	0	0	0	0	0	0	0	0	0	0	0	0	0	0	0	0	0	0	0	0	0	0	0	0	0	0	0	0	0	0
86	UZB	Uzbekistan	0	0	0	0	0	0	0	0	0	0	0	0	0	0	0	0	0	0	0	0	0	0	0	0	0	0	0	0	0	0	0	0	0	0	0	0	0	0	0	0	0	0	0	0	0	0	0
87	TKM	Turkmenistan	0	0	0	0	0	0	0	0	0	0	0	0	0	0	0	0	0	0	0	0	0	0	0	0	0	0	0	0	0	0	0	0	0	0	0	0	0	0	0	0	0	0	0	0	0	0	0
88	MDA	Moldova	0	0	0	0	0	0	0	0	0	0	0	0	0	0	0	0	0	0	0	0	0	0	0	0	0	0	0	0	0	0	0	0	0	0	0	0	0	0	0	0	0	0	0	0	0	0	0
89	DZA	Algeria	49.4	55.1	0	83.6	83.6	73.15	91.2	61.75	63.46	63.65	63.84	64.03	64.22	64.41	64.6	76.855	91.6227	99.7832	109.639	121.424	123.374	121.671	305.967	425.642	460.802	492.073	626.068	641.299	635.628	675.486	799.922	909.127	1008.94	1018.33	617.481	839.78	745.805	702.058	626.068	636.438	822.768	902.484	878.021	913.042	907.58	947.371	882.244
90	AGO	Angola	0	0	0	0	0	0	0	0	0	0	0	0	0	0	0	0	0	0	0	0	0	0	0	0	0	27.5444	39.8584	66.4306	82.6332	82.6332	157.651	147.282	152.952	149.226	154.897	184.223	203.343	232.831	250.816	265.074	296.345	363.91	427.378	501.615	582.221	722.903	712.942
91	BEN	Benin	0	0	0	0	0	0	0	0	0	0	0	0	0	0	0	0	0	0	0	0	0	0	0	0	0	0	0	0	0	0	0	0	0	0	0	0	0	0	0	0	0	0	0	0	0	0	0
92	BWA	Botswana	0	0	0	0	0	0	0	0	0	0	0	0	0	0	0	0	0	0	0	0	0	0	0	0	0	0	0	0	0	0	0	0	0	0	0	0	0	0	0	0	0	0	0	0	0	0	0
93	BFA	Burkina Faso	0	0	0	0	0	0	0	0	0	0	0	0	0	0	0	0	0	0	0	0	0	0	0	0	0	0	0	0	0	0	0	0	0	0	0	0	0	0	0	0	0	0	0	0	0	0	0
94	BDI	Burundi	0	0	0	0	0	0	0	0	0	0	0	0	0	0	0	0	0	0	0	0	0	0	0	0	0	0	0	0	0	0	0	0	0	0	0	0	0	0	0	0	0	0	0	0	0	0	0
95	CMR	Cameroon	0	0	0	0	0	0	0	0	0	0	0	0	0	0	0	0	0	0	0	0	0	0	0	0	0	0	0	0	0	0	10.3697	10.3697	0	0	0	0	0	0	0	0	0	0	28.4344	133.134	160.111	180.939	188.87
96	TCD	Chad	0	0	0	0	0	0	0	0	0	0	0	0	0	0	0	0	0	0	0	0	0	0	0	0	0	0	0	0	0	0	0	0	0	0	0	0	0	0	0	0	0	0	0	0	0	0	0
97	COG	Congo (Brazzaville)	38.95	57	60.8	42.75	0	0	0	0	0	0	0	0	0	0	0	0	0	0	0	0	0	0	0	0	0	0	0	0	0	0	0	0	0	0	0	0	0	0	0	0	0	0	0	0	0	0	0
98	COD	Congo (Kinshasa)	0	0	0	0	0	0	0	0	0	0	0	0	0	0	0	0	0	0	0	0	0	0	0	0	0	0	0	0	0	0	0	0	0	0	0	233.641	213.712	235.586	250.816	246.928	0	0	0	0	0	0	0
99	CIV	Côte d'Ivoire	0	0	0	0	0	0	0	0	0	0	0	0	0	0	0	0	0	0	0	0	0	0	0	0	0	0	0	0	0	0	0	0	0	0	0	0	0	0	0	0	0	0	0	0	0	0	0
100	DJI	Djibouti	0	0	0	0	0	0	0	0	0	0	0	0	0	0	0	0	0	0	0	0	0	0	0	0	0	0	0	0	0	0	0	0	0	0	0	0	0	0	0	0	0	0	0	0	0	0	0
101	ERI	Eritrea	0	0	0	0	0	0	0	0	0	0	0	0	0	8.55	23.75	26.125	36.1	0	0	0	0	0	0	0	0	0	0	0	0	0	0	0	0	0	0	0	0	0	0	0	0	0	0	0	0	0	0
102	ETH	Ethiopia	0	0	0	0	0	0	0	0	0	0	0	0	0	19	19	23.75	0	0	0	0	7.6	7.6	5.7	5.67091	5.67091	9.55953	26.5723	30.4609	25.6001	30.4609	30.4609	23.8178	26.5723	28.5166	38.8862	32.2432	41.8027	91.2206	94.9472	142.583	165.266	157.651	172.33	200.13	177.235	116.928	108.047
103	GAB	Gabon	0	0	0	0	0	0	0	0	0	0	0	0	0	0	0	0	0	0	0	0	0	0	0	0	0	0	0	0	0	0	0	0	0	0	0	0	0	0	0	0	0	0	0	0	0	0	0
104	GHA	Ghana	0	0	0	0	0	0	0	0	0	0	0	0	0	0	0	0	0	0	0	0	0	0	0	0	0	0	0	0	0	0	0	0	0	0	0	0	0	0	0	0	218.573	387.566	419.624	502.473	391.287	410.527	425.383
105	GIN	Guinea	0	0	0	0	0	0	0	0	0	0	0	0	0	0	0	0	0	0	0	0	0	0	0	0	0	0	0	0	0	0	0	0	0	0	0	0	0	0	0	0	0	0	0	0	0	0	0
106	KEN	Kenya	0	0	0	0	0	0	0	0	0	0	0	0	0	0	0	0	0	0	0	0	0	0	0	18.957	31.271	34.1875	67.4028	124.436	176.77	195.727	206.097	298.29	335.394	313.52	328.751	326.806	400.852	459.83	459.83	455.131	515.891	609.866	752.22	751.563	847.646	745.094	803.123
107	LBR	Liberia	0	0	0	0	0	0	0	0	0	0	0	0	0	0	0	0	0	0	0	0	0	0	0	0	0	0	0	0	0	0	0	0	0	0	0	0	0	0	0	0	47.4736	66.4306	86.165	85.8929	85.6208	83.6417	80.8228
108	LBY	Libya	0	0	0	0	0	0	0	0	0	0	0	0	0	0	0	0	0	0	0	0	0	0	0	0	0	0	0	0	0	0	0	0	0	0	0	0	0	0	0	0	0	46.9875	90.4732	67.8554	77.0587	74.2534	468.772
109	MDG	Madagascar	0	0	0	0	0	0	0	0	0	0	0	0	0	0	0	0	0	0	0	0	3.8	6.65	6.65	4.69875	4.75	0	0	0	0	0	0	0	0	0	0	0	0	0	0	0	0	0	0	0	0	0	0
110	MWI	Malawi	0	0	0	0	0	0	0	0	0	0	0	0	0	0	0	0	0	0	0	0	0	0	0	0	0	0	0	0	0	0	0	0	0	0	0	23.8178	29.4887	29.4887	41.8027	41.8027	53.1445	72.2636	65.4854	59.2661	68.4966	83.6417	76.5689
111	MLI	Mali	0	0	0	0	0	0	0	0	0	0	0	0	0	0	0	0	0	0	0	0	0	0	0	0	0	0	0	0	0	0	0	0	0	0	0	0	0	0	0	0	0	0	0	0	0	44.3813	42.5383
112	MRT	Mauritania	0	0	0	0	0	0	0	0	0	0	0	0	0	0	0	0	0	0	0	0	0	0	0	0	0	0	0	0	0	0	0	0	0	0	0	0	0	0	0	0	0	0	0	0	0	0	0
113	MAR	Morocco	57	61.75	70.3	142.5	209	190.95	174.8	171	152	148.2	156.75	156.75	156.75	156.75	156.75	133	103.569	72.9932	166.421	207.933	249.12	250.8	304.95	358.077	413.328	579.567	626.068	692.499	604.195	461.612	387.566	476.842	551.05	598.524	663.172	721.015	880.611	750.504	814.18	825.522	946.231	879.639	1334.7	1396.62	1455.55	1523.47	1639.43
114	MOZ	Mozambique	13.3	19.95	21.85	22.8	28.5	0	0	0	11.4	14.2091	23.0821	26.2371	26.4983	25.897	23.6939	29.1146	26.5354	32.223	24.9612	34.0651	35.3466	43.5489	47.5	74.0458	78.9066	82.6332	96.8915	130.107	143.393	157.651	170.937	202.37	210.958	201.398	175.798	158.623	172.882	209.013	213.712	231.859	273.662	289.702	373.956	398.543	441.803	575.25	436.443
115	NAM	Namibia	0	0	0	0	0	0	0	0	0	0	0	0	0	0	0	0	0	0	0	0	0	0	0	0	0	0	0	0	0	0	0	0	0	0	0	0	0	0	0	0	0	0	0	0	0	0	0
116	NER	Niger	0	0	0	0	0	0	0	0	0	0	0	0	0	0	0	0	0	0	0	0	0	0	0	0	0	0	0	0	0	0	107.423	116.821	147.282	434.229	455.941	0	0	0	14.2583	20.9013	21.8735	23.8178	28.4344	28.3447	33.3921	68.279	19.5676
117	NGA	Nigeria	0	0	0	0	0	0	0	0	0	0	0	0	0	0	0	0	0	0	0	0	0	0	0	0	0	0	0	0	0	0	0	0	0	0	0	499.688	629.795	933.917	951.902	744.833	545.379	537.764	557.488	619.288	1059.99	1149.65	1125.56
118	REU	Reunion	0	0	0	0	0	0	0	0	0	0	0	0	0	0	0	0	0	0	0	0	0	0	0	0	0	0	0	0	0	0	0	0	0	0	0	0	0	0	0	0	0	0	0	0	0	0	0
119	RWA	Rwanda	0	0	0	0	0	0	0	0	0	0	0	0	0	0	0	0	0	0	0	0	0	0	0	0	0	0	0	0	0	0	0	0	0	0	0	0	0	0	0	0	0	0	0	0	0	0	0
120	SEN	Senegal	0	0	0	0	0	0	0	0	0	0	0	0	0	0	0	0	0	0	0	0	0	0	0	0	0	0	0	0	0	0	141.611	165.266	159.596	172.882	173.854	180.497	194.755	171.91	184.223	166.239	191.839	196.699	229.199	228.475	316.797	278.237	311.38
121	SLE	Sierra Leone	0	0	0	0	0	0	0	0	0	0	0	0	0	0	0	0	0	0	0	0	0	0	0	0	0	0	0	0	0	0	0	0	0	0	0	0	0	0	0	0	41.8027	34.1875	28.4344	0	0	0	0
122	SDN	Sudan	0	0	0	0	0	0	0	0	0	0	0	0	0	0	0	0	0	0	0	0	0	0	0	0	0	0	0	0	0	0	84.5775	94.9472	114.876	78.9066	80.6889	110.178	86.5218	75.9902	94.9472	85.5497	137.722	166.239	148.204	159.761	149.836	195.449	281.604
123	TZA	Tanzania	0	0	0	0	0	0	0	0	0	0	0	0	0	0	0	0	0	0	0	0	0	0	0	0	0	0	0	0	0	0	0	0	0	0	0	0	0	0	45.5293	141.611	148.254	161.54	158.544	168.35	223.47	295.307	277.35
124	TGO	Togo	0	0	0	0	0	0	0	0	0	0	0	0	0	0	0	0	0	0	0	0	0	0	0	0	0	0	0	0	0	0	0	0	0	0	0	0	0	0	0	0	0	0	0	0	0	107.539	119.958
125	TUN	Tunisia	0	0	0	0	2.85	37.05	32.585	37.715	46.17	53.58	65.265	65.265	65.265	54.34	53.485	21.85	55.575	56.62	79.363	109.345	153.615	159.249	160.74	177.58	197.672	214.684	269.773	363.91	342.037	380.923	327.778	419.971	384.812	341.065	344.791	343.009	432.285	431.313	454.159	448.326	483.485	572.924	519.575	553.15	593.352	493.315	506.206
126	UGA	Uganda	0	0	0	0	0	0	0	0	0	0	0	0	0	0	0	0	0	0	0	0	0	0	0	0	0	21.8735	39.8584	47.4736	58.0053	81.6611	98.8358	77.9345	68.3749	59.7876	53.1445	52.1723	69.3471	124.436	114.876	132.051	147.282	164.294	179.223	191.541	156.686	134.851	143.779
127	ZMB	Zambia	0	0	0	0	0	0	0	0	0	0	0	0	0	0	0	0	0	0	0	0	0	0	0	0	0	0	0	0	0	0	0	0	0	0	0	110.178	143.393	209.986	209.013	231.859	323.89	240.284	169.745	445.784	458.071	387.483	357.322
128	ZWE	Zimbabwe	0	0	0	0	0	0	0	0	0	0	0	0	0	0	0	0	0	65.93	63.08	67.64	65.55	0	0	160.568	235.586	306.877	377.196	469.389	487.374	689.744	756.175	565.308	570.007	416.083	379.951	237.53	237.53	237.53	237.53	237.53	322.108	362.938	451.505	529.1	565.097	0	0
129	AFG	Afghanistan	0	0	0	0	0	0	0	0	0	0	0	0	0	0	0	0	0	0	0	0	0	0	0	0	0	0	0	0	0	0	0	0	0	0	0	0	0	0	0	0	0	0	0	0	0	0	0
130	BHR	Bahrain	0	0	0	0	0	0	0	0	0	0	0	0	0	0	0	0	0	0	0	0	0	0	0	0	0	0	0	0	0	0	0	0	0	0	0	0	0	0	0	0	0	0	0	0	0	0	0
131	IRQ	Iraq	0	0	0	0	0	0	0	0	0	0	0	0	0	0	0	0	0	0	0	0	0	6.65665	62.7484	71.2914	98.8358	168.183	188.112	301.206	465.5	573.734	635.628	628.012	587.182	890.17	874.94	893.897	1037.45	1220.7	1274.98	1519.97	1328.61	1328.61	1292.47	1289.75	1287.03	1712.42	1708.79
132	ISR	Israel	0	0	0	0	0	0	0	0	0	0	0	0	0	0	0	0	0	139.875	252.638	311.974	151.872	229.323	361.122	417.055	423.698	441.683	534.848	664.954	582.321	683.101	677.43	741.917	765.734	803.649	906.373	970.859	1043.12	1197.05	1109.55	764.762	1050.74	1242.58	1314.88	1331.89	1372.84	1187.56	1691.7
133	JOR	Jordan	0	0	0	0	0	0	0	0	0	0	0	0	0	0	0	0	0	0	0	0	0	0	0	0	0	0	59.7876	80.6889	85.5497	101.59	108.233	104.507	156.679	211.93	223.272	270.745	292.619	289.702	356.295	285.166	455.941	361.966	359.308	397.244	378.388	582.221	561.337
134	XKX	Kosovo	0	0	0	0	0	0	0	0	0	0	0	0	0	0	0	0	0	0	0	0	0	0	0	0	0	0	0	0	0	0	0	0	0	0	0	0	0	0	0	0	0	0	0	0	0	0	0
135	KWT	Kuwait	0	0	0	0	0	0	0	0	0	0	0	0	0	0	0	0	0	0	0	0	0	0	0	0	0	0	0	0	0	0	0	0	0	0	0	0	0	0	0	0	0	0	0	0	0	0	0
136	LBN	Lebanon	0	0	0	0	0	0	0	0	0	0	0	0	0	0	0	0	0	0	0	0	0	0	0	0	0	0	0	0	0	0	481.703	705.785	811.264	830.383	817.907	851.284	837.026	921.441	1041.18	965.188	860.682	1190.4	1271.8	1420.45	1537.58	1566	1642.15
137	OMN	Oman	0	0	0	0	0	0	0	0	0	0	0	0	0	0	0	0	0	0	0	0	0	0	0	0	0	0	0	0	0	0	0	0	0	0	0	0	0	0	0	0	0	0	0	0	0	0	0
138	PSE	Palestine	0	0	0	0	95	128.25	135.85	177.65	156.75	150.1	93.5237	106.732	141.063	109.099	205.748	158.464	167.674	139.875	252.638	0	0	0	0	0	0	0	0	0	0	0	0	0	0	0	0	0	0	0	0	0	0	0	0	0	0	0	0
139	QAT	Qatar	0	0	0	0	0	0	0	0	0	0	0	0	0	0	0	0	0	0	0	0	0	0	0	0	0	0	0	0	0	0	0	0	0	0	0	0	0	0	0	0	0	129.621	241.262	240.754	240.246	94.1829	93.9833
140	SYR	Syria	0	0	0	0	0	0	0	0	0	0	0	0	0	0	0	0	0	0	0	0	0	0	0	0	0	0	0	0	0	0	367.637	424.67	464.528	512.974	569.035	650.696	603.223	640.326	586.21	653.613	870.241	887.254	915.934	861.556	998.738	800.554	909.075
141	ARE	United Arab Emiratese	0	0	0	0	0	0	0	0	0	0	0	0	0	0	0	0	0	0	0	0	0	0	0	0	0	0	0	0	0	0	0	0	0	0	0	0	0	0	0	0	0	0	0	0	0	0	0
142	YEM	Yemen	0	0	0	0	0	0	0	0	0	0	0	0	0	0	0	0	0	0	0	0	0	0	0	0	0	0	0	0	0	0	0	0	0	0	0	0	0	0	0	0	0	0	0	0	0	11.1307	34.1758
143	BGD	Bangladesh	0	0	0	0	0	0	0	0	0	0	0	0	0	0	0	0	0	0	0	0	0	0	0	0	0	0	0	0	0	0	0	0	0	0	0	0	0	0	0	0	0	0	0	0	0	28.0594	81.2637
144	BTN	Bhutan	0	0	0	0	0	0	0	0	0	0	0	0	0	0	0	0	0	0	0	0	0	0	0	0	0	0	0	0	0	0	0	0	0	0	0	0	0	0	0	0	0	0	0	0	0	0	0
145	MMR	Burma	0	0	0	0	0	0	0	0	0	0	0	0	0	0	0	0	0	0	0	0	0	0	0	16.2026	38.8862	38.8862	58.0053	57.0331	37.1039	33.2153	34.1875	34.1875	42.7748	38.0761	38.0761	117.793	124.436	128.325	133.995	123.464	167.211	173.854	158.544	186.156	174.231	177.71	157.448
146	NPL	Nepal	0	0	0	0	0	0	0	0	0	0	0	0	0	0	0	0	0	0	0	0	0	0	0	0	0	0	0	0	0	0	0	0	0	0	0	0	0	0	0	0	0	0	0	0	0	0	0
147	PAK	Pakistan	0	0	0	0	0	0	0	0	0	0	0	0	0	0	0	0	0	0	0	0	310.81	409.45	399.95	481.703	516.8	575.678	649.724	658.311	746.777	1040.21	1035.51	951.902	1101.13	1180.84	1325.21	1423.07	1468.76	1621.72	1791.68	1937.99	2315.19	2544.13	2441.92	2478.36	2536.6	2694.55	3217.53
148	LKA	Sri Lanka	0	0	0	0	0	0	0	0	0	0	0	0	0	0	0	0	0	0	0	0	0	0	0	59.7876	58.0053	60.7597	79.8788	72.2636	80.6889	46.5014	75.9902	90.2484	80.6889	77.9345	80.6889	71.2914	71.2914	81.6611	78.9066	182.441	210.796	268.801	309.332	364.591	360.419	395.382	441.871
149	HKG	Hong Kong	0	0	0	0	0	0	0	0	0	0	104.534	0	0	104.5	104.5	104.5	104.5	104.5	104.5	32.509	50.54	55.765	64.98	67.4028	64.6483	60.7597	94.9472	111.15	114.876	98.8358	144.365	134.968	142.421	174.826	201.398	206.097	204.315	228.943	234.614	204.315	356.295	359.049	408.422	483.834	389.457	413.238	532.446
150	PRK	Korea, North	0	0	0	0	0	0	0	0	0	0	0	0	0	0	0	0	0	127.015	142.5	142.5	0	0	0	0	0	285.004	475.06	342.037	570.007	570.007	1162.86	1829.76	2170.82	2148.95	2257.18	2403.49	2479.48	2280.03	2374.98	2462.79	2560.01	2851.66	3808.49	4538.09	4987.79	5441.82	5586.88
151	MNG	Mongolia	0	0	0	0	0	0	0	0	0	0	0	0	0	0	0	0	0	0	0	0	0	0	0	0	0	0	0	0	0	0	0	0	0	0	0	0	0	0	0	0	71.2914	113.418	91.3349	90.0755	89.6777	136.896	159.141
152	TWN	Taiwan	0	0	0	0	0	0	0	0	0	0	0	0	0	201.666	216.702	293.924	232.75	403.75	197.654	578.257	223.25	266.76	315.4	369.581	423.698	494.017	509.247	560.448	560.448	573.734	964.216	1013.63	1123.81	1429.72	1767.05	2133.72	2237.25	2321.83	2956.49	3312.62	3793.35	3883.6	4088.53	4768.85	5356.75	5713.91	5757.87
153	BRN	Brunei	0	0	0	0	0	0	0	0	0	0	0	0	0	0	0	0	0	0	0	0	0	0	0	0	0	0	0	0	0	0	0	0	0	0	0	0	0	0	0	0	0	0	0	0	0	0	0
154	KHM	Cambodia	0	0	0	0	0	0	0	0	0	0	0	0	0	0	0	0	0	0	0	0	0	0	0	0	0	0	0	0	0	0	0	0	0	0	0	0	9.55953	47.4736	56.061	57.0331	56.7091	56.7091	36.1893	56.0072	93.9198	74.1019	47.3907
155	LAO	Laos	0	0	0	0	0	0	0	0	0	0	0	0	0	0	0	0	0	0	0	0	0	0	0	0	0	0	0	0	0	0	0	0	0	0	0	0	0	0	0	0	0	0	0	0	0	0	0
156	MYS	Malaysia	0	0	0	0	0	0	0	0	0	0	0	0	0	0	0	0	0	0	0	0	0	0	0	0	0	30.4609	81.6611	103.535	98.8358	108.233	104.507	183.413	271.717	314.492	302.178	343.981	442.655	702.058	807.537	793.279	890.17	924.358	977.973	1040.87	1006.41	1214.06	1295.92
157	PHL	Philippines	61.75	0	0	0	108.3	90.25	0	0	0	140.6	159.076	177.551	196.027	175.512	154.998	134.484	113.97	25.8695	53.4479	127.222	114.365	191.035	277.448	293.591	294.563	276.416	294.563	379.951	415.11	485.43	609.866	690.716	755.203	968.105	913.016	903.457	1140.99	1452.56	1532.44	2006.37	2435.9	2802.56	2323.87	2672.84	2757.28	3855.02	3326.83
158	SGP	Singapore	0	0	0	0	0	0	0	0	0	0	0	0	0	0	0	0	0	0	0	0	0	0	0	0	0	0	0	0	0	0	0	0	0	0	0	184.223	190.056	192.811	368.609	447.516	538.736	591.881	689.32	582.475	958.155	976.249	1033.98
159	THA	Thailand	0	0	0	0	49.4	41.8	48.45	46.55	58.9	73.15	77.9	87.4	111.021	111.15	0	0	0	0	0	55.86	78.66	120.84	157.32	296.345	234.614	273.662	364.882	366.665	378.168	381.895	433.257	484.458	499.688	757.147	914.798	946.231	1006.99	1186.52	1408.82	1650.23	2246.81	2282.95	2495.34	2639.23	3221.71	3519.84	3725.77
160	NZL	New Zealand	0	0	0	0	141.55	165.3	173.85	181.45	184.3	712.5	209	223.25	251.75	287.783	256.998	256.813	215.46	225.72	218.405	208.439	234.845	241.337	242.752	154.85	0	266.047	306.877	388.538	428.397	427.424	532.903	533.875	586.21	618.453	599.496	685.856	748.56	799.922	834.109	773.35	724.904	762.818	787.548	781.517	854.757	1004.68	1054.66
161	FJI	Fiji	0	0	0	0	0	0	0	0	0	0	0	0	0	0	0	0	0	0	0	0	0	0	0	0	0	0	0	0	0	0	0	0	0	0	0	0	29.4887	38.0761	38.8862	44.7192	48.4458	52.1723	56.0072	74.1019	84.4417	87.0266	80.9951
162	NCL	New Caledonia	0	0	0	0	0	0	0	0	0	0	0	0	0	0	0	0	0	0	0	0	0	0	0	0	0	0	0	0	0	0	0	0	0	0	0	0	0	0	0	0	0	0	0	0	0	49.9757	62.9004
163	PNG	Papua New Guineae	0	0	0	0	0	0	0	0	0	0	0	0	0	0	0	0	0	0	0	0	0	0	0	0	0	0	0	0	0	0	0	0	0	0	0	0	0	0	0	0	0	0	0	0	0	0	0
	UNFCCC. National Inventory Submission 2023. Available at: https://unfccc.int/ghg-inventories-annex-i-parties/2023. (last accessed: 9 July 2024)
	Andrew, R. M. Global CO2 emissions from cement production. Earth Syst. Sci. Data 10, 195–217 (2018). https://doi.org/10.5194/essd-10-195-2018.
[truncated: 50 more columns]
