# Supplementary material for: Global and national CO 2 uptake by cement carbonation from 1928 to 2024
Source: Copernicus journal article supplement (doi:10.5194/essd-17-2231-2025), 2025-05-27
Supplement: Supplementary file 1 [file essd-17-2231-2025-supplement.zip]

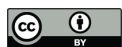

## *Supplement of*

# **Global and national CO<sub>2</sub> uptake by cement carbonation from 1928 to 2024**

**Le Niu et al.**

*Correspondence to:* Fengming Xi (xifengming@ustb.edu.cn)

- [essd-17-2231-2025-supplement-title-page.pdf](#)
- [Table S1-Activity-level data of cement clinker production and consumption.xlsx](#)
- [Table S2-Input model parameters of cement uptakes and emissions.xlsx](#)
- [Table S3-Results for cement carbon uptakes and emissions.xlsx](#)
- [Table S4-Uncertainty of cement carbon uptakes.xlsx](#)

The copyright of individual parts of the supplement might differ from the article licence.
