# Supplementary material for: Global and national CO 2 uptake by cement carbonation from 1928 to 2024
Source: Copernicus journal article supplement (doi:10.5194/essd-17-2231-2025), 2025-05-27
Supplement: Supplementary file 3 [file Table S2-Input model parameters of cement uptakes and emissions.xlsx]

## Sheet: Summary
Table S2: Input model parameters of cement uptakes and emissions
Index	Name	Parameters	Area	Source
SI data 1	The proportion of cement used for concrete and mortar in world countries/regions	cement usage ratio	44 countries and regions	1) European Ready mixed Concrete Organization (ERMCO): Ready-mixed Concrete Industry Statistics 2001–2019. European Ready mixed Concrete Organization [data set], 2020. https://ermco.eu/statistics-previous-years/ 2) USGS. Cement Statistics and Information. http://minerals.usgs.gov/minerals/pubs/commodity/cement/index.html. 3 Overview of cement and concrete production in Latin America and the Carib…
SI data 2	The strength class distribution of concrete by regions	concrete strength class ditribution	44 countries and regions	1) EMRCO (European Ready Mixed Concrete Organization). Ready-Mixed Concrete Industry Statistics 2008-2019. http://www.ermco.eu. 2) Xi, F., Davis, S. J., Ciais, P., Crawford-Brown, D., Guan, D., Pade, C., Shi, T., Syddall, M., Lv, J., Ji, L., Bing, L., Wang, J., Wei, W., Yang, K. H., Lagerblad, B., Galan, I., Andrade, C., Zhang, Y. and Liu, Z.: Substantial global carbon uptake by cement carbonatio…
SI data 3	Distribution of cement content of concrete by strength class	cement content of concrete	global	1) M.S. Material flow analysis of concrete in the United States, Massachusetts Institute of Technology, http://dspace.mit.edu/bitstream/1721.1/33030/2/62096322-MIT.pdf,2005. 2) EMRCO (European Ready Mixed Concrete Organization). Ready-Mixed Concrete Industry Statistics 2008-2019. http://www.ermco.eu. 3) Pade, C. and Guimaraes, M.: The CO2 uptake of concrete in a 100 year perspective, Cem. Concr. …
SI data 4	Concrete carbonation rate coefficients (k) by regions	concrete carbonation rate coefficients	Europe, China and USA	1) Nordic countries. Pade, C. and M. Guimaraes (2007). "The CO2 uptake of concrete in a 100 year perspective. Cement and concrete research 37(9): 1348-1356. 2) Cement concrete carbonation coefficients in China are derived from more than 1300 concrete samples all over the China. 3) Gajda, John, Absorption of Atmospheric Carbon Dioxide by Portland Cement Concrete, R&D Serial No. 2255a, Portland Cem…
SI data 5	Exposure times of cement materials in life cycle by regions	exposure times	44 countries and regions	1) Pommer, K., Pade, C., Institut, D. T. & Centre, N. I. Guidelines: Uptake of Carbon Dioxide in the Life Cycle Inventory of Concrete. 2006. 2) Mequignon, M., Ait Haddou, H., Thellier, F., Bonhomme, M.: Greenhouse gases and building lifetimes. Build.Environ., 68, 77-86, doi:http://dx.doi.org/10.1016/j.buildenv.2013.05.017, 2013. 3) Kapur, A., Keoleian, G., Kendall, A. & Kesler, S. E. Dynamic Mode…
SI data 6	Waste concrete treatment methods and particle size distribution by regions	particle size distribution	Europe, China and USA	1) Pade, C. and Guimaraes, M.: The CO2 uptake of concrete in a 100 year perspective, Cem. Concr. Res., 37(9), 1348–1356, doi:10.1016/j.cemconres.2007.06.009, 2007. 2) Engelsen, C. J., Mehus, J., Pade, C., Sæther, D. H.: Carbon dioxide uptake in demolished and crushed concrete. Norwegian Building Research Institute, www. byggforsk. no, ISBN, 82-536, 2005. 3) Carbon Dioxide Uptake in Demolished and…
SI data 7	Concrete structure thickness by regions	Concrete structure thickness	Europe, China and USA	1) Gajda, J.: Absorption of Atmospheric Carbon Dioxide by Portland Cement,Skokie, IL: Portland Cement Association (PCA) , 2001. 2) China Building Industry Press. Concrete structure middle volume concrete structure and masonry structure design Fifth Edition. 3) Pade, C. and Guimaraes, M.: The CO2 uptake of concrete in a 100 year perspective, Cem. Concr. Res., 37(9), 1348–1356, doi:10.1016/j.cemcon…
SI data 8	Distribution of mortar uses and related parameters	mortar usages	global	Xi, F., Davis, S. J., Ciais, P., Crawford-Brown, D., Guan, D., Pade, C., Shi, T., Syddall, M., Lv, J., Ji, L., Bing, L., Wang, J., Wei, W., Yang, K. H., Lagerblad, B., Galan, I., Andrade, C., Zhang, Y. and Liu, Z.: Substantial global carbon uptake by cement carbonation, Nat. Geosci., 9(12), 880–883, doi:10.1038/ngeo2840, 2016.
SI data 9	The thickness of different cement mortar utilization types	mortar thickness	global	1) Lutz H, Bayer R.: Dry mortars. Ullmann'sencyclopedia of industrial chemistry , https://doi.org/10.1002/14356007.f16_f01.pub2|(Accessed 25 Augst 2020),2010 2) Winter C, Plank J.: The European dry-mix mortar industr (Part 1).ZKG International, 60,62, https://www.zhangqiaokeyan.com/academic-journal-foreign_other_thesis/020416025873.html(Accessed 25 Augst 2020),2007
SI data 10	Chinese survey statistics for walls with various extents of mortar rendering	walls with various extents of mortar rendering	global	Xi, F., Davis, S. J., Ciais, P., Crawford-Brown, D., Guan, D., Pade, C., Shi, T., Syddall, M., Lv, J., Ji, L., Bing, L., Wang, J., Wei, W., Yang, K. H., Lagerblad, B., Galan, I., Andrade, C., Zhang, Y. and Liu, Z.: Substantial global carbon uptake by cement carbonation, Nat. Geosci., 9(12), 880–883, doi:10.1038/ngeo2840, 2016.
SI data 11	Mortar carbonation rate coefficients and CaO converted to CaCO3	mortar carbonation rate coefficients	global	Xi, F., Davis, S. J., Ciais, P., Crawford-Brown, D., Guan, D., Pade, C., Shi, T., Syddall, M., Lv, J., Ji, L., Bing, L., Wang, J., Wei, W., Yang, K. H., Lagerblad, B., Galan, I., Andrade, C., Zhang, Y. and Liu, Z.: Substantial global carbon uptake by cement carbonation, Nat. Geosci., 9(12), 880–883, doi:10.1038/ngeo2840, 2016.
SI data 12	Cement carbon emissions factors for 42 countries and ROW, 1928-2023	carbon emissions factors	42 countries and regions	1) UNFCCC. National Inventory Submission 2023. Available at: https://unfccc.int/ghg-inventories-annex-i-parties/2023. (last accessed: 9 July 2024) 2) The Global Cement Directory 2020 Global Cement Directory - listing of all global cement plants from Global Cement https://www.globalcement.com/directory 3) The default value of 0.507 kg CO₂ t-1 clinker recommended by the IPCC (EFDB, 2003). 4) Shen,L…

## Sheet: SI data1
SI data 1. The proportion of cement used for concrete and mortar in world countries/regions
code	ISO	countries/regions	Cement for concrete (Max)	Cement for concrete (Min)	Cement for mortar (Max)	Cement for mortar (Min)	Cement for concrete (Average)	Cement for mortar (Average)	note
1	AUT	Austria	0.866667	0.709091	0.290909	0.133333	0.786536	0.213464
2	BEL	Belgium	0.999844	0.748485	0.251515	0.00015625	0.893853	0.106147
3	BGR	Bulgaria	0.877682	0.608922	0.391078	0.122318	0.715939	0.284061	as ERMCO
4	HRV	Croatia	0.877682	0.608922	0.391078	0.122318	0.715939	0.284061	as ERMCO
5	CYP	Cyprus	0.877682	0.608922	0.391078	0.122318	0.715939	0.284061	as ERMCO
6	CZE	Czechia	0.996154	0.68	0.32	0.00384615	0.827225	0.172775
7	DNK	Denmark	0.883077	0.400833	0.599167	0.116923	0.700452	0.299548
8	FIN	Finland	0.835263	0.726316	0.273684	0.164737	0.784197	0.215803
9	FRA	France	0.865161	0.803734	0.196266	0.134839	0.826715	0.173285
10	DEU	Germany	0.876651	0.750611	0.249389	0.123349	0.820652	0.179348
11	GRC	Greece	0.9	0.7125	0.2875	0.1	0.784615	0.215385
12	HUN	Hungary	0.877682	0.608922	0.391078	0.122318	0.715939	0.284061	as ERMCO
13	IRL	Ireland	0.941538	0.606667	0.393333	0.0584615	0.750564	0.249436
14	ITA	Italy	0.75622	0.550538	0.449462	0.24378	0.665466	0.334534
15	LUX	Luxembourg	0.877682	0.608922	0.391078	0.122318	0.715939	0.284061	as ERMCO
16	NLD	Netherlands	0.977864	0.307843	0.692157	0.0221364	0.801508	0.198492
17	NOR	Norway	0.974842	0.933882	0.0661176	0.0251579	0.956894	0.0431062
18	POL	Poland	0.889076	0.58805	0.41195	0.110924	0.67969	0.32031
19	PRT	Portugal	0.729167	0.4125	0.5875	0.270833	0.5698	0.4302
20	ROU	Romania	0.877682	0.608922	0.391078	0.122318	0.715939	0.284061	as ERMCO
21	SVK	Slovakia	0.611471	0.352333	0.647667	0.388529	0.49736	0.50264
22	SVN	Slovenia	0.877682	0.608922	0.391078	0.122318	0.715939	0.284061	as ERMCO
23	ESP	Spain	0.85	0.455597	0.544403	0.15	0.736696	0.263304
24	SWE	Sweden	0.859091	0.756	0.244	0.140909	0.807692	0.192308
25	CHE	Switzerland	0.6776	0.639245	0.360755	0.3224	0.664314	0.335686
26	TUR	Türkiye	0.56003	0.527913	0.472087	0.43997	0.550097	0.449903
27	GBR	United Kingdom	0.905882	0.712121	0.287879	0.0941176	0.797637	0.202363
28	CAN	Canada	0.877682	0.608922	0.391078	0.122318	0.715939	0.284061	as ERMCO
29	USA	USA	0.894056	0.689369	0.295643	0.0909062	0.859835	0.125167
30	MEX	Mexico	0.65	0.55	0.45	0.35	0.6	0.4	as Brazil
31	BRA	Brazil	0.65	0.55	0.45	0.35	0.6	0.4
32	EGY	Egypt	0.933333	0.63	0.37	0.0666667	0.822222	0.177778	as South Africa
33	ZAF	South Africa	0.933333	0.63	0.37	0.0666667	0.822222	0.177778
34	IRN	Iran	0.883123	0.288475	0.711525	0.116877	0.800587	0.199413	as India
35	SAU	Saudi Arabia	0.883123	0.288475	0.711525	0.116877	0.800587	0.199413	as India
36	IND	India	0.883123	0.288475	0.711525	0.116877	0.800587	0.199413
37	CHN	China	0.711589	0.670653	0.32266	0.273411	0.693401	0.291599
38	JPN	Japan	0.98725	0.770728	0.229272	0.01275	0.861136	0.138864
39	KOR	South Korea	0.98725	0.770728	0.229272	0.01275	0.861136	0.138864	as Japan
40	IDN	Indonesia	0.902165	0.508591	0.396963	0.188043	0.661081	0.338919	as Thailand
41	VNM	Vietnam	0.902165	0.508591	0.396963	0.188043	0.661081	0.338919	as Thailand
42	AUS	Australia	0.877682	0.608922	0.391078	0.122318	0.715939	0.284061	as ERMCO
43	RUS	Russia	0.505556	0.342295	0.657705	0.494444	0.409009	0.590991
44	THA	Thailand	0.902165	0.508591	0.396963	0.188043	0.661081	0.338919
	from European Ready mixed Concrete Organization (ERMCO): Ready-mixed Concrete Industry Statistics 2001–2019. European Ready mixed Concrete Organization [data set], 2020. https://ermco.eu/statistics-previous-years/ (last access: 24 August 2024).
	from USGS (USGS. Cement Statistics and Information. ttp://minerals.usgs.gov/minerals/pubs/commodity/cement/index.html)
	Overview of cement and concrete production in Latin America and the Caribbean with a focus on the goals of reaching carbon neutrality.2022
	Muigai, R. et al. Cradle-to-gate environmental impacts of the concrete industry in South Africa. J. South Afr. Inst. Civil Eng. 55, 02–07 (2013).
	Kumar, P. & Kaushik, S. Some trends in the use of concrete: Indian scenario. Cement Concr. Res. 33, 77. https://doi.org/10.1016/S0008-8846(02)00935-7 (2003).
	from field servey. Xi, F., Davis, S. J., Ciais, P., Crawford-Brown, D., Guan, D., Pade, C., Shi, T., Syddall, M., Lv, J., Ji, L., Bing, L., Wang, J., Wei, W., Yang, K. H., Lagerblad, B., Galan, I., Andrade, C., Zhang, Y. and Liu, Z.: Substantial global carbon uptake by cement carbonation, Nat. Geosci., 9(12), 880–883, doi:10.1038/ngeo2840, 2016.
	Limsuwan, E. Thailand – Concrete Construction Industry – Cement Based Material and Civil Infrastructure (CBM-CI). Proc. CBM-CI International Workshop, Karachi, Pakistan (2007).

## Sheet: SI data2
SI data 2. The strength class distribution of concrete by regions
ISO	Name	strength	Distribution Pattern	a	b	max	min	note
AUS	Austria	≤C15 (%)	weibull	0.0695833	12	0.096	0.05			name
		C16-C23 (%)	weibull	0.246083	12	0.5	0.137				ERMCO. (European Ready Mixed Concrete Organization) Ready-Mixed Concrete Industry Statistics 2008-2019, Available at (http://www.ermco.eu).
		C24-C35 (%)	weibull	0.6525	16	0.729	0.4				data is from 1144 survey projects.Xi, F., Davis, S. J., Ciais, P., Crawford-Brown, D., Guan, D., Pade, C., Shi, T., Syddall, M., Lv, J., Ji, L., Bing, L., Wang, J., Wei, W., Yang, K. H., Lagerblad, B., Galan, I., Andrade, C., Zhang, Y. and Liu, Z.: Substantial global carbon uptake by cement carbonation, Nat. Geosci., 9(12), 880–883, doi:10.1038/ngeo2840, 2016..
		>C35 (%)	weibull	0.0590833	12	0.08	0.045				CEIC: https://www.ceicdata.com.cn/zh-hans/countries
ISO	Name	strength	Distribution Pattern	a	b	max	min
BEL	Belgium	≤C15 (%)	weibull	0.00583333	12	0.02	0
		C16-C23 (%)	weibull	0.0890833	12	0.1	0.04
		C24-C35 (%)	weibull	0.58675	16	0.77	0.54
		>C35 (%)	weibull	0.309167	12	0.36	0.18
ISO	Name	strength	Distribution Pattern	a	b	max	min
	Bulgaria	≤C15 (%)	weibull	0.055	12	0.08	0.029	as ERMCO
		C16-C23 (%)	weibull	0.407	12	0.54	0.189
		C24-C35 (%)	weibull	0.468	16	0.629	0.32
		>C35 (%)	weibull	0.109	12	0.135	0.08
ISO	Name	strength	Distribution Pattern	a	b	max	min
	Croatia	≤C15 (%)	weibull	0.055	12	0.08	0.029	as ERMCO
		C16-C23 (%)	weibull	0.407	12	0.54	0.189
		C24-C35 (%)	weibull	0.468	16	0.629	0.32
		>C35 (%)	weibull	0.109	12	0.135	0.08
ISO	Name	strength	Distribution Pattern	a	b	max	min
	Cyprus	≤C15 (%)	weibull	0.055	12	0.08	0.029	as ERMCO
		C16-C23 (%)	weibull	0.407	12	0.54	0.189
		C24-C35 (%)	weibull	0.468	16	0.629	0.32
		>C35 (%)	weibull	0.109	12	0.135	0.08
ISO	Name	strength	Distribution Pattern	a	b	max	min
CZE	Czechia	≤C15 (%)	weibull	0.17	12	0.21	0.15
		C16-C23 (%)	weibull	0.301818	16	0.36	0.26
		C24-C35 (%)	weibull	0.333636	16	0.37	0.29
		>C35 (%)	weibull	0.194545	16	0.23	0.15
ISO	Name	strength	Distribution Pattern	a	b	max	min
DNK	Denmark	≤C15 (%)	weibull	0.0609091	12	0.1	0.04
		C16-C23 (%)	weibull	0.398182	12	0.55	0.3
		C24-C35 (%)	weibull	0.36	16	0.4	0.3
		>C35 (%)	weibull	0.180909	12	0.28	0.05
ISO	Name	strength	Distribution Pattern	a	b	max	min
FIN	Finland	≤C15 (%)	weibull	0.0216667	12	0.1	0
		C16-C23 (%)	weibull	0.15	12	0.25	0.06
		C24-C35 (%)	weibull	0.661667	12	0.82	0.55
		>C35 (%)	weibull	0.165833	12	0.35	0.1
ISO	Name	strength	Distribution Pattern	a	b	max	min
FRA	France	≤C15 (%)	weibull	0.0133333	12	0.02	0.005
		C16-C23 (%)	weibull	0.320833	12	0.68	0.06
		C24-C35 (%)	weibull	0.5825	12	0.82	0.27
		>C35 (%)	weibull	0.0833333	12	0.12	0.03
ISO	Name	strength	Distribution Pattern	a	b	max	min
DEU	Germany	≤C15 (%)	weibull	0.0833333	12	0.11	0.065
		C16-C23 (%)	weibull	0.201333	12	0.29	0.158
		C24-C35 (%)	weibull	0.575	16	0.613	0.49
		>C35 (%)	weibull	0.140333	12	0.184	0.11
ISO	Name	strength	Distribution Pattern	a	b	max	min
GRC	Greece	≤C15 (%)	weibull	0.0366667	16	0.05	0.02
		C16-C23 (%)	weibull	0.77	16	0.88	0.7
		C24-C35 (%)	weibull	0.173333	12	0.22	0.1
		>C35 (%)	weibull	0.02	12	0.03	0
ISO	Name	strength	Distribution Pattern	a	b	max	min
	Hungary	≤C15 (%)	weibull	0.055	12	0.08	0.029	as ERMCO
		C16-C23 (%)	weibull	0.407	12	0.54	0.189
		C24-C35 (%)	weibull	0.468	16	0.629	0.32
		>C35 (%)	weibull	0.109	12	0.135	0.08
ISO	Name	strength	Distribution Pattern	a	b	max	min
IRL	Ireland	≤C15 (%)	weibull	0.055	12	0.08	0.029	as ERMCO
		C16-C23 (%)	weibull	0.407	12	0.54	0.189
		C24-C35 (%)	weibull	0.468	16	0.629	0.32
		>C35 (%)	weibull	0.109	12	0.135	0.08
ISO	Name	strength	Distribution Pattern	a	b	max	min
ITA	Italy	≤C15 (%)	weibull	0.0608333	12	0.08	0
		C16-C23 (%)	weibull	0.2175	12	0.42	0.15
		C24-C35 (%)	weibull	0.679167	16	0.75	0.54
		>C35 (%)	weibull	0.0425	12	0.08	0.03
ISO	Name	strength	Distribution Pattern	a	b	max	min
	Luxembourg	≤C15 (%)	weibull	0.055	12	0.08	0.029	as ERMCO
		C16-C23 (%)	weibull	0.407	12	0.54	0.189
		C24-C35 (%)	weibull	0.468	16	0.629	0.32
		>C35 (%)	weibull	0.109	12	0.135	0.08
ISO	Name	strength	Distribution Pattern	a	b	max	min
NLD	Netherlands	≤C15 (%)	weibull	0.0229167	12	0.09	0.01
		C16-C23 (%)	weibull	0.46125	12	0.66	0.11
		C24-C35 (%)	weibull	0.3675	12	0.55	0.25
		>C35 (%)	weibull	0.140417	12	0.55	0.03
ISO	Name	strength	Distribution Pattern	a	b	max	min
NOR	Norway	≤C15 (%)	weibull	0.000333333	12	0.002	0
		C16-C23 (%)	weibull	0.042	12	0.077	0.01
		C24-C35 (%)	weibull	0.588917	16	0.82	0.425
		>C35 (%)	weibull	0.368833	12	0.543	0.11
ISO	Name	strength	Distribution Pattern	a	b	max	min
POL	Poland	≤C15 (%)	weibull	0.128083	12	0.16	0.1
		C16-C23 (%)	weibull	0.242833	12	0.34	0.154
		C24-C35 (%)	weibull	0.484667	16	0.6	0.32
		>C35 (%)	weibull	0.147	12	0.272	0.07
ISO	Name	strength	Distribution Pattern	a	b	max	min
PRT	Portugal	≤C15 (%)	weibull	0.0533333	12	0.12	0
		C16-C23 (%)	weibull	0.358083	12	0.57	0.2
		C24-C35 (%)	weibull	0.488083	12	0.716	0.1
		>C35 (%)	weibull	0.0740833	12	0.2	0.035
ISO	Name	strength	Distribution Pattern	a	b	max	min
	Romania	≤C15 (%)	weibull	0.055	12	0.08	0.029	as ERMCO
		C16-C23 (%)	weibull	0.407	12	0.54	0.189
		C24-C35 (%)	weibull	0.468	16	0.629	0.32
		>C35 (%)	weibull	0.109	12	0.135	0.08
ISO	Name	strength	Distribution Pattern	a	b	max	min
SVK	Slovakia	≤C15 (%)	weibull	0.16	12	0.24	0.07
		C16-C23 (%)	weibull	0.229167	16	0.28	0.17
		C24-C35 (%)	weibull	0.48	16	0.71	0.34
		>C35 (%)	weibull	0.130833	12	0.22	0.05
ISO	Name	strength	Distribution Pattern	a	b	max	min
	Slovenia	≤C15 (%)	weibull	0.055	12	0.08	0.029	as ERMCO
		C16-C23 (%)	weibull	0.407	12	0.54	0.189
		C24-C35 (%)	weibull	0.468	16	0.629	0.32
		>C35 (%)	weibull	0.109	12	0.135	0.08
ISO	Name	strength	Distribution Pattern	a	b	max	min
ESP	Spain	≤C15 (%)	weibull	0.0527273	12	0.08	0
		C16-C23 (%)	weibull	0.100909	12	0.71	0
		C24-C35 (%)	weibull	0.786364	12	0.95	0.21
		>C35 (%)	weibull	0.06	12	0.1	0.02
ISO	Name	strength	Distribution Pattern	a	b	max	min
SWE	Sweden	≤C15 (%)	weibull	0.055	12	0.08	0.029	as ERMCO
		C16-C23 (%)	weibull	0.407	12	0.54	0.189
		C24-C35 (%)	weibull	0.468	16	0.629	0.32
		>C35 (%)	weibull	0.109	12	0.135	0.08
ISO	Name	strength	Distribution Pattern	a	b	max	min
	Switzerland	≤C15 (%)	weibull	0.055	12	0.08	0.029	as ERMCO
		C16-C23 (%)	weibull	0.407	12	0.54	0.189
		C24-C35 (%)	weibull	0.468	16	0.629	0.32
		>C35 (%)	weibull	0.109	12	0.135	0.08
ISO	Name	strength	Distribution Pattern	a	b	max	min
TUR	Türkiye	≤C15 (%)	weibull	0.015	12	0.04	0
		C16-C23 (%)	weibull	0.228333	12	0.63	0.045
		C24-C35 (%)	weibull	0.612083	16	0.78	0.25
		>C35 (%)	weibull	0.144583	12	0.255	0.04
ISO	Name	strength	Distribution Pattern	a	b	max	min
GBR	United Kingdom	≤C15 (%)	weibull	0.055	12	0.08	0.029	as ERMCO
		C16-C23 (%)	weibull	0.407	12	0.54	0.189
		C24-C35 (%)	weibull	0.468	16	0.629	0.32
		>C35 (%)	weibull	0.109	12	0.135	0.08
ISO	Name	strength	Distribution Pattern	a	b	max	min
	Canada	≤C15 (%)	weibull	0.055	12	0.08	0.029	as ERMCO
		C16-C23 (%)	weibull	0.407	12	0.54	0.189
		C24-C35 (%)	weibull	0.468	16	0.629	0.32
		>C35 (%)	weibull	0.109	12	0.135	0.08
ISO	Name	strength	Distribution Pattern	a	b	max	min
	USA	≤C15 (%)	weibull	0.3125	12	0.4	0.05
		C16-C23 (%)	weibull	0.3375	12	0.6	0.25
		C24-C35 (%)	weibull	0.2375	16	0.25	0.2
		>C35 (%)	weibull	0.1125	12	0.15	0.1
ISO	Name	strength	Distribution Pattern	a	b	max	min
	Mexico	≤C15 (%)	weibull	0.0332533	16	0.037588	0.0289186	as Brazil
		C16-C23 (%)	weibull	0.232773	16	0.263116	0.20243
		C24-C35 (%)	weibull	0.261189	16	0.294075	0.228303
		>C35 (%)	weibull	0.473381	12	0.540348	0.406414
ISO	Name	strength	Distribution Pattern	a	b	max	min
	Brazil	≤C15 (%)	weibull	0.0332533	16	0.037588	0.0289186
		C16-C23 (%)	weibull	0.232773	16	0.263116	0.20243
		C24-C35 (%)	weibull	0.261189	16	0.294075	0.228303
		>C35 (%)	weibull	0.473381	12	0.540348	0.406414
ISO	Name	strength	Distribution Pattern	a	b	max	min
	Egypt	≤C15 (%)	weibull	0.089279	16	0.10933	0.0518458
		C16-C23 (%)	weibull	0.624953	12	0.765313	0.362921
		C24-C35 (%)	weibull	0.113328	12	0.443659	0.00192785
		>C35 (%)	weibull	0.172439	12	0.302454	0.122301
ISO	Name	strength	Distribution Pattern	a	b	max	min
	South Africa	≤C15 (%)	weibull	0.062777	16	0.0848306	0.0427762
		C16-C23 (%)	weibull	0.439439	12	0.593814	0.299433
		C24-C35 (%)	weibull	0.237873	12	0.4876	0.115124
		>C35 (%)	weibull	0.25991	12	0.493301	0.0763292
ISO	Name	strength	Distribution Pattern	a	b	max	min
	Iran	≤C15 (%)	weibull	0.0940069	16	0.100577	0.0854706	as Saudi
		C16-C23 (%)	weibull	0.658048	16	0.70404	0.598294
		C24-C35 (%)	weibull	0.154774	12	0.202833	0.112865
		>C35 (%)	weibull	0.0931711	12	0.156974	0.060551
ISO	Name	strength	Distribution Pattern	a	b	max	min
	Saudi Arabia	≤C15 (%)	weibull	0.0940069	16	0.100577	0.0854706
		C16-C23 (%)	weibull	0.658048	16	0.70404	0.598294
		C24-C35 (%)	weibull	0.154774	12	0.202833	0.112865
		>C35 (%)	weibull	0.0931711	12	0.156974	0.060551
ISO	Name	strength	Distribution Pattern	a	b	max	min
	India	≤C15 (%)	weibull	0.118741	16	0.123971	0.107564
		C16-C23 (%)	weibull	0.831189	16	0.867796	0.752951
		C24-C35 (%)	weibull	0.0208503	12	0.07111	0.00226853
		>C35 (%)	weibull	0.0292195	12	0.068375	0.00588057
ISO	Name	strength	Distribution Pattern	a	b	max	min
	China	≤C15 (%)	weibull	0.165	4	0.335	0
		C16-C23 (%)	weibull	0.137	4	0.258	0
		C24-C35 (%)	weibull	0.66	8	0.828	0.416
		>C35 (%)	weibull	0.116	4	0.234	0
ISO	Name	strength	Distribution Pattern	a	b	max	min
	South Korea	≤C15 (%)	weibull	0.055	12	0.08	0.029	as ERMCO
		C16-C23 (%)	weibull	0.407	12	0.54	0.189
		C24-C35 (%)	weibull	0.468	16	0.629	0.32
		>C35 (%)	weibull	0.109	12	0.135	0.08
ISO	Name	strength	Distribution Pattern	a	b	max	min
	Japan	≤C15 (%)	weibull	0.00333333	12	0.01	0
		C16-C23 (%)	weibull	0.367778	12	0.43	0.34
		C24-C35 (%)	weibull	0.447778	16	0.5	0.32
		>C35 (%)	weibull	0.181111	12	0.26	0.13
ISO	Name	strength	Distribution Pattern	a	b	max	min
	Vietnam	≤C15 (%)	weibull	0.072787	16	0.084976	0.0603642	as Malaysia and Thailand
		C16-C23 (%)	weibull	0.509509	12	0.594832	0.422549
		C24-C35 (%)	weibull	0.182944	12	0.239141	0.11385
		>C35 (%)	weibull	0.234761	12	0.351111	0.14376
ISO	Name	strength	Distribution Pattern	a	b	max	min
	Indonesia	≤C15 (%)	weibull	0.072787	16	0.084976	0.0603642	as Malaysia and Thailand
		C16-C23 (%)	weibull	0.509509	12	0.594832	0.422549
		C24-C35 (%)	weibull	0.182944	12	0.239141	0.11385
		>C35 (%)	weibull	0.234761	12	0.351111	0.14376
ISO	Name	strength	Distribution Pattern	a	b	max	min
	Australia	≤C15 (%)	weibull	0.055	12	0.08	0.029	as ERMCO
		C16-C23 (%)	weibull	0.407	12	0.54	0.189
		C24-C35 (%)	weibull	0.468	16	0.629	0.32
		>C35 (%)	weibull	0.109	12	0.135	0.08
ISO	Name	strength	Distribution Pattern	a	b	max	min
	EMRCO	≤C15 (%)	weibull	0.055	12	0.08	0.029
		C16-C23 (%)	weibull	0.407	12	0.54	0.189
		C24-C35 (%)	weibull	0.468	16	0.629	0.32
		>C35 (%)	weibull	0.109	12	0.135	0.08
ISO	Name	strength	Distribution Pattern	a	b	max	min
	Malaysia	≤C15 (%)	weibull	0.0786384	16	0.0934006	0.0576311
		C16-C23 (%)	weibull	0.550469	12	0.653804	0.403417
		C24-C35 (%)	weibull	0.140747	12	0.236637	0.0388916
		>C35 (%)	weibull	0.230146	12	0.44096	0.088739
ISO	Name	strength	Distribution Pattern	a	b	max	min
	Thailand	≤C15 (%)	weibull	0.0669356	16	0.0765513	0.0630973
		C16-C23 (%)	weibull	0.468549	12	0.535859	0.441681
		C24-C35 (%)	weibull	0.22514	12	0.241644	0.188808
		>C35 (%)	weibull	0.239375	12	0.261261	0.198781
ISO	Name	strength	Distribution Pattern	a	b	max	min
	The United Arab Emirates	≤C15 (%)	weibull	0.105599	16	0.112453	0.100163
		C16-C23 (%)	weibull	0.739192	16	0.787173	0.701144
		C24-C35 (%)	weibull	0.106197	12	0.142817	0.0707656
		>C35 (%)	weibull	0.0490121	16	0.0655265	0.028307
ISO	Name	strength	Distribution Pattern	a	b	max	min
	Russia	≤C15 (%)	weibull	0.0545455	12	0.1	0.05
		C16-C23 (%)	weibull	0.231818	12	0.4	0.05
		C24-C35 (%)	weibull	0.545455	12	0.7	0.4
		>C35 (%)	weibull	0.168182	16	0.2	0.15
ISO	Name	strength	Distribution Pattern	a	b	max	min
	Israel	≤C15 (%)	weibull	0.007	16	0.02	0
		C16-C23 (%)	weibull	0.06	12	0.1	0.02
		C24-C35 (%)	weibull	0.702	16	0.72	0.68
		>C35 (%)	weibull	0.231	12	0.3	0.2

## Sheet: SI data3
SI data 3. Distribution of cement content of concrete by strength class*
strength	Distribution Pattern	cement content(kg/m3)
		max	min
≤C15	uniform	288	165
C16-C23	uniform	390	240
C24-C35	uniform	400	280
>C35	uniform	670	300
*Low, M.S.: Material flow analysis of concrete in the United States, Massachusetts Institute of Technology, http://dspace.mit.edu/bitstream/1721.1/33030/2/62096322-MIT.pdf,2005.
ERMCO (European Ready Mixed Concrete Organization) Ready-Mixed Concrete Industry Statistics 2001-2013, Available at (http://www.ermco.eu).
Pade, C. and Guimaraes, M.: The CO2 uptake of concrete in a 100 year perspective, Cem. Concr. Res., 37(9), 1348–1356, doi:10.1016/j.cemconres.2007.06.009, 2007.
Construction and Installation Engineering Budget Manual and Concrete Mix Proportion Quick Manual

## Sheet: SI data4
SI data 4. Concrete carbonation rate coefficients (k) by regions
Concrete carbonation rate coefficients (K) for various concrete strengths and exposure conditions in Europe
Region	Exposure condition	Compressive strength (mm/(year)0.5)
Europe (Plain concrete)*	k	≤15 MPa	16–20 Mpa	23–35 Mpa	>35MPa
	Exposed outdoor	5	2.5	1.5	1
	Sheltered	10	6	4	2.5
	Indoors	15	9	6	3.5
	Wet	2	1	0.75	0.5
	Buried	3	1.5	1	0.75
China (Plain concrete)**	Exposed outdoor	6.1	3.9	2.4	1.3
	Sheltered	9.9	7.1	4.8	2.5
	Indoors	13.9	9.8	7	4
	Buried	3.8	1.9	1	0.5
	Wet	1.9	1	0.7	0.3
USA***	uncoated	7.1	6.9	3.8-5.4	2.5
	Coated	n/a	3.5	1.9-2.7	n/a
*The parameter is for plain concrete in Nordic countries. Pade, C. and M. Guimaraes (2007). "The CO2 uptake of concrete in a 100 year perspective." Cement and concrete research 37(9): 1348-1356.
** Cement concrete carbonation coefficients in China are derived from more than 1300 concrete samples all over the China.
***Gajda, John, Absorption of Atmospheric Carbon Dioxide by Portland Cement Concrete, R&D Serial No. 2255a, Portland Cement Association, Skokie, Illinois, USA, 2001, 22 pages.
Concrete carbonation rate coefficients (K) for different powder additions to be mutiplied by the carbonation rate coefficients provided for concrete
Type of addition	Amount of addition(wt.%)*
	0-10%	10-20%	20-30%	30-40%	40-50%	60-80%
Limestone		1.05	1.1
Fly-ash		1.05		1.1
Silica-fume	1.05	1.1
GGBF-Slag	1.05	1.1	1.15	1.2	1.25	1.3
*wt.% is the weight percentage of addition in cement.
data from Pade, C. & Guimaraes, M. The CO2 uptake of concrete in a 100 year perspective. Cement and concrete research37, 1348-1356, doi:DOI 10.1016/j.cemconres.2007.06.009 (2007).
	Papadakis, V. G. Effect of supplementary cementing materials on concrete resistance against carbonation and chloride ingress. Cement and Concrete Research30, 291-299 (2000).
CO2 concentration and correction value under different environment
Location	CO2 concentration(ppm)	modified parameter*
Urban	625	1.2
Rual	300	1
Seaside	225	0.93
Industrial area	1200	1.41
Road	1200	1.41
Buried	3000	1
*The carbonation depth is in proportion to the square root of CO2 concentration
data from Papadakis, V. G., Vayenas, C. G. & Fardis, M. N. Experimental investigation and mathematical modeling of the concrete carbonation problem. Chemical Engineering Science46, 1333-1338 (1991).
	Yoon, I.-S., Çopuroğlu, O. & Park, K.-B. Effect of global climatic change on carbonation progress of concrete. Atmospheric Environment41, 7274-7285, doi:http://dx.doi.org/10.1016/j.atmosenv.2007.05.028 (2007).
Coating and cover and correction values under different environment
Coating and cover type	correction values
No coating and cover	1
Indoor concrete coating	0.7
Outdoor concrete coating	0.5
Infrastructure conctrete if painted	1
data from Gajda, J. Absorption of atmospheric carbon dioxide by portland cement concrete. PCA R & D Serial (2001).
	Pade, C. and Guimaraes, M.: The CO2 uptake of concrete in a 100 year perspective, Cem. Concr. Res., 37(9), 1348–1356, doi:10.1016/j.cemconres.2007.06.009, 2007.
	Lagerblad, B.: Carbon Dioxide Uptake During Concrete Life Cycle: State of the Art.Swedish Cement and Concrete Research Institute, ISBN 91-976070-0-2,2005.
	Andersson, R., Fridh, K., Stripple, H., Häglund, M.: Calculating CO2 uptake for existing concrete structures during and after service life. Environ. Sci.Technol.,47, 11625-11633,doi:10.1021/es401775w,2013.
	Zafeiropoulou, T., Rakanta, E.,Batis, G.: Performance evaluation of organic coatings against corrosion in reinforced cement mortars. Prog. Org. Coat.,72, 175-180, doi:10.1016/j.porgcoat.2011.04.005,2011.
	Saricimen, H., Maslehuddin, M., Iob, A., Eid, O. A.: Evaluation of a surface coating in retarding reinforcement corrosion. Constr. Build. Mater.,10, 507-513, doi:http://dx.doi.org/10.1016/0950-0618(96)00013-X,1996.

## Sheet: SI data5
SI data 5. Exposure times of cement materials in life cycle by regions
The average service life,demolition stage, and secondary use stage (years)in different countries
code	ISO	countries/regions	service life (average)	service life (range)	average demolition stage (range)**	average secondary use stage	assessment time	note
1	AUT	Austria	70	70 (50-90)	0.4 (0.1-0.7)	29.6	100	as ECE
2	BEL	Belgium	70	70 (50-90)	0.4 (0.1-0.7)	29.6	100	as ECE
3	BGR	Bulgaria	70	70 (50-90)	0.4 (0.1-0.7)	29.6	100	as ECE
4	HRV	Croatia	70	70 (50-90)	0.4 (0.1-0.7)	29.6	100	as ECE
5	CYP	Cyprus	70	70 (50-90)	0.4 (0.1-0.7)	29.6	100	as ECE
6	CZE	Czechia	70	70 (50-90)	0.4 (0.1-0.7)	29.6	100	as ECE
7	DNK	Denmark	70	70 (50-90)	0.4 (0.1-0.7)	29.6	100	as ECE
8	FIN	Finland	70	70 (50-90)	0.4 (0.1-0.7)	29.6	100	as ECE
9	FRA	France	70	70 (50-90)	0.4 (0.1-0.7)	29.6	100	as ECE
10	DEU	Germany	70	70 (50-90)	0.4 (0.1-0.7)	29.6	100	as ECE
11	GRC	Greece	70	70 (50-90)	0.4 (0.1-0.7)	29.6	100	as ECE
12	HUN	Hungary	70	70 (50-90)	0.4 (0.1-0.7)	29.6	100	as ECE
13	IRL	Ireland	70	70 (50-90)	0.4 (0.1-0.7)	29.6	100	as ECE
14	ITA	Italy	70	70 (50-90)	0.4 (0.1-0.7)	29.6	100	as ECE
15	LUX	Luxembourg	70	70 (50-90)	0.4 (0.1-0.7)	29.6	100	as ECE
16	NLD	Netherlands	70	70 (50-90)	0.4 (0.1-0.7)	29.6	100	as ECE
17	NOR	Norway	70	70 (50-90)	0.4 (0.1-0.7)	29.6	100	as ECE
18	POL	Poland	70	70 (50-90)	0.4 (0.1-0.7)	29.6	100	as ECE
19	PRT	Portugal	70	70 (50-90)	0.4 (0.1-0.7)	29.6	100	as ECE
20	ROU	Romania	70	70 (50-90)	0.4 (0.1-0.7)	29.6	100	as ECE
21	SVK	Slovakia	70	70 (50-90)	0.4 (0.1-0.7)	29.6	100	as ECE
22	SVN	Slovenia	70	70 (50-90)	0.4 (0.1-0.7)	29.6	100	as ECE
23	ESP	Spain	70	70 (50-90)	0.4 (0.1-0.7)	29.6	100	as ECE
24	SWE	Sweden	70	70 (50-90)	0.4 (0.1-0.7)	29.6	100	as ECE
25	CHE	Switzerland	70	70 (50-90)	0.4 (0.1-0.7)	29.6	100	as ECE
26	TUR	Türkiye	70	70 (50-90)	0.4 (0.1-0.7)	29.6	100	as ECE
27	GBR	United Kingdom	70	70 (50-90)	0.4 (0.1-0.7)	29.6	100	as ECE
28	CAN	Canada	50	50 (35-70)	0.4 (0.1-0.7)	49.6	100	as General assumption
29	USA	USA	65	65 (56-82)	0.4 (0.1-0.7)	34.6	100
30	MEX	Mexico	50	50 (35-70)	0.4 (0.1-0.7)	49.6	100	as General assumption
31	BRA	Brazil	75	75 (50-100)	0.4 (0.1-0.7)	24.6	100
32	EGY	Egypt	75	75 (50-100)	0.4 (0.1-0.7)	24.6	100	as s-Africa
33	ZAF	South Africa	75	75 (50-100)	0.4 (0.1-0.7)	24.6	100	as s-Africa
34	IRN	Iran	45	45 (40-50)	0.4 (0.1-0.7)	54.6	100	as Middle East
35	SAU	Saudi Arabia	45	45 (40-50)	0.4 (0.1-0.7)	54.6	100	as Middle East
36	IND	India	50	50 (35-70)	0.4 (0.1-0.7)	49.6	100	as General assumption
37	CHN	China	35	35 (4-73)	0.4 (0.1-0.8)	64.6	100
38	JPN	Japan	27	27 (25-30)	0.4 (0.1-0.7)	72.6	100
39	KOR	South Korea	21	21 (13-30)	0.4 (0.1-0.7)	78.6	100
40	IDN	Indonesia	23	23 (10-35)	0.4 (0.1-0.7)	76.6	100
41	VNM	Vietnam	50	50 (35-70)	0.4 (0.1-0.7)	49.6	100	as General assumption
42	AUS	Australia	50	50 (35-70)	0.4 (0.1-0.7)	49.6	100	as General assumption
	Pommer, K., Pade, C., Institut, D. T. & Centre, N. I. Guidelines: Uptake of Carbon Dioxide in the Life Cycle Inventory of Concrete. (Nordic Innovation Centre, 2006);Mequignon, M., Ait Haddou, H., Thellier, F., Bonhomme, M.: Greenhouse gases and building lifetimes. Build.Environ., 68, 77-86, doi:http://dx.doi.org/10.1016/j.buildenv.2013.05.017, 2013.
	Kapur, A., Keoleian, G., Kendall, A. & Kesler, S. E. Dynamic Modeling of In‐Use Cement Stocks in the United States. Journal of Industrial Ecology 12, 539-556 (2008).(as USA)
	Influence of concrete cover in the service life of a newly built reinforced concrete structure: a case study.2020.
	Comparing the whole life cycle carbon impact of conventional and biogenic building materials across major residential typologies in Ghana and Senegal
	Life cycle building impact of a Middle Eastern residential neighborhood ；https://www.argaam.com/en/article/articledetail/id/1503872. (Saudi)
	data is estimated based on the Chinese studies and field survey data
	Extending or ending the life of residential buildings in Japan: A social circular economy approach to the problem of short-lived constructions.2019；The efforts to develop longer life housing with adaptability in Japan.2016
	Building life-span prediction for life cycle assessment and life cycle cost using machine learning: A big data approach
	Life Cycle Assessment of Energy and CO2 Emissions for Residential Buildings in Jakarta and Bandung, Indonesia
	Systematic literature review of life cycle sustainability assessment system for residential buildings: using bibliometric analysis 2000–2020.(General assumption)
	Life cycle environmental assessment of an educational building in Northern India: A case study.2012（india-50year）
	Embodied and operational energy of urban residential buildings in India.2016（india-50year）
	Environmental Impact Analysis on Residential Building in Malaysia Using Life Cycle Assessment.2017（Malaysia-50year）
	Environmental life cycle assessment of a commercial office building in Thailand.2008 (Thailan-50year)
	An integrated life cycle assessment of diﬀerent façade systems for a typical residential building in Ghana.2020(Ghana-50year)

## Sheet: SI data6
SI data 6. Waste concrete treatment methods and particle size distribution by regions
Demolished and crushed concrete treatment	Particle size grading	particle size distribution in different regions (%)				Distribution type	Relation
		China (range)*	Europe (range)**	USA (range)***	Rest of world (range)****
RCA for new cement concrete	<5mm	14.9 (2.1-20.0)	29.4 (22.5-36.0)	29.4 (10.0-36.0)	24.1 (15.0-37.0)	Uniform	"<5mm"+"5-10mm"+"10-20mm"+"20-32mm" = 100%
	5-10mm	25.1 (17.5-41.2)	13.8 (12.5-15.0)	13.8(5.0-30.0)	17.0 (12.0-23.0)	Uniform
	11-20mm	40.6 (32.0-45.0)	39.2 (20.0-44.0)	39.2(20.0-44.0)	33.9(24.0-46.0)	Uniform
	21-32mm	19.4 (10.0-26.7)	17.6 (5.0-45.0)	17.6 (10.0-30.0)	25.0 (16.0-39.0)	Uniform
RCA for Road base materials and others	<1mm	11.7(5.1-20.0)	15.7(10.0-21.0)	15.7(10.0-21.0)	16.1(10.0-24.7)	Uniform	"<1mm"+"1-10mm"+"10-30mm"+">30mm" = 100%
	1-10mm	26.9(20.0-36.7)	27.5(25.0-30.0)	27.5(25.0-30.0)	25.0(20.3-28.0)	Uniform
	10-30mm	42.0(35.6-60.0)	39.2(20.0-44.0)	39.2(20.0-44.0)	42.3(35.3-51.3)	Uniform
	>30mm	19.4(0-28.0)	17.6 (5.0-45.0)	17.6 (5.0-45.0)	16.7 (10.7-26.0)	Uniform
Landfill and Stacking	<10mm	17.8(12.2-25.6)	17.8(12.2-25.6)	17.8(12.2-25.6)	17.8(12.2-25.6)	Uniform	"<10mm"+"10-30mm"+"30-50mm"+">50mm" = 100%
	10-30mm	27.1(19.5-35.4)	27.1(19.5-35.4)	27.1(19.5-35.4)	27.1(19.5-35.4)	Uniform
	30-50mm	17.3(10.6-22.5)	17.3(10.6-22.5)	17.3(10.6-22.5)	17.3(10.6-22.5)	Uniform
	>50mm	37.8(24.8-48.4)	37.8(24.8-48.4)	37.8(24.8-48.4)	37.8(24.8-48.4)	Uniform
RCA for bituminous concrete	<5mm	14.9 (2.1-20.0)	29.4 (22.5-36.0)	29.4 (10.0-36.0)	24.1 (15.0-37.0)	Uniform	"<5mm"+"5-10mm"+"10-20mm"+"20-32mm" = 100%
	5-10mm	25.1 (17.5-41.2)	13.8 (12.5-15.0)	13.8 (5.0-30.0)	17.0 (12.0-23.0)	Uniform
	11-20mm	40.6 (32.0-45.0)	39.2 (20.0-44.0)	39.2 (20.0-44.0)	33.9 (24.0-46.0)	Uniform
	21-32mm	19.4 (10.0-26.7)	17.6 (5.0-45.0)	17.6 (10.0-30.0)	25.0 (16.0-39.0)	Uniform
*The crushed concrete particle size distributon in China is based on field survey data from 35 cities in China
** We use the waste concrete treatment proportion, particle size, and proortion in Nordic countries for European countries' situation.
Refer to : Pade, C. and Guimaraes, M.: The CO2 uptake of concrete in a 100 year perspective, Cem. Concr. Res., 37(9), 1348–1356, doi:10.1016/j.cemconres.2007.06.009, 2007.
	Engelsen, C. J., Mehus, J., Pade, C., Sæther, D. H.: Carbon dioxide uptake in demolished and crushed concrete. Norwegian Building Research Institute, www. byggforsk. no, ISBN, 82-536,2005.
***The particle size and proportion for RCA for new cement concrete and asphalt concrete and RCA for road base materials refer to Euroean situation; landfill and stacking refer to China situation.
****The crushed concrete particle size distribution situations in other countries are estimated based on Japan and Korea.
landfill and stacking refer to China situation.
Refer to :Kikuchi, T. and Kuroda, Y.: Carbon Dioxide Uptake in Demolished and Crushed Concrete, J. Adv. Concr. Technol., 9(1), 115–124, doi:10.3151/jact.9.115, 2011.

## Sheet: SI data7
SI data 7. Concrete structure thickness by regions
The Average concrete structure thickness in USA*
Cement Utilization Category	Average concrete thickness (mm)
Commercial	100-205
Streets and highways	150-205
Utilities	305
Water and waste management	100-305
Other public works	75-610
Non-construction	100-305
* Data is from the estimation of Gajda, J.: Absorption of Atmospheric Carbon Dioxide by Portland Cement,Skokie, IL: Portland Cement Association (PCA) , 2001.
The Average concrete structure thickness in China
Structure	Average Thickness (mm)	Average Thickness (mm)	Min Thickness (mm)	Max Thickness (mm)	Sources
Wall	Shear wall	240	140	300	GB50010-2010, GB50011-2010 and JGJ3-2010
Beam	Beam rib wedth	220	100	400	P36, P52-53, and P95 "Concrete structure middle volume concrete structure and masonry structure design Fifth Edition" China Building Industry Press
Pillar	Rectangular and circular	400	250	800	JGJ3-2010
Slabs (Floor)	Ready-mix	150	60	250	"Concrete structure middle volume concrete structure and masonry structure design Fifth Edition" China Building Industry Press,P95
	Pre-cast concrete	150	110	180	GB50010-2010
Staircases	Height	150	130	200	GB50010-2010
The Average concrete structure thickness in Europe**
Ready-mix concrete in Nordic countries:production,exposure conditins and typical thicknesses of strutural elements
Structural elements	Tickness(mm)
Walls	180
Slabs	200
Foundation	240
Structures	400
** Data is from Pade, C. and Guimaraes, M.: The CO2 uptake of concrete in a 100 year perspective, Cem. Concr. Res., 37(9), 1348–1356, doi:10.1016/j.cemconres.2007.06.009, 2007.

## Sheet: SI data8
SI data 8. Distribution of mortar uses and related parameters
mortar utilization	distribution	a	b	max	min
Rendering, plastering and decorating	weibull	0.524	14	0.725	0.24
Masonry	weibull	0.188	12	0.522	0.017
Maintenance and repairing	weibull	0.332	10	0.599	0.133
*The cement mortar utilization category and proportion is derived from 1144 survey field data in China.

## Sheet: SI data9
SI data 9. The thickness of different cement mortar utilization types*
Cement mortar utilization types	Cement mortar sub-utilization types	Thickness range of utilization (mm)	Median thickness of utilization (mm)
Rendering, plastering, decorating and finishing	Rendering	10—30	20
	Plastering	1—5	3
	Tile adhesive	15—30	20
	Tile grout	3—30	15
	The exterior thermal insulation	5—10	8
	power paints and water proofing	1—2	1
	Self-leveling underlayment	5—30	20
	Screeds	30—80	50
Masonry	Masonry	5—15	10
Maintenance and repairing	Maintenance and repairing	10—30	25
* refer to 1) Lutz H, Bayer R.: Dry mortars. Ullmann'sencyclopedia of industrial chemistry , https://doi.org/10.1002/14356007.f16_f01.pub2|(Accessed 25 Augst 2020),2010
	2)Winter C, Plank J.: The European dry-mix mortar industr (Part 1).ZKG International, 60,62, https://www.zhangqiaokeyan.com/academic-journal-foreign_other_thesis/020416025873.html(Accessed 25 Augst 2020),2007

[truncated: 3 more sheets: SI data10, SI data11, SI data12]
