# Supplementary material for: Global and national CO 2 uptake by cement carbonation from 1928 to 2024
Source: Copernicus journal article supplement (doi:10.5194/essd-17-2231-2025), 2025-05-27
Supplement: Supplementary file 4 [file Table S3-Results for cement carbon uptakes and emissions.xlsx]

## Sheet: Summary
Table S3: Results for cement carbon uptakes and emissions
Index	Name	Time Span	Unit	Area
SI data 1	Global carbon uptake by cement material and use	1928-2024	million tons (Mt) CO2	global
SI data 2	Annual global carbon uptake by cement material and relevant lag time	1928-2024	million tons (Mt) CO2	global
SI data 3	Global carbon uptake by 163 countries and regions	1928-2024	million tons (Mt) CO2	42 countries and regions
SI data 4	Process carbon emissions from cement production by region and category	1928-2024	million tons (Mt) CO2	42 countries and regions

## Sheet: SI data1
SI data1. Global carbon uptake by cement material and use, 1928-2024
unit: million tons (Mt) CO2
year	1928	1929	1930	1931	1932	1933	1934	1935	1936	1937	1938	1939	1940	1941	1942	1943	1944	1945	1946	1947	1948	1949	1950	1951	1952	1953	1954	1955	1956	1957	1958	1959	1960	1961	1962	1963	1964	1965	1966	1967	1968	1969	1970	1971	1972	1973	1974	1975	1976
Concrete	-1.43001	-2.05601	-2.45545	-2.58608	-2.53078	-2.59425	-2.87292	-3.12553	-3.53693	-3.92244	-4.19083	-4.56246	-4.7863	-5.19476	-5.45541	-5.50115	-5.2259	-5.15934	-5.64204	-6.07954	-6.63886	-7.20437	-7.86094	-8.65524	-9.46126	-10.4264	-11.482	-12.6677	-13.7707	-14.6614	-15.8763	-17.3187	-18.7203	-20.1087	-21.5318	-22.9331	-24.5442	-25.9564	-27.5767	-29.0456	-30.7926	-32.4556	-34.1154	-35.8446	-37.7279	-40.1361	-42.0807	-43.5874	-46.0318
Mortar	-4.63895	-5.46402	-5.50475	-4.93214	-4.09715	-3.94933	-4.60176	-5.03375	-5.72121	-6.3702	-6.57192	-7.09187	-6.81745	-7.18691	-6.95516	-6.497	-5.17157	-4.58797	-6.0745	-7.00659	-8.25139	-9.4617	-10.8076	-12.4428	-13.7006	-14.626	-15.9618	-17.6263	-19.2233	-20.4211	-23.7065	-26.3539	-28.6881	-30.5551	-32.5288	-34.7161	-37.9138	-39.925	-42.8247	-44.7601	-47.7304	-50.3967	-53.0786	-55.5081	-58.9109	-63.5359	-64.9181	-64.9652	-70.4097
Loss	-0.449709	-0.510509	-0.519689	-0.475952	-0.404278	-0.394635	-0.450823	-0.483298	-0.543655	-0.597339	-0.612353	-0.657518	-0.635564	-0.682886	-0.660636	-0.615397	-0.477223	-0.430143	-0.564958	-0.638989	-0.748717	-0.849153	-0.967171	-1.11512	-1.2146	-1.32178	-1.4374	-1.58241	-1.7182	-1.80882	-2.03033	-2.24911	-2.4321	-2.58968	-2.76288	-2.93672	-3.21222	-3.36793	-3.6048	-3.75181	-3.99927	-4.21463	-4.4406	-4.6445	-4.88668	-5.26422	-5.33814	-5.29271	-5.64621
CKD	-1.22041	-1.27363	-1.21458	-1.04139	-0.826338	-0.810092	-0.975175	-1.05963	-1.21409	-1.33854	-1.35207	-1.45397	-1.37095	-1.49161	-1.41608	-1.29081	-0.92642	-0.840165	-1.24378	-1.43447	-1.70645	-1.93371	-2.19993	-2.53919	-2.73554	-2.95869	-3.20723	-3.53537	-3.83118	-4.00198	-4.53753	-5.03925	-5.42846	-5.7479	-6.11586	-6.4865	-7.13407	-7.43184	-7.96431	-8.24147	-8.807	-9.27037	-9.76135	-10.189	-10.7238	-11.6188	-11.6519	-11.4132	-12.3189
Total	-7.73907	-9.30416	-9.69447	-9.03556	-7.85854	-7.74831	-8.90068	-9.7022	-11.0159	-12.2285	-12.7272	-13.7658	-13.6103	-14.5562	-14.4873	-13.9044	-11.8011	-11.0176	-13.5253	-15.1596	-17.3454	-19.4489	-21.8356	-24.7524	-27.112	-29.3329	-32.0884	-35.4118	-38.5434	-40.8933	-46.1506	-50.961	-55.269	-59.0013	-62.9394	-67.0725	-72.8044	-76.6812	-81.9706	-85.7989	-91.3293	-96.3373	-101.396	-106.186	-112.249	-120.555	-123.989	-125.259	-134.407
[truncated: 48 more columns]

## Sheet: SI data2
SI data2. Annual carbon uptake by cement material and relevant lag time, 1928-2024
unit: million tons (Mt) CO2
Year	1928	1929	1930	1931	1932	1933	1934	1935	1936	1937	1938	1939	1940	1941	1942	1943	1944	1945	1946	1947	1948	1949	1950	1951	1952	1953	1954	1955	1956	1957	1958	1959	1960	1961	1962	1963	1964	1965	1966	1967	1968	1969	1970	1971	1972	1973	1974	1975	1976
1928	-7.73907	-1.21901	-0.661277	-0.481017	-0.393764	-0.340219	-0.303888	-0.277674	-0.257628	-0.241859	-0.228946	-0.217935	-0.208251	-0.199532	-0.191549	-0.184498	-0.177931	-0.172033	-0.166394	-0.16128	-0.156503	-0.152105	-0.147874	-0.143946	-0.235026	-0.309324	-0.363961	-0.351615	-0.235365	-0.143199	-0.121689	-0.118075	-0.114903	-0.112081	-0.109475	-0.115879	-0.115558	-0.115859	-0.116681	-0.115594	-0.117341	-0.118216	-0.117819	-0.120837	-0.121418	-0.121903	-0.125059	-0.122668	-0.12235
1929	0	-8.08515	-1.26472	-0.682208	-0.494777	-0.404374	-0.34904	-0.311582	-0.284601	-0.263986	-0.247831	-0.234578	-0.223342	-0.21346	-0.204554	-0.196405	-0.189262	-0.182559	-0.176611	-0.17089	-0.165736	-0.160894	-0.15648	-0.152132	-0.148184	-0.24993	-0.332985	-0.394115	-0.380715	-0.251681	-0.149476	-0.125837	-0.12207	-0.118794	-0.115944	-0.113299	-0.120054	-0.119654	-0.120117	-0.121159	-0.119886	-0.121885	-0.122862	-0.122418	-0.12563	-0.126212	-0.126709	-0.13012	-0.1276
1930	0	0	-7.76847	-1.21302	-0.652385	-0.472468	-0.385872	-0.332931	-0.29713	-0.271362	-0.251684	-0.236296	-0.223639	-0.212953	-0.203548	-0.195055	-0.187278	-0.180508	-0.17411	-0.168492	-0.163052	-0.158183	-0.153585	-0.14943	-0.145248	-0.141525	-0.230493	-0.303114	-0.356489	-0.344517	-0.231164	-0.141399	-0.120506	-0.117001	-0.113945	-0.111325	-0.108868	-0.115515	-0.11523	-0.115661	-0.116825	-0.115785	-0.117668	-0.11867	-0.118155	-0.121309	-0.121698	-0.122518	-0.125671
1931	0	0	0	-6.65932	-1.02937	-0.54912	-0.395953	-0.322606	-0.277898	-0.24778	-0.226154	-0.209676	-0.196852	-0.186292	-0.17744	-0.169653	-0.162615	-0.156183	-0.150632	-0.145343	-0.140766	-0.136306	-0.132345	-0.128579	-0.125219	-0.121734	-0.118717	-0.205075	-0.275627	-0.32757	-0.31649	-0.207595	-0.121459	-0.1017	-0.0986837	-0.0960925	-0.0939342	-0.0919008	-0.097074	-0.0965751	-0.0969842	-0.0980081	-0.0969187	-0.0984285	-0.0992478	-0.0986841	-0.101114	-0.101298	-0.101842
1932	0	0	0	0	-5.28824	-0.80422	-0.423467	-0.303221	-0.246051	-0.211383	-0.188171	-0.171572	-0.158977	-0.149177	-0.141198	-0.134457	-0.128558	-0.123279	-0.118485	-0.114275	-0.110349	-0.10686	-0.103535	-0.10053	-0.0977092	-0.0951353	-0.0926059	-0.0903103	-0.180237	-0.253729	-0.308045	-0.2973	-0.18553	-0.0971075	-0.0772323	-0.0747248	-0.0726051	-0.0707885	-0.0691276	-0.0732096	-0.0729202	-0.0728999	-0.0736077	-0.0732584	-0.0747819	-0.0761867	-0.0766781	-0.0792704	-0.0801112
1933	0	0	0	0	0	-5.17791	-0.781291	-0.408748	-0.291563	-0.236087	-0.202522	-0.180137	-0.164164	-0.152057	-0.142684	-0.135038	-0.128631	-0.123025	-0.118002	-0.113449	-0.109491	-0.105762	-0.102506	-0.0993769	-0.0965764	-0.0939245	-0.0915399	-0.0891131	-0.0869805	-0.203057	-0.298007	-0.368316	-0.355194	-0.212495	-0.0997223	-0.0747892	-0.0720988	-0.0698877	-0.0680661	-0.0664076	-0.0699358	-0.0696163	-0.0691604	-0.0697565	-0.0694259	-0.0709648	-0.0723287	-0.073037	-0.0755782
1934	0	0	0	0	0	0	-6.26117	-0.9454	-0.494637	-0.352845	-0.285698	-0.245088	-0.218005	-0.198668	-0.18402	-0.172654	-0.163415	-0.155628	-0.148821	-0.142737	-0.137226	-0.13239	-0.127879	-0.123881	-0.120074	-0.116636	-0.113404	-0.11046	-0.107553	-0.104927	-0.228955	-0.330364	-0.405409	-0.391078	-0.237947	-0.116858	-0.0899061	-0.0868122	-0.0842344	-0.0820531	-0.080069	-0.0844509	-0.0841619	-0.0837457	-0.0844066	-0.0841331	-0.0858458	-0.0874534	-0.0882081
1935	0	0	0	0	0	0	0	-6.80004	-1.02154	-0.532332	-0.378887	-0.306348	-0.26256	-0.233419	-0.212633	-0.196916	-0.184732	-0.174854	-0.166521	-0.159248	-0.152762	-0.146899	-0.141738	-0.136945	-0.132677	-0.128632	-0.124968	-0.12153	-0.118385	-0.115312	-0.11251	-0.254937	-0.371397	-0.457629	-0.441372	-0.265934	-0.127212	-0.0964402	-0.0930425	-0.0902254	-0.0878353	-0.085673	-0.090704	-0.090566	-0.0901052	-0.090848	-0.0907508	-0.0929362	-0.09496
1936	0	0	0	0	0	0	0	0	-7.84484	-1.19422	-0.628518	-0.449803	-0.364844	-0.31336	-0.278948	-0.254322	-0.235647	-0.221168	-0.209314	-0.199374	-0.190661	-0.182822	-0.175698	-0.16952	-0.163679	-0.158588	-0.153673	-0.149284	-0.14512	-0.141381	-0.137559	-0.134205	-0.284865	-0.408067	-0.499173	-0.481598	-0.29526	-0.14796	-0.115094	-0.111183	-0.107921	-0.105219	-0.102727	-0.1087	-0.108413	-0.107883	-0.108936	-0.108434	-0.111241
1937	0	0	0	0	0	0	0	0	0	-8.67666	-1.31571	-0.689589	-0.492352	-0.398856	-0.342312	-0.304593	-0.27764	-0.257193	-0.241443	-0.228447	-0.217704	-0.208265	-0.199722	-0.191951	-0.185356	-0.178974	-0.173601	-0.168301	-0.163664	-0.15919	-0.155289	-0.151015	-0.14749	-0.309602	-0.442233	-0.540248	-0.521389	-0.321025	-0.162785	-0.127523	-0.123292	-0.11979	-0.117033	-0.114433	-0.123106	-0.123164	-0.122854	-0.125068	-0.124797
1938	0	0	0	0	0	0	0	0	0	0	-8.77305	-1.32095	-0.688111	-0.489669	-0.395897	-0.339351	-0.301739	-0.274894	-0.254568	-0.238955	-0.226086	-0.215479	-0.206169	-0.197749	-0.190106	-0.183638	-0.177364	-0.172111	-0.166923	-0.162396	-0.158018	-0.154215	-0.150006	-0.146566	-0.282298	-0.393146	-0.475064	-0.45887	-0.290267	-0.157073	-0.12715	-0.123241	-0.119973	-0.117412	-0.11496	-0.123348	-0.123485	-0.123145	-0.125223
1939	0	0	0	0	0	0	0	0	0	0	0	-9.50383	-1.43505	-0.748022	-0.532577	-0.430768	-0.369386	-0.328528	-0.299365	-0.277237	-0.260346	-0.246252	-0.234825	-0.224746	-0.215542	-0.207157	-0.200262	-0.193358	-0.187834	-0.182206	-0.177432	-0.172708	-0.168768	-0.163994	-0.160391	-0.282176	-0.381847	-0.455163	-0.440075	-0.287698	-0.167543	-0.140289	-0.136291	-0.132944	-0.130511	-0.128071	-0.137508	-0.137556	-0.1371
1940	0	0	0	0	0	0	0	0	0	0	0	0	-8.97412	-1.36381	-0.714402	-0.510185	-0.41334	-0.354877	-0.315842	-0.287935	-0.266721	-0.250543	-0.236954	-0.225991	-0.216296	-0.207396	-0.199264	-0.192646	-0.185937	-0.180655	-0.175201	-0.170622	-0.166057	-0.162303	-0.157611	-0.154162	-0.255741	-0.338896	-0.39991	-0.386896	-0.258937	-0.158117	-0.135034	-0.131325	-0.128206	-0.126004	-0.123747	-0.135118	-0.13557
1941	0	0	0	0	0	0	0	0	0	0	0	0	0	-9.69689	-1.48956	-0.788423	-0.566177	-0.460147	-0.395859	-0.352739	-0.321824	-0.298272	-0.280137	-0.265977	-0.253799	-0.243108	-0.239689	-0.233727	-0.230578	-0.228394	-0.230107	-0.229071	-0.230509	-0.229603	-0.224349	-0.211514	-0.197141	-0.33255	-0.446385	-0.531025	-0.511785	-0.32662	-0.180498	-0.147215	-0.142467	-0.138329	-0.135275	-0.132291	-0.142656
1942	0	0	0	0	0	0	0	0	0	0	0	0	0	0	-9.27596	-1.43854	-0.765917	-0.551918	-0.4495	-0.387267	-0.345377	-0.315303	-0.29232	-0.27468	-0.259792	-0.247713	-0.236997	-0.232726	-0.226473	-0.222881	-0.219875	-0.220824	-0.219326	-0.22003	-0.218744	-0.213681	-0.20157	-0.18862	-0.289587	-0.374911	-0.438661	-0.42331	-0.281725	-0.170119	-0.14453	-0.140345	-0.136819	-0.134289	-0.131732
1943	0	0	0	0	0	0	0	0	0	0	0	0	0	0	0	-8.4535	-1.29236	-0.680263	-0.487203	-0.395353	-0.339855	-0.302695	-0.276094	-0.255818	-0.240372	-0.227315	-0.216831	-0.207536	-0.205603	-0.201093	-0.19929	-0.198128	-0.201277	-0.201535	-0.204142	-0.204324	-0.199812	-0.187087	-0.173092	-0.260094	-0.334491	-0.390451	-0.376664	-0.250474	-0.151085	-0.128394	-0.124745	-0.121697	-0.119606
1944	0	0	0	0	0	0	0	0	0	0	0	0	0	0	0	0	-6.25648	-0.943086	-0.487354	-0.345648	-0.279044	-0.239137	-0.212566	-0.19366	-0.179316	-0.168452	-0.159254	-0.151923	-0.145423	-0.144178	-0.141074	-0.139938	-0.139216	-0.141622	-0.141925	-0.143924	-0.14416	-0.141055	-0.131989	-0.122073	-0.193184	-0.253616	-0.299085	-0.28848	-0.187836	-0.10858	-0.0906888	-0.08804	-0.0858546
1945	0	0	0	0	0	0	0	0	0	0	0	0	0	0	0	0	0	-5.67747	-0.869208	-0.454681	-0.324605	-0.263099	-0.226006	-0.20117	-0.183422	-0.169948	-0.1595	-0.150887	-0.143695	-0.137363	-0.131658	-0.126431	-0.121949	-0.117663	-0.113988	-0.110382	-0.107197	-0.104153	-0.101428	-0.0985435	-0.096053	-0.139465	-0.173831	-0.199698	-0.193537	-0.137493	-0.0928628	-0.0822268	-0.0800444
1946	0	0	0	0	0	0	0	0	0	0	0	0	0	0	0	0	0	0	-8.29605	-1.28144	-0.677291	-0.486293	-0.395389	-0.340264	-0.30317	-0.276591	-0.256399	-0.240576	-0.22767	-0.216673	-0.207019	-0.198405	-0.190512	-0.183543	-0.177086	-0.17129	-0.165755	-0.160737	-0.156043	-0.151668	-0.147436	-0.143459	-0.174387	-0.19867	-0.216609	-0.21027	-0.166189	-0.130781	-0.121316
1947	0	0	0	0	0	0	0	0	0	0	0	0	0	0	0	0	0	0	0	-9.53481	-1.47211	-0.778472	-0.559043	-0.454585	-0.391246	-0.348624	-0.318084	-0.294852	-0.276753	-0.26189	-0.249374	-0.238359	-0.228497	-0.219424	-0.211597	-0.204183	-0.197764	-0.191482	-0.185917	-0.180611	-0.175779	-0.170741	-0.166261	-0.212452	-0.248779	-0.275888	-0.267766	-0.204754	-0.154399
1948	0	0	0	0	0	0	0	0	0	0	0	0	0	0	0	0	0	0	0	0	-11.2879	-1.7353	-0.915441	-0.656541	-0.533407	-0.458823	-0.408707	-0.372811	-0.345529	-0.324322	-0.30699	-0.292383	-0.27954	-0.268037	-0.25745	-0.24836	-0.239733	-0.232289	-0.224979	-0.218538	-0.212367	-0.206789	-0.200915	-0.195729	-0.243632	-0.282114	-0.310045	-0.300902	-0.234082
1949	0	0	0	0	0	0	0	0	0	0	0	0	0	0	0	0	0	0	0	0	0	-12.8276	-1.95658	-1.02513	-0.732388	-0.5937	-0.51001	-0.453967	-0.413909	-0.383484	-0.359993	-0.34056	-0.32446	-0.310283	-0.297539	-0.28585	-0.275962	-0.266393	-0.258388	-0.25042	-0.243488	-0.236775	-0.230826	-0.224207	-0.21866	-0.302685	-0.370748	-0.42067	-0.407738
1950	0	0	0	0	0	0	0	0	0	0	0	0	0	0	0	0	0	0	0	0	0	0	-14.6027	-2.21737	-1.15755	-0.825306	-0.6682	-0.573534	-0.510236	-0.46503	-0.430801	-0.404152	-0.38247	-0.364097	-0.348018	-0.333667	-0.320596	-0.309091	-0.298405	-0.288866	-0.279776	-0.271549	-0.263835	-0.256716	-0.249764	-0.243344	-0.357368	-0.449634	-0.517664
1951	0	0	0	0	0	0	0	0	0	0	0	0	0	0	0	0	0	0	0	0	0	0	0	-16.8224	-2.5467	-1.32648	-0.944594	-0.764214	-0.655688	-0.583206	-0.531487	-0.492284	-0.462016	-0.437433	-0.416794	-0.398691	-0.382425	-0.367499	-0.354802	-0.342673	-0.332309	-0.322077	-0.313147	-0.304517	-0.296885	-0.28866	-0.281602	-0.448123	-0.58341
1952	0	0	0	0	0	0	0	0	0	0	0	0	0	0	0	0	0	0	0	0	0	0	0	0	-18.2591	-2.74876	-1.42285	-1.00977	-0.815416	-0.698861	-0.621221	-0.565917	-0.524016	-0.491909	-0.465714	-0.443987	-0.424896	-0.407785	-0.391984	-0.378914	-0.366145	-0.355713	-0.345092	-0.336101	-0.32718	-0.319447	-0.310306	-0.302848	-0.484309
1953	0	0	0	0	0	0	0	0	0	0	0	0	0	0	0	0	0	0	0	0	0	0	0	0	0	-19.5054	-2.9428	-1.52999	-1.0889	-0.880369	-0.755231	-0.671662	-0.6121	-0.566816	-0.532566	-0.503992	-0.481065	-0.460763	-0.442278	-0.425136	-0.411724	-0.397806	-0.387443	-0.376219	-0.367253	-0.357918	-0.350438	-0.339907	-0.332455
1954	0	0	0	0	0	0	0	0	0	0	0	0	0	0	0	0	0	0	0	0	0	0	0	0	0	0	-21.2317	-3.19068	-1.65196	-1.17302	-0.947139	-0.811876	-0.721701	-0.657521	-0.608755	-0.572039	-0.541228	-0.516744	-0.495034	-0.475265	-0.456911	-0.442767	-0.427871	-0.417093	-0.40521	-0.39588	-0.38602	-0.378245	-0.366727
1955	0	0	0	0	0	0	0	0	0	0	0	0	0	0	0	0	0	0	0	0	0	0	0	0	0	0	0	-23.4636	-3.52319	-1.82226	-1.29326	-1.04388	-0.894634	-0.795153	-0.724359	-0.670625	-0.630027	-0.596129	-0.568958	-0.54492	-0.523072	-0.502852	-0.486987	-0.470564	-0.458309	-0.445093	-0.434497	-0.423496	-0.414638
1956	0	0	0	0	0	0	0	0	0	0	0	0	0	0	0	0	0	0	0	0	0	0	0	0	0	0	0	0	-25.4915	-3.82263	-1.97367	-1.39934	-1.12894	-0.967312	-0.85967	-0.783133	-0.724944	-0.681428	-0.644348	-0.615429	-0.589698	-0.565926	-0.543945	-0.527348	-0.509347	-0.49679	-0.48266	-0.471757	-0.460082
1957	0	0	0	0	0	0	0	0	0	0	0	0	0	0	0	0	0	0	0	0	0	0	0	0	0	0	0	0	0	-26.7578	-3.9878	-2.04613	-1.44572	-1.16404	-0.996195	-0.884666	-0.805524	-0.745454	-0.700674	-0.662624	-0.633007	-0.606672	-0.582563	-0.560162	-0.543457	-0.52525	-0.512846	-0.49864	-0.487885
1958	0	0	0	0	0	0	0	0	0	0	0	0	0	0	0	0	0	0	0	0	0	0	0	0	0	0	0	0	0	0	-30.9948	-4.57406	-2.31599	-1.6235	-1.3018	-1.11125	-0.985433	-0.896555	-0.829135	-0.779505	-0.737241	-0.704925	-0.676107	-0.650422	-0.625987	-0.608961	-0.589569	-0.578048	-0.563389
1959	0	0	0	0	0	0	0	0	0	0	0	0	0	0	0	0	0	0	0	0	0	0	0	0	0	0	0	0	0	0	0	-34.341	-5.06685	-2.56659	-1.79958	-1.44318	-1.23213	-1.09281	-0.994401	-0.919583	-0.865042	-0.817912	-0.782721	-0.751165	-0.722829	-0.695714	-0.677766	-0.656239	-0.644689
1960	0	0	0	0	0	0	0	0	0	0	0	0	0	0	0	0	0	0	0	0	0	0	0	0	0	0	0	0	0	0	0	0	-37.0656	-5.44134	-2.74319	-1.91811	-1.5357	-1.30974	-1.1609	-1.05595	-0.976259	-0.918391	-0.868347	-0.831204	-0.797893	-0.768187	-0.739651	-0.721119	-0.69859
1961	0	0	0	0	0	0	0	0	0	0	0	0	0	0	0	0	0	0	0	0	0	0	0	0	0	0	0	0	0	0	0	0	0	-39.2354	-5.74709	-2.89275	-2.02069	-1.61679	-1.37809	-1.22092	-1.11011	-1.02635	-0.964437	-0.912623	-0.872288	-0.836542	-0.805809	-0.776303	-0.755432
1962	0	0	0	0	0	0	0	0	0	0	0	0	0	0	0	0	0	0	0	0	0	0	0	0	0	0	0	0	0	0	0	0	0	0	-41.7128	-6.10625	-3.07322	-2.14647	-1.71726	-1.46352	-1.29647	-1.17868	-1.08979	-1.02365	-0.969032	-0.925728	-0.887517	-0.85609	-0.825449
1963	0	0	0	0	0	0	0	0	0	0	0	0	0	0	0	0	0	0	0	0	0	0	0	0	0	0	0	0	0	0	0	0	0	0	0	-44.3964	-6.49036	-3.25967	-2.27399	-1.81808	-1.54892	-1.37183	-1.24705	-1.15289	-1.08299	-1.02442	-0.978579	-0.938054	-0.904257
1964	0	0	0	0	0	0	0	0	0	0	0	0	0	0	0	0	0	0	0	0	0	0	0	0	0	0	0	0	0	0	0	0	0	0	0	0	-48.6975	-7.11313	-3.57161	-2.49119	-1.99145	-1.6964	-1.50231	-1.36555	-1.26241	-1.18573	-1.12193	-1.07169	-1.02734
1965	0	0	0	0	0	0	0	0	0	0	0	0	0	0	0	0	0	0	0	0	0	0	0	0	0	0	0	0	0	0	0	0	0	0	0	0	0	-50.868	-7.41903	-3.71832	-2.59118	-2.07015	-1.76289	-1.56084	-1.41856	-1.3113	-1.23168	-1.16507	-1.11287
1966	0	0	0	0	0	0	0	0	0	0	0	0	0	0	0	0	0	0	0	0	0	0	0	0	0	0	0	0	0	0	0	0	0	0	0	0	0	0	-54.5902	-7.95017	-3.97848	-2.76999	-2.21181	-1.88287	-1.66666	-1.5145	-1.3999	-1.31469	-1.24352
1967	0	0	0	0	0	0	0	0	0	0	0	0	0	0	0	0	0	0	0	0	0	0	0	0	0	0	0	0	0	0	0	0	0	0	0	0	0	0	0	-56.6287	-8.22641	-4.10551	-2.85366	-2.27646	-1.93652	-1.71331	-1.55636	-1.4385	-1.35002
1968	0	0	0	0	0	0	0	0	0	0	0	0	0	0	0	0	0	0	0	0	0	0	0	0	0	0	0	0	0	0	0	0	0	0	0	0	0	0	0	0	-60.5152	-8.78688	-4.38296	-3.04534	-2.4289	-2.0659	-1.82764	-1.66016	-1.53437
1969	0	0	0	0	0	0	0	0	0	0	0	0	0	0	0	0	0	0	0	0	0	0	0	0	0	0	0	0	0	0	0	0	0	0	0	0	0	0	0	0	0	-63.7205	-9.24086	-4.60344	-3.19598	-2.54789	-2.16643	-1.91624	-1.74048
1970	0	0	0	0	0	0	0	0	0	0	0	0	0	0	0	0	0	0	0	0	0	0	0	0	0	0	0	0	0	0	0	0	0	0	0	0	0	0	0	0	0	0	-66.9939	-9.69696	-4.82385	-3.34612	-2.66612	-2.26615	-2.00396
1971	0	0	0	0	0	0	0	0	0	0	0	0	0	0	0	0	0	0	0	0	0	0	0	0	0	0	0	0	0	0	0	0	0	0	0	0	0	0	0	0	0	0	0	-69.9146	-10.1147	-5.02964	-3.48815	-2.77885	-2.36177
1972	0	0	0	0	0	0	0	0	0	0	0	0	0	0	0	0	0	0	0	0	0	0	0	0	0	0	0	0	0	0	0	0	0	0	0	0	0	0	0	0	0	0	0	0	-74.0378	-10.685	-5.29297	-3.66251	-2.91412
1973	0	0	0	0	0	0	0	0	0	0	0	0	0	0	0	0	0	0	0	0	0	0	0	0	0	0	0	0	0	0	0	0	0	0	0	0	0	0	0	0	0	0	0	0	0	-80.1008	-11.5507	-5.71757	-3.95431
1974	0	0	0	0	0	0	0	0	0	0	0	0	0	0	0	0	0	0	0	0	0	0	0	0	0	0	0	0	0	0	0	0	0	0	0	0	0	0	0	0	0	0	0	0	0	0	-80.7805	-11.629	-5.74067
1975	0	0	0	0	0	0	0	0	0	0	0	0	0	0	0	0	0	0	0	0	0	0	0	0	0	0	0	0	0	0	0	0	0	0	0	0	0	0	0	0	0	0	0	0	0	0	0	-79.7455	-11.4186
1976	0	0	0	0	0	0	0	0	0	0	0	0	0	0	0	0	0	0	0	0	0	0	0	0	0	0	0	0	0	0	0	0	0	0	0	0	0	0	0	0	0	0	0	0	0	0	0	0	-87.0379
1977	0	0	0	0	0	0	0	0	0	0	0	0	0	0	0	0	0	0	0	0	0	0	0	0	0	0	0	0	0	0	0	0	0	0	0	0	0	0	0	0	0	0	0	0	0	0	0	0	0
1978	0	0	0	0	0	0	0	0	0	0	0	0	0	0	0	0	0	0	0	0	0	0	0	0	0	0	0	0	0	0	0	0	0	0	0	0	0	0	0	0	0	0	0	0	0	0	0	0	0
1979	0	0	0	0	0	0	0	0	0	0	0	0	0	0	0	0	0	0	0	0	0	0	0	0	0	0	0	0	0	0	0	0	0	0	0	0	0	0	0	0	0	0	0	0	0	0	0	0	0
1980	0	0	0	0	0	0	0	0	0	0	0	0	0	0	0	0	0	0	0	0	0	0	0	0	0	0	0	0	0	0	0	0	0	0	0	0	0	0	0	0	0	0	0	0	0	0	0	0	0
1981	0	0	0	0	0	0	0	0	0	0	0	0	0	0	0	0	0	0	0	0	0	0	0	0	0	0	0	0	0	0	0	0	0	0	0	0	0	0	0	0	0	0	0	0	0	0	0	0	0
1982	0	0	0	0	0	0	0	0	0	0	0	0	0	0	0	0	0	0	0	0	0	0	0	0	0	0	0	0	0	0	0	0	0	0	0	0	0	0	0	0	0	0	0	0	0	0	0	0	0
1983	0	0	0	0	0	0	0	0	0	0	0	0	0	0	0	0	0	0	0	0	0	0	0	0	0	0	0	0	0	0	0	0	0	0	0	0	0	0	0	0	0	0	0	0	0	0	0	0	0
1984	0	0	0	0	0	0	0	0	0	0	0	0	0	0	0	0	0	0	0	0	0	0	0	0	0	0	0	0	0	0	0	0	0	0	0	0	0	0	0	0	0	0	0	0	0	0	0	0	0
1985	0	0	0	0	0	0	0	0	0	0	0	0	0	0	0	0	0	0	0	0	0	0	0	0	0	0	0	0	0	0	0	0	0	0	0	0	0	0	0	0	0	0	0	0	0	0	0	0	0
1986	0	0	0	0	0	0	0	0	0	0	0	0	0	0	0	0	0	0	0	0	0	0	0	0	0	0	0	0	0	0	0	0	0	0	0	0	0	0	0	0	0	0	0	0	0	0	0	0	0
1987	0	0	0	0	0	0	0	0	0	0	0	0	0	0	0	0	0	0	0	0	0	0	0	0	0	0	0	0	0	0	0	0	0	0	0	0	0	0	0	0	0	0	0	0	0	0	0	0	0
1988	0	0	0	0	0	0	0	0	0	0	0	0	0	0	0	0	0	0	0	0	0	0	0	0	0	0	0	0	0	0	0	0	0	0	0	0	0	0	0	0	0	0	0	0	0	0	0	0	0
1989	0	0	0	0	0	0	0	0	0	0	0	0	0	0	0	0	0	0	0	0	0	0	0	0	0	0	0	0	0	0	0	0	0	0	0	0	0	0	0	0	0	0	0	0	0	0	0	0	0
1990	0	0	0	0	0	0	0	0	0	0	0	0	0	0	0	0	0	0	0	0	0	0	0	0	0	0	0	0	0	0	0	0	0	0	0	0	0	0	0	0	0	0	0	0	0	0	0	0	0
1991	0	0	0	0	0	0	0	0	0	0	0	0	0	0	0	0	0	0	0	0	0	0	0	0	0	0	0	0	0	0	0	0	0	0	0	0	0	0	0	0	0	0	0	0	0	0	0	0	0
1992	0	0	0	0	0	0	0	0	0	0	0	0	0	0	0	0	0	0	0	0	0	0	0	0	0	0	0	0	0	0	0	0	0	0	0	0	0	0	0	0	0	0	0	0	0	0	0	0	0
1993	0	0	0	0	0	0	0	0	0	0	0	0	0	0	0	0	0	0	0	0	0	0	0	0	0	0	0	0	0	0	0	0	0	0	0	0	0	0	0	0	0	0	0	0	0	0	0	0	0
1994	0	0	0	0	0	0	0	0	0	0	0	0	0	0	0	0	0	0	0	0	0	0	0	0	0	0	0	0	0	0	0	0	0	0	0	0	0	0	0	0	0	0	0	0	0	0	0	0	0
1995	0	0	0	0	0	0	0	0	0	0	0	0	0	0	0	0	0	0	0	0	0	0	0	0	0	0	0	0	0	0	0	0	0	0	0	0	0	0	0	0	0	0	0	0	0	0	0	0	0
1996	0	0	0	0	0	0	0	0	0	0	0	0	0	0	0	0	0	0	0	0	0	0	0	0	0	0	0	0	0	0	0	0	0	0	0	0	0	0	0	0	0	0	0	0	0	0	0	0	0
1997	0	0	0	0	0	0	0	0	0	0	0	0	0	0	0	0	0	0	0	0	0	0	0	0	0	0	0	0	0	0	0	0	0	0	0	0	0	0	0	0	0	0	0	0	0	0	0	0	0
1998	0	0	0	0	0	0	0	0	0	0	0	0	0	0	0	0	0	0	0	0	0	0	0	0	0	0	0	0	0	0	0	0	0	0	0	0	0	0	0	0	0	0	0	0	0	0	0	0	0
1999	0	0	0	0	0	0	0	0	0	0	0	0	0	0	0	0	0	0	0	0	0	0	0	0	0	0	0	0	0	0	0	0	0	0	0	0	0	0	0	0	0	0	0	0	0	0	0	0	0
2000	0	0	0	0	0	0	0	0	0	0	0	0	0	0	0	0	0	0	0	0	0	0	0	0	0	0	0	0	0	0	0	0	0	0	0	0	0	0	0	0	0	0	0	0	0	0	0	0	0
2001	0	0	0	0	0	0	0	0	0	0	0	0	0	0	0	0	0	0	0	0	0	0	0	0	0	0	0	0	0	0	0	0	0	0	0	0	0	0	0	0	0	0	0	0	0	0	0	0	0
2002	0	0	0	0	0	0	0	0	0	0	0	0	0	0	0	0	0	0	0	0	0	0	0	0	0	0	0	0	0	0	0	0	0	0	0	0	0	0	0	0	0	0	0	0	0	0	0	0	0
2003	0	0	0	0	0	0	0	0	0	0	0	0	0	0	0	0	0	0	0	0	0	0	0	0	0	0	0	0	0	0	0	0	0	0	0	0	0	0	0	0	0	0	0	0	0	0	0	0	0
2004	0	0	0	0	0	0	0	0	0	0	0	0	0	0	0	0	0	0	0	0	0	0	0	0	0	0	0	0	0	0	0	0	0	0	0	0	0	0	0	0	0	0	0	0	0	0	0	0	0
2005	0	0	0	0	0	0	0	0	0	0	0	0	0	0	0	0	0	0	0	0	0	0	0	0	0	0	0	0	0	0	0	0	0	0	0	0	0	0	0	0	0	0	0	0	0	0	0	0	0
2006	0	0	0	0	0	0	0	0	0	0	0	0	0	0	0	0	0	0	0	0	0	0	0	0	0	0	0	0	0	0	0	0	0	0	0	0	0	0	0	0	0	0	0	0	0	0	0	0	0
2007	0	0	0	0	0	0	0	0	0	0	0	0	0	0	0	0	0	0	0	0	0	0	0	0	0	0	0	0	0	0	0	0	0	0	0	0	0	0	0	0	0	0	0	0	0	0	0	0	0
2008	0	0	0	0	0	0	0	0	0	0	0	0	0	0	0	0	0	0	0	0	0	0	0	0	0	0	0	0	0	0	0	0	0	0	0	0	0	0	0	0	0	0	0	0	0	0	0	0	0
2009	0	0	0	0	0	0	0	0	0	0	0	0	0	0	0	0	0	0	0	0	0	0	0	0	0	0	0	0	0	0	0	0	0	0	0	0	0	0	0	0	0	0	0	0	0	0	0	0	0
2010	0	0	0	0	0	0	0	0	0	0	0	0	0	0	0	0	0	0	0	0	0	0	0	0	0	0	0	0	0	0	0	0	0	0	0	0	0	0	0	0	0	0	0	0	0	0	0	0	0
2011	0	0	0	0	0	0	0	0	0	0	0	0	0	0	0	0	0	0	0	0	0	0	0	0	0	0	0	0	0	0	0	0	0	0	0	0	0	0	0	0	0	0	0	0	0	0	0	0	0
2012	0	0	0	0	0	0	0	0	0	0	0	0	0	0	0	0	0	0	0	0	0	0	0	0	0	0	0	0	0	0	0	0	0	0	0	0	0	0	0	0	0	0	0	0	0	0	0	0	0
2013	0	0	0	0	0	0	0	0	0	0	0	0	0	0	0	0	0	0	0	0	0	0	0	0	0	0	0	0	0	0	0	0	0	0	0	0	0	0	0	0	0	0	0	0	0	0	0	0	0
2014	0	0	0	0	0	0	0	0	0	0	0	0	0	0	0	0	0	0	0	0	0	0	0	0	0	0	0	0	0	0	0	0	0	0	0	0	0	0	0	0	0	0	0	0	0	0	0	0	0
2015	0	0	0	0	0	0	0	0	0	0	0	0	0	0	0	0	0	0	0	0	0	0	0	0	0	0	0	0	0	0	0	0	0	0	0	0	0	0	0	0	0	0	0	0	0	0	0	0	0
2016	0	0	0	0	0	0	0	0	0	0	0	0	0	0	0	0	0	0	0	0	0	0	0	0	0	0	0	0	0	0	0	0	0	0	0	0	0	0	0	0	0	0	0	0	0	0	0	0	0
2017	0	0	0	0	0	0	0	0	0	0	0	0	0	0	0	0	0	0	0	0	0	0	0	0	0	0	0	0	0	0	0	0	0	0	0	0	0	0	0	0	0	0	0	0	0	0	0	0	0
2018	0	0	0	0	0	0	0	0	0	0	0	0	0	0	0	0	0	0	0	0	0	0	0	0	0	0	0	0	0	0	0	0	0	0	0	0	0	0	0	0	0	0	0	0	0	0	0	0	0
2019	0	0	0	0	0	0	0	0	0	0	0	0	0	0	0	0	0	0	0	0	0	0	0	0	0	0	0	0	0	0	0	0	0	0	0	0	0	0	0	0	0	0	0	0	0	0	0	0	0
2020	0	0	0	0	0	0	0	0	0	0	0	0	0	0	0	0	0	0	0	0	0	0	0	0	0	0	0	0	0	0	0	0	0	0	0	0	0	0	0	0	0	0	0	0	0	0	0	0	0
2021	0	0	0	0	0	0	0	0	0	0	0	0	0	0	0	0	0	0	0	0	0	0	0	0	0	0	0	0	0	0	0	0	0	0	0	0	0	0	0	0	0	0	0	0	0	0	0	0	0
2022	0	0	0	0	0	0	0	0	0	0	0	0	0	0	0	0	0	0	0	0	0	0	0	0	0	0	0	0	0	0	0	0	0	0	0	0	0	0	0	0	0	0	0	0	0	0	0	0	0
2023	0	0	0	0	0	0	0	0	0	0	0	0	0	0	0	0	0	0	0	0	0	0	0	0	0	0	0	0	0	0	0	0	0	0	0	0	0	0	0	0	0	0	0	0	0	0	0	0	0
2024	0	0	0	0	0	0	0	0	0	0	0	0	0	0	0	0	0	0	0	0	0	0	0	0	0	0	0	0	0	0	0	0	0	0	0	0	0	0	0	0	0	0	0	0	0	0	0	0	0
Total	-7.73907	-9.30416	-9.69447	-9.03556	-7.85854	-7.74831	-8.90068	-9.7022	-11.0159	-12.2285	-12.7272	-13.7658	-13.6103	-14.5562	-14.4873	-13.9044	-11.8011	-11.0176	-13.5253	-15.1596	-17.3454	-19.4489	-21.8356	-24.7524	-27.112	-29.3329	-32.0884	-35.4118	-38.5434	-40.8933	-46.1506	-50.961	-55.269	-59.0013	-62.9394	-67.0725	-72.8044	-76.6812	-81.9706	-85.7989	-91.3293	-96.3373	-101.396	-106.186	-112.249	-120.555	-123.989	-125.259	-134.407
Current	-7.73907	-8.08515	-7.76847	-6.65932	-5.28824	-5.17791	-6.26117	-6.80004	-7.84484	-8.67666	-8.77305	-9.50383	-8.97412	-9.69689	-9.27596	-8.4535	-6.25648	-5.67747	-8.29605	-9.53481	-11.2879	-12.8276	-14.6027	-16.8224	-18.2591	-19.5054	-21.2317	-23.4636	-25.4915	-26.7578	-30.9948	-34.341	-37.0656	-39.2354	-41.7128	-44.3964	-48.6975	-50.868	-54.5902	-56.6287	-60.5152	-63.7205	-66.9939	-69.9146	-74.0378	-80.1008	-80.7805	-79.7455	-87.0379
Historical	0	-1.21901	-1.92599	-2.37624	-2.5703	-2.5704	-2.63951	-2.90216	-3.17105	-3.55186	-3.95412	-4.26197	-4.63615	-4.85927	-5.21132	-5.45086	-5.54463	-5.34014	-5.22923	-5.62478	-6.05751	-6.62133	-7.23289	-7.92997	-8.85286	-9.82742	-10.8568	-11.9482	-13.0519	-14.1355	-15.1558	-16.62	-18.2034	-19.7659	-21.2266	-22.6761	-24.1069	-25.8132	-27.3804	-29.1702	-30.8141	-32.6168	-34.402	-36.2717	-38.2115	-40.4542	-43.2083	-45.5132	-47.3687
[truncated: 48 more columns]

## Sheet: SI data3
SI data3. Global carbon uptake by 163 countries and regions, 1928-2024
unit: million tons (Mt) CO2
code	ISO	Countries	1928	1929	1930	1931	1932	1933	1934	1935	1936	1937	1938	1939	1940	1941	1942	1943	1944	1945	1946	1947	1948	1949	1950	1951	1952	1953	1954	1955	1956	1957	1958	1959	1960	1961	1962	1963	1964	1965	1966	1967	1968	1969	1970	1971	1972	1973	1974
1	AUS	Australia	-0.102576	-0.111711	-0.116752	-0.0795043	-0.0575793	-0.0648424	-0.0778029	-0.0992784	-0.116684	-0.131269	-0.153645	-0.162178	-0.166273	-0.104322	-0.0906525	-0.0894562	-0.0834147	-0.134526	-0.145859	-0.171829	-0.195848	-0.20493	-0.227183	-0.241537	-0.263581	-0.302816	-0.35507	-0.378499	-0.408076	-0.443936	-0.474274	-0.506909	-0.542824	-0.564567	-0.586133	-0.624237	-0.708151	-0.755057	-0.758072	-0.790453	-0.821863	-0.88993	-0.939626	-0.972454	-1.01208	-1.05906	-1.17338
2	AUT	Austria	-0.0566834	-0.0713028	-0.0785943	-0.0712783	-0.0563781	-0.0479189	-0.0509326	-0.0575893	-0.0588248	-0.0660164	-0.0921004	-0.102355	-0.111496	-0.12496	-0.111737	-0.122121	-0.0898532	-0.0815137	-0.0787465	-0.0666115	-0.112522	-0.158757	-0.188259	-0.217598	-0.218286	-0.222281	-0.251241	-0.284397	-0.301869	-0.330536	-0.342437	-0.378284	-0.4334	-0.475147	-0.486228	-0.523898	-0.586207	-0.633193	-0.699553	-0.724722	-0.740901	-0.754693	-0.793463	-0.882614	-0.998244	-1.01917	-1.05806
3	BEL	Belgium	-0.233116	-0.282541	-0.288358	-0.301129	-0.239379	-0.226857	-0.224071	-0.249084	-0.266674	-0.323567	-0.339826	-0.310859	-0.313133	-0.170052	-0.143664	-0.130816	-0.135749	-0.137021	-0.230726	-0.298447	-0.368426	-0.354728	-0.410324	-0.488453	-0.486288	-0.536364	-0.532703	-0.566068	-0.576747	-0.590135	-0.550393	-0.581467	-0.586381	-0.621233	-0.63559	-0.638225	-0.732664	-0.757189	-0.763596	-0.776583	-0.781231	-0.83083	-0.880785	-0.908535	-0.931134	-0.936464	-0.974402
4	BGR	Bulgaria	-0.0141619	-0.0217863	-0.0265208	-0.0187574	-0.0229936	-0.0214134	-0.022788	-0.0224555	-0.0224554	-0.0244112	-0.0308181	-0.0320215	-0.0327409	-0.0262346	-0.0257385	-0.0257259	-0.0258339	-0.0415973	-0.0446004	-0.0524505	-0.0575625	-0.075596	-0.0921723	-0.107199	-0.116326	-0.123239	-0.136579	-0.14457	-0.154042	-0.16023	-0.170336	-0.239268	-0.271078	-0.302062	-0.330339	-0.380518	-0.449009	-0.471637	-0.506047	-0.584065	-0.623316	-0.643306	-0.670598	-0.70421	-0.715793	-0.753543	-0.775185
5	CAN	Canada	-0.227357	-0.282327	-0.290436	-0.267344	-0.156554	-0.0996565	-0.112494	-0.112016	-0.141361	-0.170106	-0.162788	-0.1686	-0.208395	-0.231995	-0.25386	-0.222743	-0.219748	-0.247004	-0.3155	-0.335149	-0.387914	-0.436381	-0.46442	-0.481759	-0.521475	-0.608971	-0.631626	-0.700022	-0.789711	-0.931988	-0.975038	-1.01153	-0.971553	-1.02766	-1.10773	-1.1645	-1.29454	-1.3836	-1.49416	-1.40191	-1.44558	-1.47841	-1.4649	-1.61434	-1.76353	-1.93818	-2.02818
6	HRV	Croatia	0	0	0	0	0	0	0	0	0	0	0	0	0	0	0	0	0	0	0	0	0	0	0	0	0	0	0	0	0	0	0	0	0	0	0	0	0	0	0	0	0	0	0	0	0	0	0
7	CYP	Cyprus	0	0	0	0	0	0	0	0	0	0	0	0	0	0	0	0	0	0	0	0	0	0	0	0	0	0	0	0	0	0	-0.0108716	-0.0123917	-0.0137574	-0.014979	-0.0157577	-0.016317	-0.0132673	-0.0167862	-0.0174693	-0.0293554	-0.0379369	-0.0405649	-0.0448282	-0.0510814	-0.0684431	-0.0754884	-0.0632936
8	CZE	Czechia	0	0	0	0	-0.109977	-0.103388	-0.115087	-0.127899	-0.140693	-0.177856	-0.187256	-0.193901	-0.199474	-0.0965976	-0.0865905	-0.0851556	-0.0831904	-0.11248	-0.143905	-0.199498	-0.236044	-0.256098	-0.279226	-0.309417	-0.333198	-0.354571	-0.389097	-0.434619	-0.47518	-0.543526	-0.608041	-0.689688	-0.751005	-0.805357	-0.88092	-0.839971	-0.883109	-0.923706	-0.985476	-1.01659	-1.07715	-1.14154	-1.20799	-1.27011	-1.28436	-1.31529	-1.36691
9	DNK	Denmark	-0.111421	-0.129212	-0.133443	-0.0989717	-0.0836406	-0.102143	-0.135784	-0.139737	-0.147804	-0.134232	-0.129194	-0.137571	-0.10308	-0.0968694	-0.097625	-0.126819	-0.132021	-0.0731794	-0.106898	-0.128809	-0.151964	-0.165852	-0.175339	-0.194684	-0.231721	-0.245957	-0.245842	-0.254249	-0.247407	-0.245972	-0.233725	-0.279806	-0.294482	-0.319877	-0.332555	-0.322442	-0.378315	-0.402023	-0.424342	-0.446388	-0.464969	-0.519088	-0.53031	-0.551392	-0.556535	-0.576506	-0.524861
10	FIN	Finland	-0.0298573	-0.0337895	-0.0277937	-0.0236938	-0.0227877	-0.0238879	-0.032598	-0.0386908	-0.0454084	-0.0554521	-0.0647053	-0.0765766	-0.0795989	-0.0543637	-0.0385795	-0.0426459	-0.0364729	-0.0460313	-0.0527136	-0.0634441	-0.0803054	-0.0943485	-0.107155	-0.11994	-0.118273	-0.137147	-0.15235	-0.158465	-0.151613	-0.151476	-0.150798	-0.178281	-0.192273	-0.206178	-0.212488	-0.22379	-0.243324	-0.26991	-0.254145	-0.251312	-0.249222	-0.281207	-0.299759	-0.298954	-0.320946	-0.338445	-0.356349
11	FRA	France	-0.396013	-0.598732	-0.57652	-0.599327	-0.639506	-0.62007	-0.627456	-0.575659	-0.215584	-0.176873	-0.160124	-0.152159	-0.141983	-0.427907	-0.381234	-0.428024	-0.306142	-0.299111	-0.469355	-0.53932	-0.702096	-0.836384	-0.945039	-1.06706	-1.1551	-1.25387	-1.3325	-1.4507	-1.54455	-1.7056	-1.84392	-1.95034	-2.0155	-2.18491	-2.35019	-2.54441	-2.92981	-3.10684	-3.27756	-3.47848	-3.63648	-3.91696	-4.15035	-4.22997	-4.41894	-4.53197	-4.75831
12	DEU	Germany	-0.745236	-0.80214	-0.702181	-0.541198	-0.452565	-0.547434	-0.828143	-1.09251	-1.42306	-1.60926	-1.91434	-2.00091	-1.90074	-1.73221	-1.33725	-1.47192	-0.850428	-0.763301	-0.726405	-0.750528	-0.996956	-1.31082	-1.60503	-1.96471	-2.15217	-2.54204	-2.74826	-3.11233	-3.34062	-3.41781	-3.50851	-3.98203	-4.35503	-4.72417	-5.01355	-5.20213	-5.77725	-6.02111	-6.25062	-6.1318	-6.43049	-6.69077	-7.18419	-7.60531	-7.9275	-7.92761	-7.56034
13	GRC	Greece	-0.0161195	-0.0197274	-0.0239977	-0.0271314	-0.0285605	-0.0300317	-0.036306	-0.0407209	-0.0427475	-0.0454924	-0.0488064	-0.0502117	-0.051361	-0.0251549	-0.0182222	-0.0129872	-0.0114259	-0.0165712	-0.0221574	-0.031726	-0.0452265	-0.0522298	-0.0663327	-0.0698866	-0.0903069	-0.111618	-0.129276	-0.165574	-0.186564	-0.192969	-0.211383	-0.229781	-0.25841	-0.289659	-0.301843	-0.358639	-0.415007	-0.491639	-0.554683	-0.560796	-0.644322	-0.752099	-0.782984	-0.878232	-0.955331	-1.03552	-1.12131
14	HUN	Hungary	-0.0559781	-0.0607543	-0.0542756	-0.050841	-0.0383648	-0.0352412	-0.0406809	-0.0487788	-0.0418247	-0.0648805	-0.0687585	-0.070676	-0.0720912	-0.109325	-0.123137	-0.124009	-0.0545	-0.0315471	-0.043151	-0.0490686	-0.0411201	-0.105105	-0.134716	-0.161113	-0.185142	-0.189274	-0.180817	-0.210217	-0.192636	-0.192563	-0.235354	-0.260175	-0.285296	-0.296701	-0.319001	-0.335105	-0.40184	-0.431853	-0.471197	-0.490237	-0.518779	-0.497961	-0.52881	-0.527005	-0.562298	-0.62556	-0.641027
15	IRL	Ireland	0	0	0	0	0	0	0	0	0	0	-0.0135281	-0.0340177	-0.038939	-0.0437545	-0.0342928	-0.0401998	-0.0378035	-0.0344253	-0.0476947	-0.048747	-0.0630141	-0.0725633	-0.0741415	-0.0736125	-0.0789057	-0.0819244	-0.0988654	-0.111359	-0.120334	-0.100017	-0.0989717	-0.100389	-0.10632	-0.133042	-0.154114	-0.146417	-0.169138	-0.18372	-0.195883	-0.223098	-0.236362	-0.232121	-0.184041	-0.259408	-0.269678	-0.285181	-0.303461
16	ITA	Italy	-0.449253	-0.571042	-0.603697	-0.564726	-0.578725	-0.650967	-0.746632	-0.78405	-0.751274	-0.83023	-0.884257	-0.929548	-0.652969	-0.626057	-0.539313	-0.45	-0.382974	-0.340116	-0.458202	-0.583016	-0.654341	-0.801075	-0.969348	-1.08711	-1.27451	-0.343729	-0.237453	-0.198836	-0.178576	-0.165345	-2.02811	-2.50334	-2.87462	-3.27955	-3.70112	-4.09753	-4.32124	-4.10059	-4.37362	-5.01712	-5.61658	-6.05977	-6.42416	-6.32995	-6.59978	-7.06759	-7.1558
17	LUX	Luxembourg	0	0	0	0	0	0	0	0	0	0	0	0	0	0	0	0	0	-0.00656302	-0.0107638	-0.0135064	-0.0159366	-0.0191539	-0.0205184	-0.0220743	-0.0189759	-0.0246294	-0.0261036	-0.0275648	-0.0289627	-0.0295616	-0.0343667	-0.0348808	-0.0378414	-0.0414509	-0.0423554	-0.0395118	-0.0399072	-0.042513	-0.0418853	-0.0384255	-0.039341	-0.041731	-0.0472698	-0.0506407	-0.057848	-0.0657379	-0.0720345
18	NLD	Netherlands	0	0	0	0	-0.0294712	-0.0459557	-0.0536997	-0.0525823	-0.0587627	-0.0654073	-0.069329	-0.0810696	-0.083991	-0.0767399	-0.0665664	-0.0645515	-0.0478663	-0.0478203	-0.0673262	-0.0835484	-0.094959	-0.0938155	-0.100059	-0.114832	-0.131155	-0.140869	-0.143713	-0.174943	-0.19928	-0.213342	-0.224269	-0.256454	-0.287338	-0.308259	-0.329167	-0.344711	-0.443805	-0.474356	-0.509698	-0.544446	-0.567748	-0.5632	-0.632442	-0.655342	-0.647123	-0.641728	-0.630326
19	NOR	Norway	-0.0164092	-0.0190016	-0.0207849	-0.0169175	-0.0180202	-0.017932	-0.0197733	-0.0211685	-0.023264	-0.0256751	-0.0272123	-0.0311322	-0.024141	-0.0281761	-0.0320618	-0.0299453	-0.0308893	-0.0221652	-0.0364599	-0.0402683	-0.0446334	-0.0497461	-0.0512095	-0.0588485	-0.0613505	-0.065779	-0.0686138	-0.0720639	-0.0799888	-0.086412	-0.0913715	-0.0992375	-0.103441	-0.110258	-0.122907	-0.12846	-0.137466	-0.144747	-0.160323	-0.177993	-0.196253	-0.213396	-0.226857	-0.239522	-0.242495	-0.251747	-0.252763
20	POL	Poland	-0.154245	-0.162669	-0.145747	-0.107695	-0.0780471	-0.0825316	-0.126277	-0.149721	-0.184061	-0.225298	-0.294875	-0.308746	-0.257953	-0.115788	-0.0982561	-0.0918733	-0.0885828	-0.0866067	-0.239588	-0.277095	-0.330851	-0.396447	-0.436296	-0.492911	-0.503803	-0.602314	-0.637689	-0.709858	-0.759831	-0.84062	-0.942068	-1.00412	-1.20549	-1.35491	-1.42021	-1.46865	-1.64723	-1.80349	-1.91324	-2.10704	-2.22287	-2.29935	-2.38615	-2.51754	-2.65054	-2.86838	-3.04614
21	PRT	Portugal	-0.0133235	-0.0171685	-0.020064	-0.0201365	-0.0250713	-0.0335195	-0.0386899	-0.0450224	-0.0518617	-0.0549784	-0.0585544	-0.0647454	-0.0616578	-0.0621209	-0.0576571	-0.0580765	-0.058057	-0.0615113	-0.0733754	-0.0930983	-0.108766	-0.116149	-0.127476	-0.14239	-0.160629	-0.17194	-0.180388	-0.17988	-0.224431	-0.218799	-0.233595	-0.238505	-0.270456	-0.284702	-0.316886	-0.328906	-0.366754	-0.384691	-0.397687	-0.423113	-0.434021	-0.469664	-0.529422	-0.563158	-0.631961	-0.734806	-0.753581
22	ROU	Romania	-0.0434869	-0.0475999	-0.060517	-0.0375509	-0.0382039	-0.0393701	-0.0522139	-0.0606019	-0.0647321	-0.0769597	-0.0786938	-0.0911758	-0.0769352	-0.105381	-0.102124	-0.140222	-0.0891401	-0.0652182	-0.0701329	-0.0840131	-0.0898522	-0.105553	-0.120378	-0.188033	-0.246386	-0.310839	-0.297954	-0.343258	-0.379691	-0.421507	-0.453463	-0.501428	-0.541728	-0.588494	-0.626882	-0.756272	-0.833357	-0.943011	-1.0348	-1.12261	-1.24155	-1.33941	-1.45227	-1.52199	-1.62246	-1.71704	-1.89628
23	SVK	Slovakia	0	0	0	0	0	0	0	0	0	0	0	0	0	0	0	0	0	0	0	0	0	0	0	0	0	0	0	0	0	0	0	0	0	0	0	0	0	0	0	0	0	0	0	0	0	0	0
24	SVN	Slovenia	0	0	0	0	0	0	0	0	0	0	0	0	0	0	0	0	0	0	0	0	0	0	0	0	0	0	0	0	0	0	0	0	0	0	0	0	0	0	0	0	0	0	0	0	0	0	0
25	ESP	Spain	-0.204814	-0.269445	-0.28937	-0.272294	-0.249139	-0.247754	-0.244177	-0.245248	-0.14731	-0.142872	-0.13254	-0.210354	-0.268582	-0.290549	-0.298958	-0.311587	-0.33563	-0.353331	-0.388679	-0.402805	-0.428601	-0.425365	-0.465954	-0.504504	-0.543978	-0.594079	-0.680957	-0.768912	-0.799836	-0.87995	-0.957653	-1.03956	-1.06588	-1.19229	-1.19654	-1.38541	-1.52292	-1.65542	-2.03709	-2.2816	-2.59411	-2.78	-2.96772	-3.0674	-3.44076	-3.91084	-4.1876
26	SWE	Sweden	-0.0478071	-0.065422	-0.0749935	-0.0696956	-0.0679408	-0.0610131	-0.079637	-0.0992246	-0.109646	-0.121969	-0.138349	-0.163146	-0.120511	-0.112273	-0.129874	-0.143123	-0.161013	-0.1815	-0.212776	-0.22993	-0.230488	-0.25665	-0.289248	-0.308001	-0.32463	-0.356674	-0.378435	-0.396677	-0.400139	-0.401906	-0.414117	-0.452447	-0.461779	-0.490807	-0.505402	-0.539355	-0.584312	-0.613747	-0.618319	-0.6427	-0.661528	-0.676992	-0.698854	-0.685429	-0.682647	-0.738732	-0.660424
27	CHE	Switzerland	-0.0907583	-0.111866	-0.133081	-0.147865	-0.0306203	-0.0174866	-0.0129191	-0.0106589	-0.0826042	-0.112062	-0.118727	-0.122409	-0.125071	-0.13602	-0.0999069	-0.0863694	-0.0934789	-0.0920595	-0.132483	-0.18174	-0.191412	-0.189116	-0.210108	-0.249251	-0.2673	-0.301994	-0.34441	-0.397834	-0.44826	-0.46087	-0.442002	-0.517003	-0.582185	-0.679531	-0.719115	-0.714177	-0.829888	-0.812532	-0.863062	-0.856517	-0.885915	-0.928149	-0.979811	-1.05402	-1.14176	-1.16843	-1.11113
28	GBR	United Kingdom	-0.466514	-0.574904	-0.653542	-0.780601	-0.643664	-0.662004	-0.760581	-0.851824	-0.965386	-1.06334	-1.16189	-1.30423	-1.16806	-1.20305	-1.22974	-1.19943	-0.962901	-0.872658	-1.12887	-1.20577	-1.40009	-1.51948	-1.61865	-1.70822	-1.84445	-1.89883	-2.01509	-2.11792	-2.18808	-2.141	-2.12968	-2.24873	-2.36033	-2.49442	-2.52863	-2.54312	-2.88035	-2.97869	-2.98691	-3.11302	-3.19464	-3.19347	-3.18805	-3.30457	-3.36319	-3.60684	-3.43863
29	USA	USA	-3.40384	-3.91024	-4.08918	-3.55077	-2.69787	-2.39782	-2.65128	-2.65593	-3.41368	-3.67275	-3.55521	-3.96112	-4.25749	-5.04578	-5.6155	-4.94872	-4.08343	-4.22872	-5.47276	-6.15558	-6.78203	-7.10841	-7.60891	-8.25843	-8.56775	-9.06695	-9.44346	-10.2139	-10.9083	-10.9127	-11.2809	-12.0548	-12.0396	-12.2106	-12.6593	-13.2313	-13.8452	-14.1907	-14.7257	-14.7867	-15.3707	-15.7209	-15.7965	-16.1188	-16.557	-16.8822	-17.0854
30	MEX	Mexico	-0.0350803	-0.0411511	-0.00672997	-0.00319155	-0.0429725	-0.0478527	-0.0498285	-0.0510377	-0.0575129	-0.0685195	-0.0754346	-0.0832052	-0.0974427	-0.108899	-0.120051	-0.121301	-0.136718	-0.152567	-0.155871	-0.153247	-0.174851	-0.242891	-0.301671	-0.328396	-0.34093	-0.351429	-0.370159	-0.419182	-0.471817	-0.529548	-0.539438	-0.574867	-0.646544	-0.653091	-0.712639	-0.793446	-0.918338	-0.925098	-1.03558	-1.27893	-1.30157	-1.43092	-1.52636	-1.57558	-1.78771	-2.0077	-2.17237
31	BRA	Brazil	-0.0141384	-0.0172307	-0.0166772	-0.0298485	-0.0288821	-0.0411411	-0.0594818	-0.0688289	-0.0904492	-0.108517	-0.119837	-0.135827	-0.146853	-0.153878	-0.154304	-0.154916	-0.166338	-0.163245	-0.172642	-0.188916	-0.224127	-0.257551	-0.280604	-0.298482	-0.329994	-0.40297	-0.491237	-0.551246	-0.649584	-0.682398	-0.761657	-0.78733	-0.900857	-0.96054	-1.03655	-1.07388	-1.15962	-1.17243	-1.26017	-1.33801	-1.4995	-1.61862	-1.70084	-1.8433	-2.10583	-2.44976	-2.73747
32	EGY	Egypt	-0.00913406	-0.0195525	-0.033661	-0.0303799	-0.0314968	-0.036937	-0.0392602	-0.0487223	-0.0463485	-0.046613	-0.0520205	-0.0530438	-0.0529143	-0.0596649	-0.0613452	-0.0525441	-0.0623938	-0.0648705	-0.0818493	-0.091214	-0.106249	-0.113214	-0.136524	-0.154917	-0.141653	-0.158012	-0.186135	-0.19612	-0.198858	-0.214051	-0.223633	-0.254848	-0.269883	-0.304954	-0.315337	-0.358313	-0.370101	-0.367676	-0.393646	-0.412439	-0.461921	-0.521413	-0.543853	-0.57833	-0.567628	-0.564662	-0.533933
33	TUR	Türkiye	-0.0103791	-0.0127549	-0.0120052	-0.019752	-0.0223025	-0.0247776	-0.034316	-0.029292	-0.0373756	-0.0451765	-0.0559408	-0.0607499	-0.0591783	-0.0608095	-0.0505918	-0.03933	-0.0615131	-0.0646752	-0.0719474	-0.0782571	-0.0787881	-0.0844622	-0.0882684	-0.0910565	-0.103157	-0.117491	-0.15192	-0.177393	-0.208882	-0.266361	-0.321378	-0.3704	-0.434617	-0.445872	-0.50416	-0.58269	-0.640798	-0.723296	-0.835265	-0.925146	-1.03071	-1.24228	-1.38157	-1.61405	-1.80414	-1.92958	-2.17844
34	IRN	Iran	0	0	0	0	0	0	0	0	-0.00816126	-0.00928324	-0.0098044	-0.0272152	-0.0127664	-0.0117362	-0.0115693	-0.00862076	-0.00873199	-0.00677184	-0.00914245	-0.00941255	-0.012819	-0.0124341	-0.0134187	-0.0138379	-0.014791	-0.014338	-0.0140147	-0.0167465	-0.0285055	-0.0278085	-0.068621	-0.0997461	-0.138554	-0.138991	-0.142756	-0.145922	-0.14866	-0.157001	-0.250397	-0.26535	-0.354349	-0.431032	-0.483766	-0.540126	-0.562552	-0.66207	-0.743798
35	SAU	Saudi Arabia	0	0	0	0	0	0	0	0	0	0	0	0	0	0	0	0	0	0	0	0	0	0	0	0	0	0	0	0	0	0	-0.399114	-0.0548944	-0.0246231	-0.0313858	-0.036561	-0.042759	-0.0525712	-0.0531865	-0.0534129	-0.0691024	-0.0945749	-0.105975	-0.126415	-0.13498	-0.171038	-0.183131	-0.195946
36	IND	India	-0.0828867	-0.094738	-0.122608	-0.109234	-0.111124	-0.117625	-0.141145	-0.164339	-0.182425	-0.211931	-0.255557	-0.301799	-0.349467	-0.398187	-0.422677	-0.422248	-0.418564	-0.438284	-0.414607	-0.343461	-0.352303	-0.435033	-0.523413	-0.628641	-0.701094	-0.757497	-0.863464	-0.906688	-0.991257	-1.11476	-1.21963	-1.35596	-1.52708	-1.62896	-1.71599	-1.86408	-1.95716	-2.12651	-2.24537	-2.38583	-2.4716	-2.70893	-2.81519	-3.05654	-3.24309	-3.19563	-3.12279
37	CHN	China	-0.0338023	-0.0542001	-0.0696117	-0.0770631	-0.0416889	-0.0489466	-0.0442382	-0.0406112	-0.0735179	-0.125279	-0.137432	-0.211877	-0.240376	-0.214615	-0.267706	-0.273518	-0.231102	-0.128664	-0.0873642	-0.133245	-0.158869	-0.224819	-0.130806	-0.239144	-0.35466	-0.622416	-0.766198	-0.791946	-1.07328	-1.18055	-1.55654	-2.03216	-2.30061	-1.91736	-1.77876	-1.91586	-2.01998	-2.1414	-2.19081	-1.82995	-1.96038	-2.12593	-2.1713	-2.45469	-2.75501	-4.18077	-4.37489
38	KOR	South Korea	0	0	0	0	0	0	0	0	0	0	0	0	0	-0.112941	-0.119284	-0.146032	-0.12061	-0.03575	-0.0257831	-0.022007	-0.019425	-0.0182955	-0.0159383	-0.0146249	-0.0163113	-0.016736	-0.0242657	-0.032437	-0.0450743	-0.065632	-0.10274	-0.131598	-0.163575	-0.195799	-0.236067	-0.242146	-0.271635	-0.282941	-0.282825	-0.311736	-0.40422	-0.531679	-0.644804	-0.771149	-0.787104	-0.952773	-1.05796
39	JPN	Japan	-0.334781	-0.42386	-0.412541	-0.418291	-0.442433	-0.54882	-0.605442	-0.695126	-0.755399	-0.823732	-0.748988	-0.717545	-0.6515	-0.787122	-0.683584	-0.62997	-0.55877	-0.390931	-0.342762	-0.352442	-0.399107	-0.526169	-0.648745	-0.857488	-1.0467	-1.41032	-1.86261	-2.13376	-2.48849	-2.76806	-2.87211	-3.22304	-3.8854	-4.31932	-4.86972	-5.12319	-5.43972	-5.47614	-5.99625	-6.52416	-7.05357	-7.42457	-7.937	-8.1931	-8.39367	-10.1156	-10.2091
40	VNM	Vietnam	0	0	0	0	0	0	0	0	0	0	0	0	0	0	0	0	0	0	0	0	0	0	0	0	0	-0.0443358	-0.0448776	-0.0539332	-0.0640287	-0.066742	-0.0612439	-0.0735554	-0.0799572	-0.089265	-0.0944215	-0.0997676	-0.13738	-0.177641	-0.176933	-0.186897	-0.147348	-0.160063	-0.16886	-0.167702	-0.127538	-0.164576	-0.159073
41	IDN	Indonesia	0	0	0	0	0	0	0	0	0	0	0	0	0	-0.045038	-0.00607297	-0.00267926	-0.00173578	-0.00132729	-0.00109441	-0.00245129	-0.00672203	-0.00163543	-0.0011257	-0.0170169	-0.0246544	-0.0283116	-0.0294973	-0.0305516	-0.0248137	-0.0315555	-0.0552903	-0.0656926	-0.0751636	-0.0868202	-0.100203	-0.0768179	-0.0921689	-0.0840755	-0.0806738	-0.0755462	-0.0932242	-0.116743	-0.124872	-0.129006	-0.134891	-0.165864	-0.189403
42	ZAF	South Africa	0	0	0	0	0	0	0	0	0	0	0	0	0	0	0	0	0	0	0	0	0	0	0	0	0	-0.219501	-0.255394	-0.290458	-0.318918	-0.337609	-0.369027	-0.373446	-0.388021	-0.385798	-0.398343	-0.428937	-0.498053	-0.558842	-0.587514	-0.584324	-0.655873	-0.733989	-0.835086	-0.871801	-0.917374	-1.01346	-1.08419
		ROW	-0.339893	-0.477288	-0.610781	-0.700376	-0.772589	-0.702981	-0.83694	-1.0238	-1.24899	-1.4185	-1.38663	-1.41483	-1.48311	-1.55759	-1.57755	-1.60669	-1.63408	-1.19395	-1.44308	-1.69893	-2.00119	-2.32769	-2.90759	-3.47719	-4.14234	-4.60081	-5.39017	-6.23864	-6.89512	-7.82949	-8.95461	-10.2126	-11.5261	-12.8423	-14.1029	-15.4267	-16.6641	-18.4422	-20.2666	-21.5944	-23.0666	-24.2296	-25.9439	-27.3939	-29.4694	-30.8973	-32.2341
		Total	-7.73907	-9.30416	-9.69447	-9.03556	-7.85854	-7.74831	-8.90068	-9.7022	-11.0159	-12.2285	-12.7272	-13.7658	-13.6103	-14.5562	-14.4873	-13.9044	-11.8011	-11.0176	-13.5253	-15.1596	-17.3454	-19.4489	-21.8356	-24.7524	-27.112	-29.3329	-32.0884	-35.4118	-38.5434	-40.8933	-46.1506	-50.961	-55.269	-59.0013	-62.9394	-67.0725	-72.8044	-76.6812	-81.9706	-85.7989	-91.3293	-96.3373	-101.396	-106.186	-112.249	-120.555	-123.989
[truncated: 50 more columns]

## Sheet: SI data4
SI data 4. Process carbon emissions from cement production by region and category, 1928-2024
unit: million tons (Mt) CO2
code	ISO	Countries	1928	1929	1930	1931	1932	1933	1934	1935	1936	1937	1938	1939	1940	1941	1942	1943	1944	1945	1946	1947	1948	1949	1950	1951	1952	1953	1954	1955	1956	1957	1958	1959	1960	1961	1962	1963	1964	1965	1966	1967	1968	1969	1970	1971	1972	1973	1974
1	AUS	Australia	0.400622	0.376564	0.370288	0.20711	0.131274	0.1705	0.218093	0.29236	0.343092	0.381794	0.451113	0.461175	0.459722	0.204062	0.176748	0.184039	0.164211	0.368405	0.384095	0.468822	0.538487	0.547901	0.615682	0.646435	0.709719	0.835808	1.00101	1.04133	1.11661	1.21446	1.28609	1.36771	1.46021	1.4942	1.53398	1.6313	1.8964	1.98846	1.92156	1.99631	2.05438	2.25419	2.35807	2.39452	2.4649	2.55856	2.90866
2	AUT	Austria	0.278236	0.309624	0.320264	0.266	0.186732	0.14896	0.16758	0.197372	0.196308	0.226632	0.3458	0.3724	0.399	0.447944	0.362824	0.411236	0.2394	0.2128	0.206246	0.149636	0.383774	0.580418	0.681173	0.784672	0.745864	0.741573	0.862885	0.989006	1.02993	1.13264	1.14598	1.28589	1.50556	1.64066	1.62633	1.76197	2.00514	2.15141	2.39457	2.41953	2.42225	2.42488	2.55641	2.92072	3.37477	3.32942	3.42254
3	BEL	Belgium	1.53366	1.63537	1.53568	1.53568	1.05735	0.981825	0.95665	1.1077	1.18322	1.51454	1.53776	1.28481	1.28481	0.317497	0.257122	0.231368	0.3021	0.325713	0.951503	1.31372	1.67713	1.47274	1.79107	2.21288	2.0699	2.32924	2.20283	2.36093	2.3483	2.369	2.04268	2.23504	2.20936	2.39261	2.41546	2.37097	2.94349	2.97321	2.91833	2.93036	2.89017	3.15646	3.38715	3.4574	3.50608	3.44798	3.62319
4	BGR	Bulgaria	0.055404	0.077463	0.089262	0.053352	0.071307	0.062073	0.06669	0.063612	0.062586	0.069255	0.09234	0.09234	0.09234	0.0646606	0.0646606	0.0646606	0.0646606	0.125736	0.12825	0.1539	0.166725	0.23085	0.28215	0.32574	0.345776	0.3596	0.40011	0.416559	0.440707	0.451469	0.479117	0.735125	0.813082	0.897251	0.971096	1.13121	1.35038	1.37541	1.46517	1.72267	1.80378	1.82224	1.88117	1.96418	1.95788	2.06504	2.09806
5	CAN	Canada	0.925868	1.02377	0.985347	0.852178	0.387928	0.201596	0.291077	0.291604	0.412667	0.513323	0.461194	0.478922	0.631708	0.699316	0.762601	0.610203	0.600891	0.70792	0.966031	0.99743	1.18051	1.33004	1.39318	1.42119	1.5475	1.85803	1.8749	2.10337	2.3981	2.88871	2.93817	3.00083	2.76338	2.9634	3.22347	3.34978	3.77719	3.98878	4.29356	3.76875	3.89937	3.93932	3.79302	4.32461	4.77095	5.29845	5.44156
6	HRV	Croatia	0	0	0	0	0	0	0	0	0	0	0	0	0	0	0	0	0	0	0	0	0	0	0	0	0	0	0	0	0	0	0	0	0	0	0	0	0	0	0	0	0	0	0	0	0	0	0
7	CYP	Cyprus	0	0	0	0	0	0	0	0	0	0	0	0	0	0	0	0	0	0	0	0	0	0	0	0	0	0	0	0	0	0	0.0418205	0.0418205	0.0443108	0.0468012	0.0478317	0.0483469	0.0352082	0.0493774	0.0498068	0.0941176	0.119794	0.12237	0.133806	0.152529	0.21281	0.226967	0.17034
8	CZE	Czechia	0	0	0	0	0.544283	0.427975	0.458185	0.49343	0.528675	0.68476	0.68476	0.68476	0.68476	0.15105	0.16112	0.176225	0.176225	0.327275	0.46322	0.706914	0.830775	0.875083	0.944063	1.04732	1.11275	1.16814	1.29	1.45616	1.58506	1.84886	2.06939	2.36651	2.54324	2.69025	2.94547	2.60713	2.76574	2.87651	3.08647	3.1258	3.32587	3.52594	3.72601	3.89708	3.82931	3.87762	4.0271
9	DNK	Denmark	0.407028	0.417478	0.407028	0.265953	0.216838	0.289465	0.402325	0.395533	0.414013	0.353275	0.334378	0.36366	0.230423	0.220044	0.227165	0.333897	0.337972	0.114948	0.262209	0.331035	0.401836	0.435765	0.456143	0.514635	0.633246	0.658376	0.638504	0.657841	0.619701	0.608739	0.558033	0.726281	0.753461	0.827604	0.850596	0.794721	0.991753	1.04264	1.09611	1.14957	1.1903	1.3622	1.36011	1.40945	1.39887	1.45003	1.2346
10	FIN	Finland	0.133	0.13205	0.096425	0.07695	0.07315	0.077425	0.114475	0.1349	0.157965	0.194926	0.225702	0.267425	0.267425	0.145866	0.084931	0.113183	0.085605	0.131898	0.156651	0.198425	0.264005	0.311592	0.352925	0.393804	0.369581	0.445085	0.494017	0.501632	0.456022	0.449379	0.439414	0.555749	0.595202	0.637005	0.644539	0.678322	0.746696	0.840752	0.739567	0.719152	0.701086	0.835568	0.890084	0.860074	0.942537	0.993993	1.04676
11	FRA	France	2.09456	2.85878	2.46457	2.46457	2.56831	2.3544	2.33069	1.9923	0.073606	0.115911	0.131585	0.151065	0.137579	1.68245	1.23333	1.44557	0.733867	0.752856	1.66577	1.90437	2.65723	3.18284	3.56075	4.01375	4.27064	4.59965	4.81458	5.24924	5.52543	6.16323	6.62654	6.91553	7.00155	7.67187	8.24985	8.95825	10.6394	11.0484	11.5122	12.1525	12.5443	13.6065	14.328	14.2355	14.8296	14.9717	15.7584
12	DEU	Germany	3.81452	3.54414	2.77479	1.87201	1.45411	1.97926	3.33569	4.43181	5.80535	6.34662	7.5525	7.5525	6.72122	5.71422	3.669	4.56826	1.30688	1.27335	1.27335	1.50859	2.81013	4.25961	5.47657	6.97175	7.49025	9.11893	9.66174	11.0886	11.71	11.6123	11.7019	13.7803	15.0733	16.3231	17.1332	17.459	19.8376	20.2509	20.7388	19.4833	20.6408	21.393	23.3132	24.6698	25.4943	24.7121	22.2925
13	GRC	Greece	0.074385	0.079515	0.09234	0.100035	0.100548	0.1026	0.127224	0.140049	0.142024	0.14877	0.158004	0.158004	0.158004	0.032319	0.01539	0	0	0.028215	0.052839	0.093366	0.147744	0.167238	0.221616	0.222147	0.305792	0.382699	0.438082	0.57921	0.635119	0.628469	0.68744	0.740812	0.839767	0.942398	0.951497	1.17679	1.37077	1.64777	1.8407	1.76983	2.09259	2.48299	2.48652	2.82619	3.0452	3.27822	3.53091
14	HUN	Hungary	0.222585	0.210567	0.171902	0.15466	0.102933	0.0945725	0.117563	0.1463	0.112337	0.20482	0.206388	0.206388	0.206388	0.349725	0.380479	0.366424	0.080094	0.0200013	0.0854758	0.109234	0.0757625	0.3344	0.418	0.495475	0.564093	0.553845	0.503763	0.613908	0.519893	0.516774	0.680298	0.748738	0.820831	0.83705	0.902906	0.939442	1.17925	1.2451	1.35899	1.38778	1.46352	1.33974	1.44779	1.40566	1.52453	1.7377	1.74061
15	IRL	Ireland	0	0	0	0	0	0	0	0	0	0	0.0573683	0.136119	0.141856	0.15333	0.105349	0.131415	0.116048	0.100134	0.156459	0.151765	0.207569	0.236253	0.231559	0.222194	0.239895	0.245413	0.310726	0.348947	0.372079	0.272255	0.271739	0.275919	0.297267	0.40365	0.472496	0.417793	0.507453	0.548637	0.58048	0.67699	0.705098	0.663914	0.447958	0.785496	0.783859	0.825055	0.877871
16	ITA	Italy	1.55512	1.76738	1.7598	1.55512	1.57937	1.79619	2.0681	2.12066	1.95034	2.2031	2.32861	2.42592	1.41186	1.41186	1.13377	0.865339	0.682266	0.577707	1.0204	1.41011	1.58888	2.04005	2.52879	2.8191	3.36197	0	0	0	0	0	6.48078	7.2788	8.09354	9.11292	10.1875	11.1634	11.5434	10.4593	11.3079	13.278	14.8919	15.9194	16.7132	15.9525	16.6684	17.9627	17.8328
17	LUX	Luxembourg	0	0	0	0	0	0	0	0	0	0	0	0	0	0	0	0	0	0.0244461	0.036718	0.0436471	0.0498701	0.0591596	0.0611153	0.0645419	0.0506996	0.07188	0.0737979	0.0767998	0.0797184	0.0797184	0.0958122	0.0938942	0.10265	0.112907	0.11249	0.099231	0.100232	0.10857	0.103651	0.0894747	0.0933939	0.101232	0.119732	0.128158	0.151217	0.17472	0.191128
18	NLD	Netherlands	0	0	0	0	0.130302	0.18468	0.202122	0.18468	0.205713	0.226233	0.233928	0.277533	0.277533	0.236493	0.18981	0.183654	0.109782	0.118503	0.206562	0.266381	0.302155	0.283192	0.304106	0.360125	0.417084	0.44167	0.438257	0.564774	0.644306	0.677204	0.700739	0.820781	0.922362	0.976258	1.03374	1.0676	1.47384	1.5252	1.62266	1.71803	1.76274	1.69091	1.96446	1.99355	1.90207	1.84555	1.76843
19	NOR	Norway	0.15402	0.154504	0.155473	0.106554	0.11382	0.107523	0.1206	0.127381	0.140458	0.155221	0.160607	0.188892	0.111398	0.151516	0.180972	0.150703	0.155827	0.0686792	0.211274	0.228904	0.254853	0.286818	0.282466	0.340005	0.341905	0.365695	0.372965	0.387503	0.443675	0.47903	0.499351	0.547758	0.557506	0.594761	0.683893	0.696449	0.746342	0.776411	0.884872	1.00069	1.11253	1.20695	1.26341	1.31458	1.27588	1.31016	1.26467
20	POL	Poland	0.5518	0.50657	0.418122	0.274392	0.177903	0.206548	0.362339	0.42365	0.526672	0.647841	0.864111	0.864111	0.653315	0.15122	0.15122	0.15122	0.15122	0.15122	0.703025	0.764792	0.916579	1.10561	1.19406	1.3509	1.33676	1.65544	1.71021	1.91626	2.02777	2.25542	2.54195	2.67206	3.31284	3.70077	3.79129	3.8566	4.40284	4.81091	5.04611	5.5974	5.82968	5.94531	6.11974	6.45444	6.77414	7.39008	7.8166
21	PRT	Portugal	0.0366054	0.0423852	0.0476833	0.0457567	0.0582797	0.0789906	0.0891052	0.103073	0.118004	0.122339	0.129082	0.14305	0.13061	0.131009	0.11733	0.118871	0.117992	0.126664	0.157211	0.206018	0.239895	0.251149	0.275768	0.309202	0.350193	0.370401	0.384531	0.375248	0.493211	0.458052	0.493211	0.496579	0.577002	0.599674	0.67566	0.6902	0.781219	0.809149	0.828454	0.884314	0.89639	0.980673	1.12316	1.18344	1.34596	1.58972	1.58666
22	ROU	Romania	0.167329	0.159769	0.199585	0.0987844	0.107352	0.11088	0.158257	0.181945	0.189505	0.229982	0.225995	0.267625	0.201601	0.312743	0.282743	0.423606	0.201601	0.126	0.158761	0.212689	0.227809	0.282241	0.327601	0.574552	0.756012	0.95561	0.849364	1.00349	1.10174	1.22019	1.29627	1.4369	1.53927	1.66727	1.75847	2.20202	2.395	2.72465	2.96654	3.19442	3.54118	3.78763	4.09497	4.22602	4.49317	4.72441	5.27999
23	SVK	Slovakia	0	0	0	0	0	0	0	0	0	0	0	0	0	0	0	0	0	0	0	0	0	0	0	0	0	0	0	0	0	0	0	0	0	0	0	0	0	0	0	0	0	0	0	0	0	0	0
24	SVN	Slovenia	0	0	0	0	0	0	0	0	0	0	0	0	0	0	0	0	0	0	0	0	0	0	0	0	0	0	0	0	0	0	0	0	0	0	0	0	0	0	0	0	0	0	0	0	0	0	0
25	ESP	Spain	0.774932	0.914641	0.924189	0.819156	0.716134	0.707088	0.684473	0.680955	0.30153	0.326657	0.297724	0.600286	0.782912	0.824143	0.827338	0.855099	0.926218	0.967937	1.07804	1.09874	1.17137	1.12954	1.26698	1.37799	1.48856	1.63632	1.91574	2.17708	2.21376	2.46001	2.67661	2.90426	2.91583	3.33093	3.23845	3.8938	4.2717	4.63306	5.93365	6.58292	7.51529	7.92739	8.39197	8.52806	9.74421	11.1981	11.8329
26	SWE	Sweden	0.240848	0.29334	0.31444	0.266579	0.249082	0.207397	0.300031	0.380828	0.409226	0.450582	0.510995	0.609834	0.360628	0.33195	0.424	0.474869	0.546097	0.624513	0.752251	0.797733	0.764975	0.874035	1.00044	1.0473	1.08899	1.21038	1.26857	1.31228	1.28402	1.25883	1.29175	1.45132	1.44403	1.55006	1.57174	1.69778	1.86604	1.94275	1.89948	1.9747	2.01323	2.03693	2.0958	1.97311	1.92953	2.18379	1.71916
27	CHE	Switzerland	0.321246	0.351841	0.402832	0.433427	0	0	0	0	0.259546	0.331444	0.331444	0.331444	0.331444	0.362549	0.223852	0.187139	0.219263	0.211615	0.353881	0.507258	0.509914	0.484419	0.549688	0.670521	0.705743	0.806191	0.926554	1.07953	1.21363	1.21155	1.11414	1.36809	1.54811	1.83624	1.89998	1.82597	2.20385	2.05957	2.20594	2.12941	2.20341	2.31195	2.44566	2.65187	2.89194	2.90372	2.64218
28	GBR	United Kingdom	2.31034	2.50252	2.68367	3.14311	2.26834	2.3471	2.77241	3.09796	3.51802	3.83307	4.14811	4.67319	3.78056	3.92388	3.96357	3.71853	2.49473	2.1639	3.50833	3.7132	4.54544	4.91683	5.20488	5.45473	5.94074	5.98596	6.38286	6.67902	6.81138	6.38286	6.22274	6.71583	7.08703	7.54859	7.48554	7.38264	8.90855	9.02667	8.79509	9.22933	9.38489	9.14802	8.95437	9.39133	9.46723	10.4802	9.32023
29	USA	USA	14.8155	14.4105	13.7285	10.3875	6.396	5.369	6.6305	6.4235	9.5615	9.9635	8.87862	10.3712	11.0979	13.9535	15.4576	11.5712	7.71817	8.75803	14.0812	15.9979	17.6984	18.0545	19.3392	21.9067	22.1356	23.3941	24.023	26.4978	28.2073	26.8315	27.6465	30.1188	28.7156	28.6192	29.8118	31.3562	32.9522	33.2308	34.488	33.5099	35.2358	35.4246	34.6606	35.2418	36.2479	36.6479	36.5458
30	MEX	Mexico	0.104036	0.108371	0	0	0.121208	0.121208	0.121208	0.121208	0.137741	0.166021	0.179998	0.197372	0.233596	0.25887	0.283439	0.278516	0.319238	0.356614	0.355458	0.340912	0.401428	0.591274	0.733457	0.777851	0.789927	0.802906	0.842912	0.970568	1.09675	1.23303	1.22292	1.30483	1.48785	1.4623	1.61452	1.812	2.12794	2.07307	2.36346	3.01423	2.95064	3.26905	3.45772	3.5159	4.07406	4.59639	4.934
31	BRA	Brazil	0.0423852	0.0462384	0.0419035	0.0804355	0.0717658	0.106926	0.156055	0.174839	0.232637	0.27524	0.29761	0.336092	0.358171	0.369669	0.363084	0.35999	0.390092	0.372979	0.398027	0.439999	0.535355	0.617016	0.665629	0.70129	0.779823	0.977715	1.20411	1.33464	1.5861	1.6261	1.82547	1.85004	2.15488	2.26808	2.44297	2.49686	2.7088	2.68621	2.91212	3.08495	3.50694	3.76801	3.92425	4.27345	4.96117	5.8407	6.5039
32	EGY	Egypt	0.0433485	0.086697	0.144495	0.115596	0.117041	0.138715	0.14305	0.182545	0.161353	0.158945	0.180986	0.179145	0.173795	0.202345	0.202765	0.155505	0.204172	0.208115	0.283006	0.312279	0.370044	0.38532	0.48165	0.544307	0.456163	0.52837	0.643048	0.660381	0.650688	0.706137	0.728727	0.855891	0.892036	1.02881	1.03555	1.20847	1.21422	1.16657	1.2663	1.3178	1.51578	1.74021	1.77407	1.88213	1.77112	1.72525	1.55196
33	TUR	Türkiye	0.0289066	0.0318463	0.0279267	0.0489943	0.0529138	0.0578132	0.0825553	0.0642682	0.0869678	0.105237	0.131093	0.138959	0.130637	0.133715	0.103307	0.0742126	0.139805	0.141326	0.158359	0.171703	0.168993	0.182545	0.189516	0.19403	0.224864	0.258706	0.346864	0.402265	0.475214	0.617854	0.743279	0.84957	0.998476	0.99363	1.13619	1.32186	1.44043	1.63054	1.89367	2.08177	2.31649	2.83975	3.12131	3.67571	4.07846	4.3055	4.89632
34	IRN	Iran	0	0	0	0	0	0	0	0	0.0264908	0.0264908	0.0264908	0.0818805	0.0264908	0.0264908	0.0264908	0.0168578	0.0183027	0.0120412	0.0205665	0.0205732	0.0312085	0.0281765	0.0308256	0.0312981	0.0336803	0.0312981	0.0299016	0.038527	0.0751646	0.0669499	0.197482	0.27889	0.383874	0.358819	0.358819	0.358819	0.358819	0.377959	0.671224	0.671471	0.934424	1.12804	1.2398	1.36971	1.3877	1.66954	1.86266
35	SAU	Saudi Arabia	0	0	0	0	0	0	0	0	0	0	0	0	0	0	0	0	0	0	0	0	0	0	0	0	0	0	0	0	0	0	1.31592	0	0	0.0506026	0.0731931	0.0943871	0.124782	0.121824	0.120428	0.170537	0.246113	0.268785	0.325021	0.338243	0.446057	0.463058	0.489601
36	IND	India	0.273577	0.27454	0.349146	0.28321	0.285137	0.300068	0.369426	0.429632	0.470572	0.550044	0.670457	0.790869	0.911282	1.03169	1.06926	1.03362	1.00039	1.05	0.948369	0.708507	0.760044	1.0288	1.27734	1.56633	1.73105	1.84954	2.13758	2.19591	2.41171	2.74064	2.98536	3.33358	3.77866	3.9713	4.13601	4.50592	4.66726	5.09501	5.32273	5.63226	5.75113	6.38688	6.52316	7.14223	7.52214	7.13218	6.75872
37	CHN	China	0.124407	0.182167	0.222951	0.235821	0.094786	0.133293	0.113052	0.100216	0.222155	0.394942	0.40679	0.661527	0.717066	0.587031	0.77606	0.759397	0.581497	0.209813	0.102713	0.300497	0.377663	0.601299	0.212281	0.639908	1.01038	1.91551	2.27091	2.22157	3.17041	3.36044	4.59125	6.05748	6.66472	4.9368	4.44315	4.9368	5.18367	5.48081	5.49369	4.02291	4.56911	5.06032	5.05079	5.94599	6.78624	11.7216	11.5153
38	KOR	South Korea	0	0	0	0	0	0	0	0	0	0	0	0	0	0.629027	0.569035	0.67431	0.483096	0.00257683	0.00515173	0.0087617	0.00835663	0.0116232	0.0048165	0.00336803	0.017333	0.021194	0.0299016	0.0269443	0.0221797	0.0442773	0.142607	0.172427	0.207586	0.251945	0.380506	0.374755	0.598195	0.777358	0.905508	1.1752	1.72049	2.34325	2.80375	3.30316	3.15654	3.91499	4.227
39	JPN	Japan	1.85198	2.06076	1.80714	1.74301	1.79894	2.30666	2.47108	2.83357	3.00493	3.23208	2.66105	2.44649	2.04918	2.81026	2.10031	1.81662	1.4441	0.565224	0.447928	0.595951	0.891034	1.57887	2.14947	3.15722	3.43156	4.22758	5.14713	5.0931	6.27974	7.31729	7.22527	8.32598	10.867	11.8786	13.8801	14.4399	15.9022	15.7614	18.45	20.7297	22.9884	24.7772	27.5687	28.6348	29.1694	37.5387	35.0943
40	VNM	Vietnam	0	0	0	0	0	0	0	0	0	0	0	0	0	0	0	0	0	0	0	0	0	0	0	0	0	0.140143	0.122317	0.144497	0.168566	0.168566	0.145483	0.183024	0.19551	0.218183	0.226398	0.236502	0.348715	0.455095	0.426262	0.446059	0.308052	0.357176	0.377881	0.365752	0.233917	0.364203	0.331953
41	IDN	Indonesia	0	0	0	0	0	0	0	0	0	0	0	0	0	0.144495	0	0	0	0	0	0.0048165	0.0181828	0	0	0.0484668	0.0659642	0.0717966	0.0708108	0.0717966	0.0506026	0.0722073	0.144004	0.165691	0.186392	0.214322	0.246113	0.158955	0.211447	0.175795	0.162816	0.144579	0.197482	0.260078	0.266482	0.263424	0.266482	0.35167	0.400161
42	ZAF	South Africa	0	0	0	0	0	0	0	0	0	0	0	0	0	0	0	0	0	0	0	0	0	0	0	0	0	1.02257	1.0413	1.12517	1.18965	1.21619	1.31107	1.27492	1.30285	1.25135	1.28076	1.38911	1.66414	1.86975	1.91888	1.83508	2.12408	2.40206	2.76923	2.811	2.92451	3.27394	3.47141
		ROW	1.24063	1.56678	1.934	2.15018	2.31191	1.94483	2.41179	2.98076	3.67534	4.052	3.80648	3.80505	3.95636	4.08274	4.06267	4.09463	4.09905	2.45778	3.46459	4.35173	5.23229	6.16796	7.93282	9.5965	11.5451	12.7042	15.0969	17.4906	18.9736	21.6031	24.6404	28.2195	31.9512	35.4398	38.6902	42.1474	45.2036	50.0924	54.9656	57.8978	61.4332	63.6699	68.3224	71.9116	77.2322	80.3258	83.258
		Total	34.5769	36.1262	34.4698	29.6361	23.545	23.1156	27.8424	30.2986	34.6306	38.2056	38.7091	41.6	39.1116	42.2497	40.0094	36.6004	26.2109	23.7849	35.2039	40.5903	48.4064	54.9252	62.4378	72.8082	78.4651	84.7416	91.8227	101.253	109.428	114.243	129.248	143.553	154.607	163.742	174.164	184.739	203.446	211.898	226.951	234.81	250.896	263.681	277.581	289.775	305.037	330.407	331.269
[truncated: 50 more columns]
