# Supplementary material for: Global and national CO 2 uptake by cement carbonation from 1928 to 2024
Source: Copernicus journal article supplement (doi:10.5194/essd-17-2231-2025), 2025-05-27
Supplement: Supplementary file 5 [file Table S4-Uncertainty of cement carbon uptakes.xlsx]

## Sheet: Summary
Table S4: Uncertainty of cement carbon uptakes
Index	Name	Time Span	Unit	Area
SI data 1	Uncertainty of CO2 emissions from cement production	1928-2024	million tons (Mt) CO2	global
SI data 2	Lower value (95 % CI) of global carbon uptake by 42 countries and ROW	1928-2024	million tons (Mt) CO2	42 countries and regions
SI data 3	Upper value (95 % CI) of global carbon uptake by 42 countries and ROW	1928-2024	million tons (Mt) CO2	42 countries and regions

## Sheet: SI data1
SI data 1. Uncertainty of cement carbon uptakes
unit: million tons (Mt) CO2
median value of cement carbon uptake by four materials
	1928	1929	1930	1931	1932	1933	1934	1935	1936	1937	1938	1939	1940	1941	1942	1943	1944	1945	1946	1947	1948	1949	1950	1951	1952	1953	1954	1955	1956	1957	1958	1959	1960	1961	1962	1963	1964	1965	1966	1967	1968	1969	1970	1971	1972	1973	1974	1975	1976
Concrete	1.43001	2.05601	2.45545	2.58608	2.53078	2.59425	2.87292	3.12553	3.53693	3.92244	4.19083	4.56246	4.7863	5.19476	5.45541	5.50115	5.2259	5.15934	5.64204	6.07954	6.63886	7.20437	7.86094	8.65524	9.46126	10.4264	11.482	12.6677	13.7707	14.6614	15.8763	17.3187	18.7203	20.1087	21.5318	22.9331	24.5442	25.9564	27.5767	29.0456	30.7926	32.4556	34.1154	35.8446	37.7279	40.1361	42.0807	43.5874	46.0318
Mortar	4.63895	5.46402	5.50475	4.93214	4.09715	3.94933	4.60176	5.03375	5.72121	6.3702	6.57192	7.09187	6.81745	7.18691	6.95516	6.497	5.17157	4.58797	6.0745	7.00659	8.25139	9.4617	10.8076	12.4428	13.7006	14.626	15.9618	17.6263	19.2233	20.4211	23.7065	26.3539	28.6881	30.5551	32.5288	34.7161	37.9138	39.925	42.8247	44.7601	47.7304	50.3967	53.0786	55.5081	58.9109	63.5359	64.9181	64.9652	70.4097
Loss	0.449709	0.510509	0.519689	0.475952	0.404278	0.394635	0.450823	0.483298	0.543655	0.597339	0.612353	0.657518	0.635564	0.682886	0.660636	0.615397	0.477223	0.430143	0.564958	0.638989	0.748717	0.849153	0.967171	1.11512	1.2146	1.32178	1.4374	1.58241	1.7182	1.80882	2.03033	2.24911	2.4321	2.58968	2.76288	2.93672	3.21222	3.36793	3.6048	3.75181	3.99927	4.21463	4.4406	4.6445	4.88668	5.26422	5.33814	5.29271	5.64621
CKD	1.22041	1.27363	1.21458	1.04139	0.826338	0.810092	0.975175	1.05963	1.21409	1.33854	1.35207	1.45397	1.37095	1.49161	1.41608	1.29081	0.92642	0.840165	1.24378	1.43447	1.70645	1.93371	2.19993	2.53919	2.73554	2.95869	3.20723	3.53537	3.83118	4.00198	4.53753	5.03925	5.42846	5.7479	6.11586	6.4865	7.13407	7.43184	7.96431	8.24147	8.807	9.27037	9.76135	10.189	10.7238	11.6188	11.6519	11.4132	12.3189
Total	7.73907	9.30416	9.69447	9.03556	7.85854	7.74831	8.90068	9.7022	11.0159	12.2285	12.7272	13.7658	13.6103	14.5562	14.4873	13.9044	11.8011	11.0176	13.5253	15.1596	17.3454	19.4489	21.8356	24.7524	27.112	29.3329	32.0884	35.4118	38.5434	40.8933	46.1506	50.961	55.269	59.0013	62.9394	67.0725	72.8044	76.6812	81.9706	85.7989	91.3293	96.3373	101.396	106.186	112.249	120.555	123.989	125.259	134.407
Lower (95% CI)
	1928	1929	1930	1931	1932	1933	1934	1935	1936	1937	1938	1939	1940	1941	1942	1943	1944	1945	1946	1947	1948	1949	1950	1951	1952	1953	1954	1955	1956	1957	1958	1959	1960	1961	1962	1963	1964	1965	1966	1967	1968	1969	1970	1971	1972	1973	1974	1975	1976
Concrete	1.11267	1.59616	1.89848	2.10168	2.09987	2.16432	2.39432	2.6016	2.93888	3.26947	3.50192	3.82678	4.01661	4.37006	4.6039	4.6331	4.41095	4.36224	4.77398	5.13579	5.60367	6.06257	6.59988	7.27413	7.95808	8.76949	9.66434	10.6707	11.5973	12.3748	13.3995	14.6368	15.8226	16.9291	18.1558	19.3563	20.7004	21.9228	23.2377	24.4441	25.9288	27.3818	28.7109	30.1958	31.7634	33.723	35.3845	36.6262	38.7119
Mortar	3.55105	4.17097	4.19842	3.92574	3.33826	3.23326	3.77534	4.13699	4.63	5.289	5.46622	5.94063	5.72172	6.10972	5.96068	5.50345	4.41978	3.95518	5.21309	5.97973	6.97557	7.95374	9.07416	10.4475	11.5058	12.3184	13.5076	14.8678	16.2766	17.3138	20.1214	22.3376	24.2795	25.7303	27.3629	29.2224	31.8536	33.5576	36.0002	37.547	40.1598	42.5046	44.6593	46.7893	49.6754	53.7179	54.9383	55.1142	60.0182
Loss	0.336567	0.380981	0.387487	0.370706	0.322492	0.316342	0.362162	0.38852	0.431909	0.484198	0.496235	0.534672	0.516726	0.558048	0.541522	0.499458	0.391343	0.353009	0.462411	0.522975	0.612019	0.692671	0.787019	0.907888	0.988374	1.07757	1.17466	1.29233	1.40385	1.48155	1.66449	1.84513	1.99618	2.11431	2.25056	2.39179	2.61246	2.73772	2.92657	3.03253	3.23689	3.41735	3.58802	3.76492	3.96144	4.26728	4.33144	4.29178	4.61199
CKD	0.844062	0.878148	0.836632	0.751974	0.612242	0.603372	0.728012	0.792359	0.887406	1.01245	1.02177	1.10628	1.03992	1.13725	1.08157	0.979744	0.717425	0.650413	0.946827	1.09234	1.29541	1.46385	1.66881	1.93183	2.08164	2.2559	2.45186	2.69618	2.93057	3.06553	3.48609	3.87123	4.15338	4.36639	4.63405	4.91811	5.39244	5.61452	6.01067	6.18443	6.64422	7.004	7.34749	7.68633	8.10294	8.79673	8.81399	8.64131	9.42836
Total	5.84435	7.02627	7.32102	7.1501	6.37286	6.31729	7.25983	7.91947	8.8882	10.0551	10.4861	11.4084	11.295	12.1751	12.1877	11.6157	9.9395	9.32085	11.3963	12.7308	14.4867	16.1728	18.1299	20.5613	22.5339	24.4214	26.7984	29.527	32.2083	34.2357	38.6714	42.6907	46.2517	49.1401	52.4033	55.8886	60.559	63.8327	68.1752	71.2081	75.9697	80.3078	84.3057	88.4363	93.5032	100.505	103.468	104.673	112.77
Upper (95% CI)
	1928	1929	1930	1931	1932	1933	1934	1935	1936	1937	1938	1939	1940	1941	1942	1943	1944	1945	1946	1947	1948	1949	1950	1951	1952	1953	1954	1955	1956	1957	1958	1959	1960	1961	1962	1963	1964	1965	1966	1967	1968	1969	1970	1971	1972	1973	1974	1975	1976
Concrete	1.66971	2.43196	2.9024	3.03021	2.96095	3.0298	3.35251	3.63928	4.12677	4.57081	4.87421	5.29411	5.53558	6.04205	6.33962	6.4113	6.14706	6.11084	6.69045	7.22999	7.96217	8.69732	9.56381	10.4555	11.4409	12.5568	13.7583	15.0819	16.3616	17.3715	18.7321	20.3284	21.9314	23.5578	25.2408	26.8254	28.718	30.3888	32.2531	33.9419	36.0126	37.9523	39.9775	42.0917	44.4371	47.2677	49.5348	51.5157	54.6869
Mortar	5.95374	6.9982	7.08326	5.99388	4.89937	4.69354	5.49344	5.98143	6.94615	7.53809	7.73869	8.31501	7.98801	8.33625	8.05726	7.55979	6.00225	5.30146	6.97761	8.05465	9.48504	10.8613	12.3263	14.293	15.7051	16.7628	18.29	20.3048	22.1034	23.4031	27.2505	30.392	33.1757	35.4308	37.7948	40.2382	44.0497	46.2664	49.6938	51.9693	55.0496	57.9858	61.046	63.9732	67.4888	72.5737	74.1952	74.034	79.7805
Loss	0.580749	0.666079	0.678152	0.611698	0.5199	0.507098	0.576422	0.617171	0.704204	0.752957	0.776037	0.825958	0.796989	0.847062	0.811456	0.759657	0.583824	0.519968	0.687134	0.7798	0.916292	1.04011	1.17879	1.36939	1.48886	1.61719	1.76122	1.94977	2.11223	2.22801	2.51051	2.78681	3.02867	3.24624	3.46725	3.67892	4.0286	4.218	4.52314	4.72423	5.00078	5.25384	5.54869	5.81087	6.07901	6.52929	6.62858	6.57054	6.95145
CKD	1.64671	1.74683	1.67607	1.42615	1.14136	1.1239	1.35452	1.46907	1.72044	1.81525	1.85632	1.97751	1.86245	1.98707	1.87503	1.73653	1.21356	1.08747	1.63317	1.88837	2.26221	2.56104	2.89727	3.38244	3.64147	3.92555	4.25323	4.72296	5.09451	5.3443	6.07362	6.77583	7.33179	7.81947	8.32423	8.80995	9.72845	10.1238	10.8707	11.2989	11.9917	12.5766	13.335	13.9207	14.5142	15.6411	15.7397	15.4622	16.5072
Total	9.8509	11.8431	12.3399	11.0619	9.52159	9.35433	10.7769	11.707	13.4976	14.6771	15.2453	16.4126	16.183	17.2124	17.0834	16.4673	13.9467	13.0197	15.9884	17.9528	20.6257	23.1598	25.9661	29.5003	32.2763	34.8624	38.0628	42.0594	45.6717	48.3469	54.5667	60.2831	65.4675	70.0544	74.8271	79.5524	86.5247	90.997	97.3408	101.934	108.055	113.769	119.907	125.796	132.519	142.012	146.098	147.582	157.926
[truncated: 48 more columns]

## Sheet: SI data2
SI data 2. Lower value (95 % CI) of global carbon uptake by 42 countries and ROW, 1928-2024
unit: million tons (Mt) CO2
code	ISO	Countries	1928	1929	1930	1931	1932	1933	1934	1935	1936	1937	1938	1939	1940	1941	1942	1943	1944	1945	1946	1947	1948	1949	1950	1951	1952	1953	1954	1955	1956	1957	1958	1959	1960	1961	1962	1963	1964	1965	1966	1967	1968	1969	1970	1971	1972	1973	1974
1	AUS	Australia	0.0676609	0.0803636	0.0874646	0.0604105	0.0437861	0.0493842	0.0594202	0.0758622	0.0892564	0.100448	0.118169	0.124983	0.128446	0.0808887	0.0701657	0.0691244	0.0646623	0.103905	0.111887	0.131736	0.149978	0.156941	0.174176	0.185513	0.202675	0.232805	0.273108	0.291619	0.314557	0.341665	0.364743	0.389694	0.417842	0.435275	0.451202	0.4812	0.546145	0.583064	0.58664	0.611808	0.63582	0.689125	0.727661	0.753012	0.784712	0.821503	0.910862
2	AUT	Austria	0.0373894	0.0512945	0.058879	0.0541601	0.0428727	0.0364953	0.0388986	0.044006	0.0449973	0.0505163	0.0708351	0.07888	0.0861302	0.0968915	0.0864849	0.0943647	0.0696533	0.0629593	0.0604055	0.051069	0.086168	0.121581	0.144334	0.167126	0.167846	0.17089	0.193246	0.219117	0.232689	0.254389	0.263353	0.290812	0.333612	0.366333	0.374296	0.403852	0.452098	0.48896	0.541355	0.560932	0.573186	0.584403	0.614469	0.683445	0.773982	0.790566	0.821343
3	BEL	Belgium	0.153768	0.203257	0.216024	0.22881	0.182035	0.172776	0.171129	0.190334	0.203989	0.247596	0.261363	0.239565	0.241895	0.131855	0.111197	0.101084	0.105231	0.105832	0.176987	0.228811	0.282136	0.271661	0.314586	0.375157	0.373921	0.412358	0.409737	0.436134	0.444573	0.454183	0.423282	0.447012	0.45137	0.478963	0.489274	0.491982	0.565049	0.584711	0.590915	0.601072	0.604386	0.64336	0.682093	0.703517	0.721949	0.72641	0.756399
4	BGR	Bulgaria	0.00934146	0.0156729	0.0198681	0.0142526	0.0174854	0.0163085	0.0174038	0.017159	0.017177	0.0186797	0.0237024	0.0246775	0.0252923	0.0203417	0.0199217	0.0198788	0.0200262	0.0321288	0.0342124	0.0402122	0.0440806	0.0578936	0.0706664	0.0823345	0.0894464	0.0947463	0.105052	0.111386	0.11874	0.123317	0.130998	0.183941	0.208664	0.232886	0.254293	0.293326	0.346287	0.364204	0.391609	0.452064	0.482218	0.498149	0.519321	0.545299	0.554985	0.584519	0.601753
5	CAN	Canada	0.149969	0.203103	0.217581	0.203138	0.119052	0.0758989	0.0859147	0.0855954	0.108132	0.130166	0.125201	0.129932	0.160984	0.179884	0.19649	0.172118	0.170347	0.19078	0.242016	0.256948	0.297059	0.334193	0.35606	0.370015	0.400977	0.468178	0.485826	0.539341	0.608733	0.717281	0.749857	0.777628	0.747858	0.79231	0.852722	0.897667	0.998383	1.06844	1.15627	1.08507	1.11835	1.14482	1.13444	1.25005	1.36734	1.50343	1.57442
6	HRV	Croatia	0	0	0	0	0	0	0	0	0	0	0	0	0	0	0	0	0	0	0	0	0	0	0	0	0	0	0	0	0	0	0	0	0	0	0	0	0	0	0	0	0	0	0	0	0	0	0
7	CYP	Cyprus	0	0	0	0	0	0	0	0	0	0	0	0	0	0	0	0	0	0	0	0	0	0	0	0	0	0	0	0	0	0	0.00836088	0.00952631	0.0105898	0.0115486	0.0121302	0.0125782	0.0102321	0.0129625	0.0135187	0.022721	0.0293493	0.0314118	0.0347156	0.0395545	0.0530669	0.058556	0.0491329
8	CZE	Czechia	0	0	0	0	0.0836317	0.0787408	0.0878952	0.097732	0.107621	0.136097	0.14402	0.149431	0.154093	0.0748997	0.0670216	0.0658012	0.0644884	0.086877	0.110388	0.152949	0.180759	0.196127	0.214076	0.237648	0.256205	0.272595	0.299281	0.334858	0.366283	0.418311	0.467617	0.530208	0.578091	0.620921	0.678128	0.6475	0.681077	0.713297	0.762619	0.786837	0.833323	0.883964	0.935486	0.983498	0.995816	1.02026	1.06109
9	DNK	Denmark	0.0734954	0.0929539	0.0999687	0.0752026	0.0636045	0.0777929	0.103702	0.106778	0.113061	0.102715	0.0993641	0.10602	0.0796289	0.0751105	0.0755624	0.0979953	0.102342	0.056522	0.0820001	0.0987539	0.116372	0.127014	0.134428	0.149527	0.178177	0.189092	0.189094	0.195889	0.190709	0.189306	0.179747	0.215105	0.22668	0.246622	0.255999	0.248558	0.291766	0.310447	0.328381	0.345502	0.359715	0.40196	0.41068	0.426966	0.431506	0.447192	0.407434
10	FIN	Finland	0.0196944	0.0243078	0.0208216	0.0180035	0.0173289	0.0181932	0.024896	0.029565	0.0347347	0.0424324	0.0497653	0.0590141	0.06149	0.0421525	0.0298608	0.0329532	0.0282735	0.0355534	0.040436	0.0486407	0.0614968	0.0722547	0.082153	0.0921203	0.0909438	0.105439	0.117183	0.122091	0.116868	0.116579	0.115972	0.137056	0.148003	0.158961	0.163572	0.172511	0.187658	0.208428	0.196672	0.194515	0.192806	0.217755	0.232138	0.231492	0.248844	0.26253	0.276623
11	FRA	France	0.261217	0.430722	0.431901	0.455392	0.486312	0.472248	0.479205	0.439882	0.164908	0.135345	0.123153	0.117262	0.109681	0.33179	0.295078	0.330742	0.237319	0.231026	0.360037	0.41348	0.537655	0.640526	0.72454	0.819555	0.888189	0.963975	1.02492	1.11771	1.19059	1.31267	1.41807	1.49935	1.55144	1.68454	1.80916	1.96139	2.25954	2.39914	2.53637	2.69233	2.8133	3.03313	3.2141	3.27544	3.42619	3.51542	3.69373
12	DEU	Germany	0.491571	0.577051	0.526039	0.411224	0.344153	0.416928	0.632475	0.834823	1.08855	1.23142	1.47233	1.54201	1.46831	1.34312	1.03504	1.13738	0.659244	0.589556	0.557217	0.575408	0.763455	1.00386	1.23054	1.509	1.65486	1.95433	2.11387	2.39794	2.57505	2.63043	2.69824	3.06124	3.35231	3.64228	3.85941	4.01011	4.45557	4.64958	4.8371	4.74599	4.97484	5.18105	5.56355	5.88911	6.14653	6.1494	5.86886
13	GRC	Greece	0.0106328	0.0141917	0.0179779	0.0206155	0.0217188	0.0228723	0.0277279	0.0311163	0.0326992	0.0348112	0.0375374	0.0386959	0.0396763	0.0195046	0.0141041	0.0100354	0.00885727	0.0127992	0.0169967	0.0243234	0.0346338	0.0399991	0.0508558	0.0536765	0.0694395	0.0858125	0.0994349	0.127568	0.143809	0.148514	0.162565	0.176647	0.198912	0.223323	0.232357	0.276461	0.320064	0.379649	0.429246	0.434054	0.498469	0.582394	0.606355	0.680052	0.740709	0.803247	0.870439
14	HUN	Hungary	0.0369242	0.043706	0.0406606	0.038631	0.0291745	0.0268399	0.0310691	0.0372737	0.0319933	0.0496471	0.0528827	0.0544668	0.0556903	0.0847685	0.095309	0.0958242	0.0422479	0.0243662	0.0331006	0.0376194	0.0314892	0.0804922	0.103284	0.123743	0.142361	0.145514	0.139078	0.161965	0.14849	0.148202	0.181	0.200013	0.219608	0.228753	0.245566	0.258319	0.30991	0.333482	0.36464	0.379442	0.401345	0.3856	0.409518	0.408082	0.435974	0.485243	0.49761
15	IRL	Ireland	0	0	0	0	0	0	0	0	0	0	0.0104045	0.0262159	0.0300803	0.0339263	0.0265429	0.0310631	0.0293049	0.0265893	0.036586	0.0373729	0.0482553	0.055571	0.0568425	0.0565381	0.0606728	0.0629837	0.076044	0.0857982	0.0927571	0.0769753	0.0761146	0.0771756	0.0818403	0.102574	0.118636	0.112867	0.130444	0.141871	0.151586	0.172677	0.182858	0.179745	0.142524	0.200871	0.209093	0.221213	0.235568
16	ITA	Italy	0.296336	0.410802	0.45226	0.429101	0.440091	0.495779	0.570224	0.599121	0.574678	0.635299	0.680088	0.71636	0.504417	0.485431	0.417431	0.347723	0.296878	0.262697	0.351481	0.44698	0.501086	0.613486	0.743177	0.834956	0.980005	0.264259	0.182641	0.153196	0.137652	0.127254	1.55972	1.92448	2.21275	2.5285	2.8491	3.15862	3.33265	3.16653	3.38456	3.88323	4.34518	4.69244	4.97496	4.90154	5.1171	5.48229	5.55484
17	LUX	Luxembourg	0	0	0	0	0	0	0	0	0	0	0	0	0	0	0	0	0	0.00506912	0.00825677	0.010355	0.012204	0.0146686	0.015731	0.0169542	0.0145911	0.0189351	0.0200781	0.0212377	0.0223253	0.0227513	0.0264299	0.0268151	0.0291286	0.0319581	0.032605	0.0304581	0.0307775	0.0328291	0.0324133	0.0297412	0.0304355	0.0323148	0.0366065	0.0392132	0.044852	0.0509926	0.0559182
18	NLD	Netherlands	0	0	0	0	0.0224113	0.035	0.0410119	0.04018	0.0449499	0.0500502	0.0533214	0.0624766	0.0648828	0.0595025	0.0515229	0.04988	0.0371055	0.0369353	0.0516451	0.064054	0.0727183	0.0718466	0.0767129	0.0881968	0.100849	0.1083	0.110539	0.134787	0.153611	0.164194	0.172475	0.197153	0.22118	0.237664	0.253391	0.265724	0.342274	0.366303	0.394434	0.421399	0.439229	0.436119	0.489772	0.507459	0.501743	0.497785	0.489303
19	NOR	Norway	0.0108238	0.0136695	0.0155711	0.0128546	0.0137034	0.0136571	0.0151014	0.0161756	0.0177956	0.0196468	0.0209292	0.0239922	0.0186489	0.0218471	0.0248161	0.0231393	0.0239451	0.0171198	0.027968	0.0308725	0.0341797	0.0380969	0.0392611	0.0451987	0.0471741	0.0505711	0.0527754	0.0555225	0.0616577	0.0665049	0.0702697	0.0762904	0.079624	0.0850079	0.0946134	0.0990251	0.106017	0.111775	0.124067	0.137766	0.151828	0.165245	0.175682	0.185472	0.188017	0.195279	0.196212
20	POL	Poland	0.101743	0.117022	0.109187	0.0818309	0.0593509	0.0628565	0.096441	0.114407	0.140796	0.1724	0.22679	0.237936	0.199268	0.0897792	0.0760509	0.0709921	0.0686685	0.0668929	0.183785	0.21244	0.253361	0.30361	0.334498	0.37858	0.387388	0.463061	0.49049	0.546919	0.5857	0.646962	0.724501	0.771934	0.927931	1.04462	1.09327	1.13213	1.27039	1.39268	1.48057	1.63084	1.71969	1.78052	1.84787	1.94944	2.05508	2.22499	2.36463
21	PRT	Portugal	0.00878845	0.0123508	0.0150309	0.0153005	0.0190654	0.0255286	0.0295485	0.0344032	0.039671	0.0420699	0.0450346	0.0498963	0.0476305	0.0481672	0.044627	0.0448768	0.0450053	0.0475098	0.0562854	0.0713757	0.0832917	0.08895	0.0977329	0.109363	0.123512	0.132188	0.138748	0.138591	0.172998	0.168393	0.179648	0.183354	0.208185	0.219502	0.243937	0.25354	0.28285	0.297063	0.307753	0.327488	0.335773	0.363688	0.409992	0.436077	0.489987	0.569985	0.584982
22	ROU	Romania	0.0286848	0.0342429	0.0453364	0.0285327	0.0290521	0.0299844	0.0398771	0.0463081	0.0495161	0.0588902	0.0605239	0.0702651	0.0594322	0.0817104	0.0790446	0.108352	0.0691006	0.050373	0.0537981	0.0644103	0.0688076	0.0808357	0.0922908	0.144419	0.189453	0.238974	0.229176	0.264468	0.292677	0.324403	0.348738	0.385481	0.416999	0.453722	0.482571	0.58298	0.642707	0.728204	0.800791	0.868899	0.960503	1.03718	1.12466	1.17854	1.25796	1.3319	1.47203
23	SVK	Slovakia	0	0	0	0	0	0	0	0	0	0	0	0	0	0	0	0	0	0	0	0	0	0	0	0	0	0	0	0	0	0	0	0	0	0	0	0	0	0	0	0	0	0	0	0	0	0	0
24	SVN	Slovenia	0	0	0	0	0	0	0	0	0	0	0	0	0	0	0	0	0	0	0	0	0	0	0	0	0	0	0	0	0	0	0	0	0	0	0	0	0	0	0	0	0	0	0	0	0	0	0
25	ESP	Spain	0.135099	0.193836	0.216782	0.2069	0.189457	0.18869	0.186484	0.187403	0.112683	0.109327	0.101938	0.16211	0.207479	0.225286	0.231395	0.240769	0.260177	0.272904	0.298151	0.308819	0.328217	0.325757	0.357236	0.387485	0.41828	0.45673	0.523769	0.592419	0.616537	0.677232	0.736487	0.799179	0.820468	0.919244	0.921089	1.06796	1.17452	1.27834	1.57642	1.76595	2.00689	2.15272	2.29825	2.37521	2.66777	3.03362	3.25071
26	SWE	Sweden	0.0315344	0.0470639	0.0561814	0.0529575	0.0516655	0.0464679	0.0608209	0.0758211	0.0838724	0.0933317	0.106405	0.125729	0.0930948	0.0870544	0.100523	0.110594	0.124816	0.140186	0.163218	0.176281	0.176505	0.19655	0.22176	0.236561	0.249617	0.274212	0.29108	0.305625	0.308439	0.309317	0.318479	0.347826	0.355457	0.378407	0.389056	0.415767	0.450637	0.473943	0.478491	0.497447	0.51178	0.524234	0.541203	0.530756	0.529286	0.57303	0.512667
27	CHE	Switzerland	0.0598659	0.0804752	0.0996979	0.112353	0.0232852	0.0133179	0.00986669	0.00814487	0.0631871	0.0857504	0.0913137	0.0943349	0.0966171	0.105467	0.0773286	0.0667392	0.072464	0.0711046	0.101626	0.139335	0.14658	0.14483	0.161085	0.191438	0.205534	0.232174	0.264909	0.306516	0.345532	0.354697	0.339923	0.397454	0.44814	0.52391	0.553571	0.55053	0.640032	0.627447	0.667888	0.662941	0.685374	0.71872	0.75878	0.816169	0.885254	0.906345	0.862537
28	GBR	United Kingdom	0.307721	0.41358	0.489602	0.593132	0.489474	0.504186	0.580877	0.650909	0.738461	0.813674	0.893621	1.00511	0.902324	0.932823	0.95183	0.926818	0.746432	0.67402	0.865946	0.924431	1.07217	1.16366	1.24098	1.312	1.41825	1.45983	1.54994	1.63178	1.68664	1.64776	1.63784	1.72875	1.81688	1.92317	1.94653	1.96039	2.2214	2.30018	2.31145	2.40947	2.47148	2.47289	2.46887	2.55887	2.60762	2.7978	2.66931
29	USA	USA	2.24524	2.81299	3.06342	2.69802	2.05159	1.82619	2.02486	2.02949	2.61126	2.81042	2.73434	3.05265	3.2889	3.91239	4.34644	3.82396	3.16544	3.26616	4.19809	4.7193	5.19359	5.44382	5.83358	6.3429	6.58799	6.97069	7.2636	7.86943	8.40844	8.39868	8.67559	9.2673	9.26755	9.41423	9.74506	10.1995	10.6777	10.9582	11.3956	11.4449	11.8913	12.1736	12.233	12.4815	12.8374	13.0955	13.2629
30	MEX	Mexico	0.0231396	0.0296036	0.00504176	0.00242507	0.0326784	0.0364448	0.0380554	0.0389997	0.0439938	0.0524317	0.0580173	0.0641224	0.0752743	0.0844381	0.0929202	0.0937317	0.105982	0.117839	0.119567	0.11749	0.133899	0.186012	0.231284	0.252225	0.262151	0.270179	0.284714	0.322964	0.36369	0.407553	0.414857	0.441937	0.497681	0.503525	0.548586	0.611636	0.708246	0.714372	0.801395	0.989887	1.00694	1.10804	1.18204	1.22003	1.38608	1.55736	1.68634
31	BRA	Brazil	0.00932596	0.0123956	0.0124938	0.0226801	0.0219634	0.0313332	0.0454279	0.0525946	0.0691881	0.0830381	0.0921673	0.104676	0.113444	0.119314	0.119433	0.119706	0.128944	0.126086	0.132432	0.144836	0.171633	0.19724	0.215133	0.229249	0.253742	0.309804	0.377843	0.424714	0.500718	0.525191	0.585755	0.605272	0.69344	0.740565	0.797928	0.827813	0.894332	0.905366	0.97519	1.03561	1.16006	1.2534	1.31715	1.42734	1.63274	1.90026	2.12502
32	EGY	Egypt	0.006025	0.0140659	0.0252172	0.0230838	0.0239517	0.0281314	0.0299841	0.0372305	0.0354537	0.0356686	0.0400094	0.0408785	0.0408762	0.0462629	0.0474816	0.0406017	0.0483671	0.0501044	0.0627856	0.069931	0.0813642	0.0867024	0.10467	0.118984	0.108921	0.12148	0.143169	0.151103	0.153285	0.164739	0.171986	0.195918	0.207744	0.235116	0.242745	0.276209	0.285432	0.283924	0.304626	0.319227	0.357357	0.40376	0.421168	0.447826	0.440106	0.438005	0.414476
33	TUR	Türkiye	0.00684626	0.00917572	0.00899368	0.0150084	0.0169599	0.0188707	0.0262081	0.0223831	0.02859	0.0345694	0.0430245	0.0468172	0.0457151	0.0471504	0.0391584	0.0303909	0.0476844	0.0499535	0.05519	0.0599973	0.0603349	0.0646835	0.0676733	0.069936	0.0793201	0.0903276	0.116852	0.136675	0.161012	0.204998	0.247157	0.284751	0.334549	0.343762	0.3881	0.449172	0.4942	0.558538	0.646377	0.716059	0.797393	0.961967	1.06991	1.24983	1.39883	1.49677	1.69106
34	IRN	Iran	0	0	0	0	0	0	0	0	0.00624286	0.0071036	0.00754063	0.0209735	0.00986201	0.00909999	0.00895472	0.00666141	0.00676896	0.00523041	0.00701307	0.00721632	0.00981659	0.00952239	0.0102878	0.0106282	0.0113732	0.0110231	0.0107797	0.0129026	0.0219729	0.0214021	0.0527733	0.0766813	0.106653	0.10716	0.109893	0.112485	0.11465	0.121238	0.193772	0.20538	0.274136	0.333773	0.374636	0.418243	0.436171	0.513564	0.577388
35	SAU	Saudi Arabia	0	0	0	0	0	0	0	0	0	0	0	0	0	0	0	0	0	0	0	0	0	0	0	0	0	0	0	0	0	0	0.30694	0.0422009	0.0189538	0.0241981	0.0281444	0.0329612	0.0405443	0.0410713	0.041334	0.053485	0.0731663	0.082063	0.0978975	0.104521	0.132613	0.142054	0.152107
36	IND	India	0.0546736	0.0681535	0.0918516	0.0830003	0.0845045	0.0895835	0.107796	0.125577	0.139544	0.162171	0.196551	0.232583	0.269962	0.308745	0.327155	0.326278	0.324467	0.33852	0.31804	0.263321	0.269789	0.333161	0.401288	0.482828	0.539091	0.582366	0.664148	0.698569	0.76409	0.857944	0.937964	1.04242	1.17548	1.25591	1.32096	1.43695	1.50942	1.64212	1.7376	1.84663	1.91211	2.09769	2.18013	2.36681	2.5145	2.47883	2.42413
37	CHN	China	0.0222966	0.038991	0.0521497	0.0585556	0.0317023	0.037278	0.0337859	0.0310325	0.0562367	0.0958643	0.1057	0.163284	0.18569	0.166408	0.207207	0.211352	0.179148	0.0993768	0.0670161	0.102155	0.12166	0.172173	0.100286	0.183675	0.272708	0.478515	0.589334	0.610165	0.827318	0.908579	1.19707	1.56225	1.77091	1.47826	1.36928	1.47686	1.55786	1.65362	1.69538	1.41638	1.51662	1.64623	1.68148	1.90077	2.13608	3.243	3.3961
38	KOR	South Korea	0	0	0	0	0	0	0	0	0	0	0	0	0	0.0875723	0.0923264	0.112842	0.0934957	0.0276124	0.0197779	0.0168721	0.0148754	0.0140112	0.0122196	0.0112327	0.0125422	0.0128667	0.0186643	0.0249915	0.0347446	0.0505121	0.0790129	0.101168	0.125913	0.150959	0.181723	0.186661	0.209492	0.218491	0.218866	0.241282	0.312718	0.41171	0.499346	0.597133	0.610275	0.739061	0.821266
39	JPN	Japan	0.220828	0.304921	0.309055	0.317834	0.336448	0.417984	0.462393	0.531171	0.577834	0.630326	0.576052	0.552979	0.503282	0.610318	0.529098	0.486789	0.433153	0.301946	0.262929	0.270207	0.30563	0.402955	0.497378	0.658594	0.804838	1.08426	1.43266	1.64399	1.9182	2.13037	2.20881	2.47776	2.99081	3.33014	3.74869	3.94926	4.19525	4.22874	4.64025	5.04967	5.45688	5.74928	6.14654	6.34426	6.50798	7.84663	7.92505
40	VNM	Vietnam	0	0	0	0	0	0	0	0	0	0	0	0	0	0	0	0	0	0	0	0	0	0	0	0	0	0.0340854	0.0345184	0.0415535	0.0493552	0.0513663	0.0470999	0.0565468	0.0615475	0.0688223	0.0726852	0.0769069	0.105951	0.137177	0.136921	0.144658	0.113993	0.123946	0.130768	0.129858	0.0988857	0.127661	0.123484
41	IDN	Indonesia	0	0	0	0	0	0	0	0	0	0	0	0	0	0.0349215	0.00470052	0.00207031	0.00134556	0.00102517	0.000839505	0.00187933	0.00514764	0.00125246	0.00086305	0.0130699	0.0189575	0.021766	0.0226884	0.0235389	0.0191271	0.0242859	0.0425213	0.0505021	0.0578577	0.0669373	0.0771361	0.0592158	0.0710831	0.0649241	0.0624301	0.0584724	0.0721214	0.090401	0.0967027	0.0998946	0.104587	0.12866	0.147028
42	ZAF	South Africa	0	0	0	0	0	0	0	0	0	0	0	0	0	0	0	0	0	0	0	0	0	0	0	0	0	0.168753	0.196441	0.223787	0.245832	0.259832	0.283802	0.287092	0.298682	0.297446	0.306642	0.330651	0.384112	0.431545	0.454653	0.452265	0.507405	0.568371	0.646703	0.675073	0.71128	0.786135	0.841623
		ROW	0.256679	0.360436	0.461246	0.554228	0.626528	0.573149	0.68265	0.83568	1.00775	1.16639	1.14247	1.17253	1.23081	1.3028	1.32714	1.34223	1.37631	1.01007	1.21593	1.42674	1.67137	1.9356	2.41414	2.88844	3.44287	3.83046	4.50157	5.20189	5.76181	6.5548	7.50342	8.55525	9.64562	10.6959	11.7421	12.8544	13.8613	15.3521	16.8558	17.9221	19.1873	20.1981	21.5711	22.8148	24.5478	25.7586	26.8993
[truncated: 50 more columns]

## Sheet: SI data3
SI data 3. Upper value (95 % CI) of global carbon uptake by 42 countries and ROW, 1928-2024
unit: million tons (Mt) CO2
code	ISO	Countries	1928	1929	1930	1931	1932	1933	1934	1935	1936	1937	1938	1939	1940	1941	1942	1943	1944	1945	1946	1947	1948	1949	1950	1951	1952	1953	1954	1955	1956	1957	1958	1959	1960	1961	1962	1963	1964	1965	1966	1967	1968	1969	1970	1971	1972	1973	1974
1	AUS	Australia	0.138369	0.143866	0.147328	0.0998348	0.0724931	0.0814723	0.0974282	0.124389	0.146084	0.163899	0.190938	0.201325	0.206233	0.129246	0.112779	0.111436	0.103525	0.167272	0.182031	0.214491	0.244381	0.255749	0.283293	0.3009	0.328352	0.377725	0.441891	0.470694	0.507424	0.553054	0.591087	0.631721	0.675643	0.701966	0.72979	0.775959	0.880144	0.93762	0.940543	0.980429	1.01995	1.10394	1.16561	1.20633	1.25221	1.30919	1.45057
2	AUT	Austria	0.0764626	0.0918269	0.0991776	0.0895053	0.0709808	0.0602085	0.0637801	0.0721552	0.0736463	0.0824262	0.114456	0.127061	0.138291	0.154816	0.139009	0.152126	0.111515	0.101356	0.0982746	0.0831499	0.140406	0.198126	0.234755	0.271077	0.271926	0.277268	0.312674	0.353671	0.37536	0.41178	0.426779	0.471427	0.539444	0.590784	0.605398	0.651231	0.728582	0.786292	0.867938	0.8989	0.919476	0.936185	0.984293	1.09488	1.23508	1.25989	1.30801
3	BEL	Belgium	0.314461	0.363868	0.363877	0.378133	0.301381	0.285039	0.280592	0.312084	0.333865	0.403996	0.422311	0.385896	0.388388	0.210681	0.178729	0.162958	0.168476	0.170375	0.287943	0.372546	0.459725	0.442694	0.511667	0.6085	0.605786	0.669048	0.662958	0.703951	0.717158	0.735187	0.685954	0.724638	0.729858	0.772423	0.791368	0.793345	0.91061	0.940268	0.947396	0.963225	0.969526	1.03063	1.09262	1.12704	1.15205	1.15765	1.20458
4	BGR	Bulgaria	0.0191036	0.0280574	0.0334664	0.023554	0.0289492	0.0269052	0.0285362	0.0281351	0.0281133	0.0304791	0.0382984	0.039751	0.0406094	0.0325025	0.0320207	0.0320467	0.032062	0.0517229	0.0556607	0.0654729	0.0718271	0.0943425	0.114937	0.133546	0.144911	0.153725	0.169975	0.179785	0.191544	0.199614	0.21229	0.298181	0.337405	0.375575	0.411302	0.473003	0.558062	0.585673	0.627855	0.724438	0.773549	0.79801	0.831879	0.873574	0.885619	0.931522	0.958306
5	CAN	Canada	0.306691	0.363593	0.3665	0.335708	0.197104	0.125215	0.14087	0.140348	0.176978	0.212389	0.202301	0.209297	0.258478	0.287422	0.315823	0.277471	0.272726	0.30713	0.393739	0.41836	0.484043	0.544596	0.579124	0.600161	0.649619	0.759616	0.78607	0.870535	0.98197	1.16106	1.21519	1.26059	1.20927	1.27776	1.37922	1.44753	1.60895	1.71814	1.85381	1.73884	1.794	1.83395	1.81722	2.00259	2.18193	2.39596	2.5073
6	HRV	Croatia	0	0	0	0	0	0	0	0	0	0	0	0	0	0	0	0	0	0	0	0	0	0	0	0	0	0	0	0	0	0	0	0	0	0	0	0	0	0	0	0	0	0	0	0	0	0	0
7	CYP	Cyprus	0	0	0	0	0	0	0	0	0	0	0	0	0	0	0	0	0	0	0	0	0	0	0	0	0	0	0	0	0	0	0.0135493	0.0154428	0.0171235	0.0186244	0.0196198	0.0202829	0.0164896	0.0208449	0.0216742	0.0364106	0.0470806	0.0503201	0.0556095	0.0633666	0.0846817	0.093318	0.0782455
8	CZE	Czechia	0	0	0	0	0.138462	0.129904	0.144117	0.160248	0.176142	0.222066	0.232708	0.240706	0.247413	0.119677	0.107726	0.106078	0.103246	0.13986	0.179591	0.24903	0.294538	0.319606	0.34819	0.385463	0.415076	0.442283	0.484239	0.540484	0.590865	0.677121	0.757801	0.859506	0.934762	1.00136	1.09683	1.04413	1.09759	1.14705	1.22268	1.26091	1.33677	1.41607	1.49852	1.57557	1.58908	1.62594	1.68982
9	DNK	Denmark	0.150301	0.166405	0.16839	0.12428	0.105305	0.12834	0.170034	0.17508	0.185045	0.167598	0.160553	0.170779	0.127853	0.120013	0.121453	0.157979	0.163849	0.0909927	0.133407	0.16079	0.189623	0.206981	0.218644	0.242531	0.288663	0.306801	0.305955	0.316179	0.30764	0.306431	0.291291	0.3487	0.366537	0.397726	0.414061	0.400811	0.470198	0.499227	0.526483	0.553671	0.577037	0.64392	0.657851	0.684004	0.688577	0.712671	0.648848
10	FIN	Finland	0.0402758	0.0435155	0.0350726	0.0297527	0.02869	0.0300144	0.0408206	0.0484767	0.0568496	0.0692359	0.080411	0.095061	0.0987287	0.0673522	0.047996	0.053124	0.0452659	0.0572361	0.0657858	0.079196	0.100206	0.117745	0.13362	0.149418	0.147337	0.171074	0.189602	0.197064	0.188524	0.188707	0.187939	0.222178	0.239318	0.256356	0.264567	0.278182	0.302422	0.335171	0.315318	0.311712	0.30929	0.348832	0.371853	0.370852	0.397093	0.418382	0.44053
11	FRA	France	0.534198	0.771074	0.727508	0.752585	0.805147	0.779098	0.785728	0.721259	0.269902	0.220838	0.198991	0.188888	0.176105	0.530142	0.474286	0.533189	0.379948	0.37192	0.585749	0.673223	0.876082	1.04379	1.17845	1.32931	1.43895	1.56404	1.65832	1.80407	1.92058	2.12483	2.29807	2.43056	2.50865	2.71665	2.9262	3.16283	3.64139	3.85804	4.06648	4.31449	4.51295	4.85892	5.14853	5.24728	5.46736	5.60238	5.88236
12	DEU	Germany	1.00528	1.03303	0.886077	0.679592	0.569786	0.687833	1.03704	1.36883	1.78161	2.00928	2.379	2.4839	2.35753	2.14607	1.66365	1.83357	1.05545	0.949103	0.906543	0.93687	1.24401	1.63587	2.00144	2.44758	2.68103	3.17088	3.42026	3.87044	4.15391	4.25788	4.37265	4.96249	5.42062	5.87389	6.24234	6.4665	7.18041	7.47695	7.75517	7.6055	7.98038	8.29979	8.91202	9.4344	9.80835	9.80002	9.34631
13	GRC	Greece	0.0217443	0.0254058	0.0302825	0.0340694	0.0359581	0.0377339	0.045464	0.0510203	0.0535182	0.0568005	0.0606531	0.062332	0.0637045	0.0311648	0.0226698	0.0161781	0.0141805	0.0206049	0.0276521	0.0396029	0.0564341	0.0651819	0.0827158	0.0870627	0.112498	0.13923	0.160886	0.205905	0.231983	0.2404	0.263446	0.286358	0.321638	0.360153	0.375822	0.445807	0.515802	0.610511	0.688197	0.695576	0.799618	0.932966	0.971295	1.08945	1.18199	1.2801	1.3862
14	HUN	Hungary	0.0755113	0.0782421	0.0684901	0.0638419	0.0483018	0.0442795	0.0509424	0.0611163	0.0523629	0.0810079	0.0854481	0.0877361	0.0894167	0.135445	0.153193	0.154478	0.0676391	0.0392262	0.0538518	0.0612513	0.05131	0.131169	0.167989	0.20071	0.230638	0.236096	0.22503	0.261422	0.239534	0.239894	0.293322	0.324236	0.355103	0.368909	0.397186	0.416552	0.499437	0.53627	0.584616	0.608059	0.643817	0.617712	0.65599	0.65375	0.695706	0.77331	0.792457
15	IRL	Ireland	0	0	0	0	0	0	0	0	0	0	0.0168117	0.0422291	0.0482971	0.0542082	0.0426631	0.0500769	0.0469173	0.0428051	0.0595223	0.0608499	0.0786296	0.0905577	0.0924532	0.0917042	0.0982955	0.102191	0.12304	0.138484	0.14963	0.1246	0.123348	0.125107	0.132334	0.16542	0.191886	0.182003	0.210218	0.228141	0.243033	0.276717	0.293331	0.287942	0.228303	0.321797	0.333661	0.352537	0.375147
16	ITA	Italy	0.606017	0.735413	0.761802	0.709135	0.728622	0.817918	0.934966	0.982357	0.940565	1.0366	1.09889	1.15393	0.809895	0.775633	0.670948	0.560565	0.475303	0.422907	0.57183	0.727767	0.816494	0.999728	1.20876	1.35429	1.5877	0.428759	0.295515	0.247268	0.222052	0.205986	2.52763	3.11972	3.57798	4.0777	4.60823	5.09343	5.37076	5.09207	5.42636	6.22291	6.97031	7.51705	7.96919	7.85231	8.16563	8.73689	8.84622
17	LUX	Luxembourg	0	0	0	0	0	0	0	0	0	0	0	0	0	0	0	0	0	0.00816059	0.0134331	0.0168598	0.0198858	0.0239037	0.0255861	0.0274995	0.0236389	0.0307221	0.0324865	0.0342791	0.0360138	0.0368277	0.0428312	0.0434693	0.0471005	0.0515388	0.0527364	0.0491151	0.0495997	0.0527922	0.0519673	0.0476605	0.0488231	0.0517667	0.0586384	0.0628199	0.0715728	0.0812646	0.0890512
18	NLD	Netherlands	0	0	0	0	0.0371046	0.0577418	0.0672451	0.0658818	0.0735686	0.0816657	0.086157	0.100639	0.104176	0.0950744	0.082814	0.0804117	0.0594061	0.0594607	0.0840222	0.104292	0.118491	0.11708	0.124772	0.143054	0.163384	0.175717	0.178854	0.217555	0.247796	0.265781	0.279507	0.319599	0.357644	0.383281	0.409844	0.428493	0.551595	0.589049	0.632384	0.675297	0.704588	0.698641	0.784546	0.812953	0.800657	0.793298	0.779227
19	NOR	Norway	0.0221351	0.0244711	0.0262284	0.0212436	0.0226876	0.022531	0.0247611	0.0265226	0.0291257	0.0320572	0.0338174	0.0386471	0.0299428	0.0349079	0.0398875	0.0373029	0.0383362	0.0275606	0.0455015	0.0502662	0.0556941	0.0620822	0.0638574	0.0733117	0.0764265	0.0820512	0.0853911	0.0896173	0.0994624	0.107652	0.113876	0.123672	0.128751	0.137092	0.153031	0.159683	0.170853	0.179745	0.198914	0.220771	0.243554	0.264714	0.281417	0.297127	0.300029	0.311208	0.312473
20	POL	Poland	0.208068	0.209492	0.183918	0.135234	0.0982624	0.103698	0.158129	0.18759	0.230438	0.2813	0.366449	0.383272	0.319947	0.143451	0.122239	0.114447	0.109939	0.107688	0.299003	0.345892	0.412839	0.494759	0.544054	0.614053	0.627604	0.751312	0.793616	0.882766	0.944815	1.04724	1.1741	1.25136	1.50045	1.68465	1.7683	1.82561	2.0473	2.23955	2.37376	2.61344	2.75864	2.8523	2.96003	3.12302	3.2794	3.54587	3.76573
21	PRT	Portugal	0.0179727	0.0221103	0.0253186	0.0252857	0.0315651	0.0421162	0.0484492	0.0564097	0.0649288	0.0686444	0.0727672	0.080374	0.0764759	0.0769627	0.0717302	0.0723459	0.0720536	0.0764843	0.0915715	0.116213	0.13572	0.144952	0.15896	0.177385	0.200102	0.214473	0.224496	0.223696	0.279069	0.272578	0.29113	0.29723	0.336631	0.35399	0.394552	0.408846	0.45583	0.477704	0.493412	0.524802	0.538631	0.58261	0.65675	0.698599	0.781898	0.90836	0.931599
22	ROU	Romania	0.0586614	0.0613012	0.0763661	0.0471533	0.0480992	0.0494672	0.0653845	0.0759298	0.081042	0.0960896	0.0977949	0.113184	0.0954248	0.130559	0.12705	0.174675	0.11063	0.0810936	0.0875249	0.104872	0.112118	0.131729	0.150109	0.234246	0.306931	0.387733	0.370809	0.42687	0.472128	0.525112	0.565151	0.624892	0.674279	0.731717	0.780526	0.940084	1.03576	1.17102	1.28388	1.39242	1.54079	1.66152	1.80154	1.88804	2.00739	2.12259	2.34424
23	SVK	Slovakia	0	0	0	0	0	0	0	0	0	0	0	0	0	0	0	0	0	0	0	0	0	0	0	0	0	0	0	0	0	0	0	0	0	0	0	0	0	0	0	0	0	0	0	0	0	0	0
24	SVN	Slovenia	0	0	0	0	0	0	0	0	0	0	0	0	0	0	0	0	0	0	0	0	0	0	0	0	0	0	0	0	0	0	0	0	0	0	0	0	0	0	0	0	0	0	0	0	0	0	0
25	ESP	Spain	0.276282	0.347003	0.365155	0.341924	0.313669	0.311294	0.305769	0.307277	0.184426	0.178386	0.164712	0.261131	0.33313	0.359967	0.371928	0.388144	0.416545	0.439338	0.485067	0.502814	0.534813	0.530848	0.581037	0.628496	0.677651	0.74104	0.847463	0.956205	0.994559	1.09624	1.19352	1.29553	1.32668	1.48246	1.4898	1.72214	1.89281	2.05568	2.52742	2.82995	3.21935	3.44855	3.68146	3.80511	4.2571	4.83454	5.17684
26	SWE	Sweden	0.064489	0.0842533	0.0946338	0.0875179	0.0855384	0.0766609	0.0997249	0.124321	0.137272	0.152287	0.17193	0.202527	0.149474	0.139098	0.161573	0.178288	0.199831	0.225681	0.265542	0.287018	0.287605	0.320294	0.360687	0.383699	0.404402	0.444907	0.470969	0.4933	0.497555	0.500693	0.516114	0.56385	0.574768	0.610255	0.629272	0.670445	0.726228	0.762143	0.76715	0.797165	0.820972	0.839797	0.866931	0.850276	0.84461	0.913213	0.816436
27	CHE	Switzerland	0.122428	0.144066	0.167934	0.185676	0.0385514	0.0219714	0.0161779	0.0133549	0.103417	0.139917	0.147545	0.151956	0.155129	0.168517	0.124292	0.10759	0.116015	0.114469	0.165337	0.226863	0.238845	0.236013	0.262001	0.31051	0.332985	0.3767	0.428624	0.494739	0.557391	0.57415	0.550866	0.644301	0.724634	0.844909	0.895364	0.887757	1.03145	1.00899	1.0708	1.06237	1.09944	1.15135	1.21546	1.30751	1.41265	1.4444	1.37361
28	GBR	United Kingdom	0.6293	0.740386	0.8247	0.980214	0.810382	0.831786	0.952434	1.06727	1.20862	1.32765	1.44392	1.61906	1.44878	1.49049	1.5299	1.49412	1.19504	1.08508	1.40882	1.50514	1.74705	1.89628	2.01843	2.12805	2.2977	2.36856	2.50781	2.63381	2.72078	2.66724	2.65422	2.80242	2.93786	3.10148	3.14838	3.16122	3.57992	3.69891	3.70588	3.8612	3.96462	3.96145	3.95479	4.09933	4.16113	4.45874	4.25094
29	USA	USA	4.59159	5.03578	5.16012	4.45876	3.39665	3.01278	3.32005	3.32769	4.2738	4.58569	4.41815	4.91727	5.28067	6.2513	6.98614	6.16461	5.06788	5.25807	6.82994	7.6839	8.46268	8.87117	9.48819	10.2881	10.6731	11.3099	11.7526	12.7018	13.564	13.595	14.0593	15.023	14.9855	15.1823	15.762	16.4471	17.2078	17.6218	18.2702	18.3405	19.0754	19.5015	19.5956	19.9954	20.4853	20.8697	21.1215
30	MEX	Mexico	0.0473213	0.0529961	0.00849251	0.00400768	0.054103	0.0601253	0.0623974	0.0639465	0.0720039	0.0855515	0.0937446	0.10329	0.120861	0.134917	0.149353	0.151105	0.169678	0.189704	0.194525	0.191296	0.218181	0.303123	0.376179	0.409105	0.424709	0.438364	0.46067	0.521287	0.586682	0.659708	0.672301	0.716412	0.804741	0.812034	0.887301	0.986293	1.14138	1.14878	1.28485	1.5863	1.61528	1.77503	1.89346	1.9545	2.21185	2.48189	2.68554
31	BRA	Brazil	0.0190719	0.0221905	0.0210449	0.0374813	0.036363	0.0516924	0.0744857	0.0862376	0.113239	0.135491	0.148924	0.168613	0.182146	0.190643	0.191967	0.192979	0.206439	0.202982	0.215455	0.23582	0.279668	0.321419	0.349909	0.37184	0.411085	0.502655	0.611353	0.685519	0.807728	0.850128	0.949252	0.981189	1.12128	1.19431	1.29059	1.33489	1.44127	1.45591	1.56349	1.65958	1.86091	2.00788	2.10989	2.28662	2.60545	3.02837	3.38415
32	EGY	Egypt	0.0123213	0.0251806	0.0424766	0.0381485	0.0396549	0.0464101	0.0491634	0.0610455	0.0580264	0.0581996	0.0646473	0.0658478	0.065631	0.07392	0.0763184	0.0654541	0.0774359	0.0806612	0.102147	0.113861	0.132579	0.141289	0.170243	0.192991	0.176462	0.1971	0.231648	0.243891	0.24727	0.266664	0.278714	0.317597	0.335918	0.379171	0.392623	0.445401	0.45999	0.456576	0.488398	0.511564	0.573254	0.646804	0.674651	0.71742	0.702301	0.698029	0.660064
33	TUR	Türkiye	0.0140008	0.0164263	0.0151492	0.024803	0.0280792	0.0311322	0.042972	0.0367008	0.0467928	0.0564061	0.0695191	0.075414	0.0734004	0.075338	0.0629403	0.0489933	0.076343	0.0804183	0.0897894	0.0976868	0.0983126	0.105407	0.110069	0.113435	0.128506	0.146556	0.189067	0.220603	0.259735	0.331832	0.400533	0.461601	0.540959	0.554384	0.627725	0.724313	0.796432	0.898181	1.03632	1.14749	1.27914	1.54102	1.71384	2.00224	2.23218	2.38533	2.69306
34	IRN	Iran	0	0	0	0	0	0	0	0	0.0102176	0.0115908	0.0121842	0.0337846	0.0158345	0.0145402	0.0143932	0.0107389	0.0108371	0.00842024	0.0114097	0.0117495	0.0159956	0.0155175	0.0167329	0.0172388	0.0184257	0.0178849	0.0174416	0.0208256	0.0354453	0.0346437	0.0855222	0.124306	0.172455	0.172817	0.177744	0.181388	0.184765	0.194962	0.310669	0.329124	0.439755	0.534688	0.600113	0.670028	0.696021	0.818445	0.919505
35	SAU	Saudi Arabia	0	0	0	0	0	0	0	0	0	0	0	0	0	0	0	0	0	0	0	0	0	0	0	0	0	0	0	0	0	0	0.497415	0.0684107	0.0306479	0.0390242	0.0455217	0.0531516	0.0653395	0.0660464	0.0662697	0.0857103	0.11737	0.131461	0.156818	0.167444	0.211618	0.226385	0.242234
36	IND	India	0.111809	0.122008	0.154718	0.137167	0.139907	0.147791	0.176748	0.205904	0.228389	0.26461	0.317588	0.374648	0.433453	0.493321	0.525844	0.525994	0.519473	0.54497	0.517424	0.428736	0.439607	0.542914	0.652687	0.783141	0.873377	0.944884	1.0746	1.12754	1.23258	1.38876	1.52003	1.68983	1.90073	2.0254	2.13656	2.31715	2.43251	2.64067	2.78584	2.95924	3.06731	3.36039	3.49225	3.79164	4.01253	3.9504	3.86049
37	CHN	China	0.0455973	0.0698012	0.0878426	0.0967694	0.052487	0.0614998	0.055397	0.0508828	0.0920415	0.156419	0.17079	0.263021	0.298145	0.265891	0.333048	0.340721	0.286817	0.159983	0.109029	0.166328	0.198239	0.280571	0.163113	0.297918	0.441812	0.776387	0.953548	0.984849	1.33458	1.47072	1.93992	2.53253	2.86352	2.38399	2.21472	2.38151	2.51059	2.65917	2.71815	2.26976	2.43288	2.63718	2.6935	3.04505	3.40865	5.16823	5.40837
38	KOR	South Korea	0	0	0	0	0	0	0	0	0	0	0	0	0	0.139925	0.148399	0.181912	0.149687	0.0444522	0.0321769	0.0274709	0.0242387	0.0228325	0.0198749	0.0182192	0.0203196	0.0208761	0.0301991	0.0403381	0.0560478	0.081764	0.128045	0.164	0.203599	0.243451	0.293925	0.301	0.337609	0.351353	0.350902	0.386657	0.501646	0.659539	0.799881	0.956612	0.973849	1.17781	1.30789
39	JPN	Japan	0.4516	0.545866	0.520583	0.525255	0.557029	0.689574	0.758161	0.870943	0.94573	1.02849	0.930787	0.89075	0.808074	0.97518	0.850433	0.784754	0.69348	0.486091	0.427762	0.439947	0.498009	0.656649	0.808974	1.06823	1.30391	1.7592	2.31805	2.65351	3.09433	3.44844	3.5795	4.01663	4.83608	5.37051	6.06325	6.36838	6.7609	6.8002	7.43957	8.09215	8.75364	9.21006	9.84588	10.1636	10.3851	12.5048	12.6208
40	VNM	Vietnam	0	0	0	0	0	0	0	0	0	0	0	0	0	0	0	0	0	0	0	0	0	0	0	0	0	0.0553034	0.0558511	0.0670703	0.0796167	0.0831468	0.0763282	0.0916665	0.0995212	0.110989	0.117563	0.124016	0.170746	0.220593	0.219521	0.231815	0.182862	0.198556	0.209471	0.208034	0.157797	0.203447	0.196651
41	IDN	Indonesia	0	0	0	0	0	0	0	0	0	0	0	0	0	0.0557984	0.00755527	0.00333755	0.00215425	0.00165038	0.0013658	0.0030599	0.00838781	0.00204099	0.00140373	0.0211992	0.0307129	0.0353152	0.03671	0.0379934	0.0308547	0.0393117	0.0689083	0.0818676	0.0935547	0.10795	0.124762	0.0954884	0.114555	0.104404	0.100092	0.0937027	0.115693	0.144818	0.154904	0.160032	0.166894	0.205039	0.234146
42	ZAF	South Africa	0	0	0	0	0	0	0	0	0	0	0	0	0	0	0	0	0	0	0	0	0	0	0	0	0	0.2738	0.317843	0.361208	0.39656	0.420592	0.459918	0.465397	0.482962	0.47969	0.495973	0.533191	0.619018	0.693963	0.728931	0.724758	0.813954	0.910502	1.03593	1.08147	1.13503	1.25283	1.34031
		ROW	0.432643	0.607531	0.77745	0.857447	0.936086	0.84869	1.01336	1.23534	1.53037	1.70254	1.66097	1.68686	1.76346	1.84182	1.86024	1.90284	1.93118	1.41091	1.70588	2.01196	2.37965	2.77182	3.4576	4.14418	4.93138	5.46811	6.39374	7.40977	8.17033	9.25656	10.5876	12.0808	13.653	15.2482	16.7666	18.2971	19.8046	21.8852	24.0668	25.6555	27.2908	28.6137	30.6803	32.453	34.7909	36.3965	37.9821
[truncated: 50 more columns]
